# Supplementary material
Source: publisher figshare collection journal article supplement (https://acs.figshare.com/ndownloader/files/5397116)
Supplement: Supplementary file 1 [file 5397116]

## SUPPORTING INFORMATION

### **Intramolecular Imidoylative Heck Reaction: Synthesis of Cyclic Ketoimines from Functionalized Isocyanide**

Jian Wang, Shi Tang and Qiang Zhu\*

#### **Contents**

|                                                                  |    |
|------------------------------------------------------------------|----|
| I. General Information .....                                     | 2  |
| II. Preparation of Starting Materials .....                      | 2  |
| III. Imidoylative Heck Reaction .....                            | 10 |
| IV. Characterization Data .....                                  | 12 |
| V. References .....                                              | 28 |
| VI. Copies of $^1\text{H}$ and $^{13}\text{C}$ NMR Spectra ..... | 29 |

## I. General Information

$^1\text{H}$  NMR (400 MHz) and  $^{13}\text{C}$  NMR (125 MHz) were registered on 400 M and 500 M spectrometers, respectively. Chemical shifts were reported in units (ppm) by assigning TMS resonance in the  $^1\text{H}$  spectrum as 0.00 ppm,  $\text{CDCl}_3$  resonance in the  $^{13}\text{C}$  spectrum as 77.0 ppm. All coupling constants ( $J$  values) were reported in Hertz (Hz). NMR analysis was carried out at 298 K unless noted otherwise. HRMS was obtained on an ESI-LC-MS/MS spectrometer.

## II. Preparation of Starting Materials

### ethyl 2-isobutyl-2-isocyanohept-6-enoate (**1a**):<sup>1,2</sup>

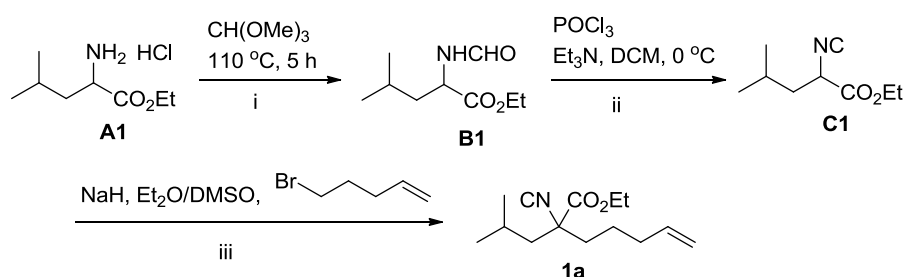

(i) A 250 mL round bottom flask charged with 100 mL of  $\text{CH}(\text{OMe})_3$  (solvent) and **A1** (10 mmol, 1.95 g) was heated at  $110\text{ }^\circ\text{C}$  for 5 h. The solvent was removed under reduced pressure to afford the crude product **B1** for the next step without further purification.

(ii) To a solution of crude **B1** (10 mmol, 1.0 equiv) and  $\text{Et}_3\text{N}$  (4 equiv) in 100 mL of dry  $\text{DCM}$  was added  $\text{POCl}_3$  (1.2 equiv) dropwise in 30 min at  $-20\text{ }^\circ\text{C}$ . The reaction mixture was stirred for 4 h. Then 10 mL of  $\text{H}_2\text{O}$  was added dropwise to the reaction mixture carefully at  $-20\text{ }^\circ\text{C}$ . The crude reaction mixture was extracted with  $\text{DCM}$  ( $100\text{ mL} \times 3$ ) and washed with brine (100 mL). The organic phase was concentrated in *vacuo* and the residue was purified by silica gel flash column chromatography (petroleum ether :  $\text{EtOAc}$  = 8 : 1) to afford the product **C1** as colorless liquid in 85% yield.

(iii) An oven-dried 100 mL round bottom flask charged with a stir-bar and  $\text{NaH}$  (60%) (10 mmol, 2 equiv) was vacuumed and refilled with Ar for 3 times. A mixture solution of  $\text{DMSO}$  (2 mL) and  $\text{Et}_2\text{O}$  (50 mL) was added to the flask using a syringe. Then 5 mmol of **C1** (1.0 equiv) was added to the mixture dropwise in 10 min at room temperature and the reaction mixture was stirred for 30 min. Two equivalents of

5-bromopent-1-ene was added with a syringe and the reaction mixture was stirred for 30 min. Then 2 mL of H<sub>2</sub>O was added dropwise to the reaction mixture carefully at room temperature. The crude reaction mixture was extracted with DCM (20 mL × 3) and washed with brine (20 mL). The organic phase was concentrated in *vacuo* and the residue was purified by silica gel flash column chromatography (petroleum ether : EtOAc = 16 : 1) to afford the product **1a** as colorless liquid in 91% yield. (new compound)

<sup>1</sup>H NMR (400 MHz, CDCl<sub>3</sub>): δ 5.78-5.68 (m, 1H), 5.02-4.95 (m, 2H), 4.25-4.20 (m, 2H), 2.07-2.01 (m, 2H), 1.92-1.81 (m, 3H), 1.75-1.65 (m, 3H), 1.30 (t, *J* = 7.2 Hz, 3H), 0.98 (d, *J* = 6.8 Hz, 3H), 0.84 (d, *J* = 6.8 Hz, 3H); <sup>13</sup>C NMR (125 MHz, CDCl<sub>3</sub>): δ 169.3, 159.6, 137.4, 115.4, 67.6, 62.4, 47.1, 40.1, 32.9, 25.0, 23.7, 23.1, 22.3, 14.0; HRMS: calcd for C<sub>14</sub>H<sub>24</sub>NO<sub>2</sub> (M<sup>+</sup>+H) 238.1802; found 238.1804.

#### methyl 2-isocyano-2-isopropylhept-6-enoate (**1b**):

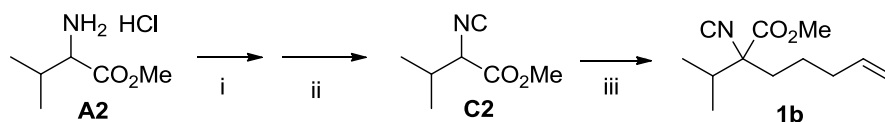

(i) A 250 mL round bottom flask charged with 50 mL of CH(OMe)<sub>3</sub> (solvent) and **A2** (5 mmol, 835 mg) was heated at 110 °C for 5 h. The solvent was removed under reduced pressure to afford the crude product **B2** for the next step without further purification.

(ii) To a solution of crude **B2** (5 mmol, 1.0 equiv) and Et<sub>3</sub>N (4 equiv) in 50 mL of dry DCM was added POCl<sub>3</sub> (1.2 equiv) dropwise in 30 min at -20 °C. The reaction mixture was stirred for 4 h. Then 10 mL of H<sub>2</sub>O was added dropwise to the reaction mixture carefully at -20 °C. The crude reaction mixture was extracted with DCM (100 mL × 3) and washed with brine (100 mL). The organic phase was concentrated in *vacuo* and the residue was purified by silica gel flash column chromatography (petroleum ether : EtOAc = 8 : 1) to afford the product **C2** as colorless liquid in 78% yield.

(iii) An oven-dried 100 mL round bottom flask charged with a stir-bar and NaH (60%) (4 mmol, 2 equiv) was vacuumed and refilled with Ar for 3 times. A mixture solution of DMSO (1 mL) and Et<sub>2</sub>O (20 mL) was added to the flask using a syringe. Then 2 mmol of **C2** (1.0 equiv) was added to the mixture dropwise in 10 min at room temperature and the reaction mixture was stirred for 30 min. Two equivalents of

5-bromopent-1-ene was added with a syringe and the reaction mixture was stirred for 30 min. Then 2 mL of H<sub>2</sub>O was added dropwise to the reaction mixture carefully at room temperature. The crude reaction mixture was extracted with DCM (20 mL  $\times$  3) and washed with brine (20 mL). The organic phase was concentrated in *vacuo* and the residue was purified by silica gel flash column chromatography (petroleum ether : EtOAc = 16 : 1) to afford the product **1b** as colorless liquid in 87% yield. (new compound)

<sup>1</sup>H NMR (400 MHz, CDCl<sub>3</sub>):  $\delta$  5.74-5.66 (m, 1H), 5.00-4.92 (m, 2H), 3.76 (s, 3H), 2.13-2.01 (m, 3H), 1.81-1.77 (m, 2H), 1.66-1.59 (m, 1H), 1.23-1.16 (m, 1H), 1.01 (d,  $J$  = 6.8 Hz, 3H), 0.90 (d,  $J$  = 6.8 Hz, 3H); <sup>13</sup>C NMR (125 MHz, CDCl<sub>3</sub>):  $\delta$  169.5, 159.5, 137.4, 115.4, 53.0, 36.6, 35.6, 33.0, 23.6, 17.8, 16.3; HRMS: calcd for C<sub>12</sub>H<sub>20</sub>NO<sub>2</sub> (M<sup>+</sup>+H) 210.1489; found 210.1490.

**methyl 2-(sec-butyl)-2-isocyanohept-6-enoate (1c):**

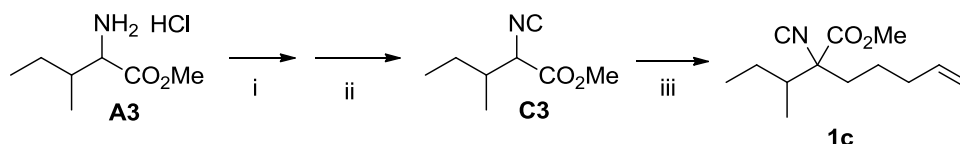

(i) A 250 mL round bottom flask charged with 50 mL of CH(OMe)<sub>3</sub> (solvent) and **A3** (5 mmol, 905 mg) was heated at 110 °C for 5 h. The solvent was removed under reduced pressure to afford the crude product **B3** for the next step without further purification.

(ii) To a solution of crude **B3** (5 mmol, 1.0 equiv) and Et<sub>3</sub>N (4 equiv) in 50 mL of dry DCM was added POCl<sub>3</sub> (1.2 equiv) dropwise in 30 min at -20 °C. The reaction mixture was stirred for 4 h. Then 10 mL of H<sub>2</sub>O was added dropwise to the reaction mixture carefully at -20 °C. The crude reaction mixture was extracted with DCM (100 mL  $\times$  3) and washed with brine (100 mL). The organic phase was concentrated in *vacuo* and the residue was purified by silica gel flash column chromatography (petroleum ether : EtOAc = 8 : 1) to afford the product **C3** as colorless liquid in 89% yield.

(iii) An oven-dried 100 mL round bottom flask charged with a stir-bar and NaH (60%) (4 mmol, 2 equiv) was vacuumed and refilled with Ar for 3 times. A mixture solution of DMSO (1 mL) and Et<sub>2</sub>O (20 mL) was added to the flask using a syringe. Then 2 mmol of **C3** (1.0 equiv) was added to the mixture dropwise in 10 min at room temperature and the reaction mixture was stirred for 30 min. Two equivalents of

5-bromopent-1-ene was added with a syringe and the reaction mixture was stirred for 30 min. Then 2 mL of H<sub>2</sub>O was added dropwise to the reaction mixture carefully at room temperature. The crude reaction mixture was extracted with DCM (20 mL × 3) and washed with brine (20 mL). The organic phase was concentrated in *vacuo* and the residue was purified by silica gel flash column chromatography (petroleum ether : EtOAc = 16 : 1) to afford the product **1c** as colorless liquid in 76% yield. (new compound)

<sup>1</sup>H NMR (400 MHz, CDCl<sub>3</sub>): δ 5.77-5.70 (m, 1H), 5.03-4.95 (m, 2H), 3.78 (s, 3H), 2.08-2.03 (m, 2H), 1.89-1.70 (m, 3H), 1.69-1.62 (m, 1H), 1.32-1.17 (m, 1H), 1.01 (d, *J* = 6.8 Hz, 2H), 0.96-0.88 (m, 4H); <sup>13</sup>C NMR (125 MHz, CDCl<sub>3</sub>): δ 169.8, 159.4, 137.5, 115.4, 73.3, 53.0, 42.1, 36.8, 33.1, 25.0, 23.5, 12.5, 11.8; HRMS: calcd for C<sub>13</sub>H<sub>22</sub>NO<sub>2</sub> (M<sup>+</sup>+H) 224.1645; found 224.1649.

#### methyl 2-(tert-butyl)-2-isocyanohept-6-enoate (**1d**):

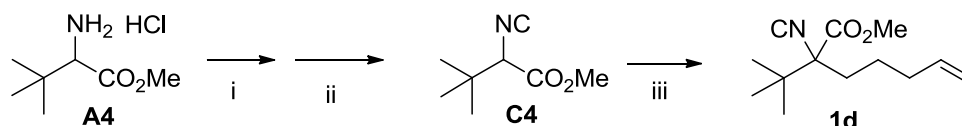

(i) A 250 mL round bottom flask charged with 50 mL of CH(OMe)<sub>3</sub> (solvent) and **A4** (5 mmol, 905 mg) was heated at 110 °C for 5 h. The solvent was removed under reduced pressure to afford the crude product **B4** for the next step without further purification.

(ii) To a solution of crude **B4** (5 mmol, 1.0 equiv) and Et<sub>3</sub>N (4 equiv) in 50 mL of dry DCM was added POCl<sub>3</sub> (1.2 equiv) dropwise in 30 min at -20 °C. The reaction mixture was stirred for 4 h. Then 10 mL of H<sub>2</sub>O was added dropwise to the reaction mixture carefully at -20 °C. The crude reaction mixture was extracted with DCM (100 mL × 3) and washed with brine (100 mL). The organic phase was concentrated in *vacuo* and the residue was purified by silica gel flash column chromatography (petroleum ether : EtOAc = 8 : 1) to afford the product **C4** as colorless liquid in 65% yield.

(iii) An oven-dried 100 mL round bottom flask charged with a stir-bar and NaH (60%) (4 mmol, 2 equiv) was vacuumed and refilled with Ar for 3 times. A mixture solution of DMSO (1 mL) and Et<sub>2</sub>O (20 mL) was added to the flask using a syringe. Then 2 mmol of **C4** (1.0 equiv) was added to the mixture dropwise in 10 min at room temperature and the reaction mixture was stirred for 30 min. Two equivalents of

5-bromopent-1-ene was added with a syringe and the reaction mixture was stirred for 30 min. Then 2 mL of H<sub>2</sub>O was added dropwise to the reaction mixture carefully at room temperature. The crude reaction mixture was extracted with DCM (20 mL × 3) and washed with brine (20 mL). The organic phase was concentrated in *vacuo* and the residue was purified by silica gel flash column chromatography (petroleum ether : EtOAc = 16 : 1) to afford the product **1d** as colorless liquid in 51% yield. (new compound)

<sup>1</sup>H NMR (400 MHz, CDCl<sub>3</sub>): δ 5.82-5.72 (m, 1H), 5.05-4.97 (m, 2H), 3.79 (s, 3H), 2.11-1.99 (m, 3H), 1.75-1.64 (m, 2H), 1.28-1.16 (m, 1H), 1.07 (s, 9H); <sup>13</sup>C NMR (125 MHz, CDCl<sub>3</sub>): δ 169.1, 159.8, 138.0, 115.6, 76.1, 53.1, 38.3, 33.5, 32.9, 25.9, 24.6; HRMS: calcd for C<sub>13</sub>H<sub>22</sub>NO<sub>2</sub> (M<sup>+</sup>+H) 224.1645; found 224.1642.

**ethyl 2-isobutyl-2-isocyanohept-5-enoate (1e):**

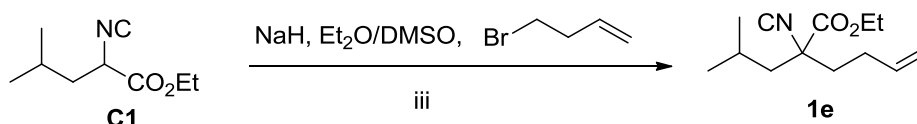

(iii) An oven-dried 100 mL round bottom flask charged with a stir-bar and NaH (60%) (4 mmol, 2 equiv) was vacuumed and refilled with Ar for 3 times. A mixture solution of DMSO (1 mL) and Et<sub>2</sub>O (20 mL) was added to the flask using a syringe. Then 2 mmol of **C1** (1.0 equiv) was added to the mixture dropwise in 10 min at room temperature and the reaction mixture was stirred for 30 min. Two equivalents of 4-bromobut-1-ene was added with a syringe and the reaction mixture was stirred for 30 min. Then 2 mL of H<sub>2</sub>O was added dropwise to the reaction mixture carefully at room temperature. The crude reaction mixture was extracted with DCM (20 mL × 3) and washed with brine (20 mL). The organic phase was concentrated in *vacuo* and the residue was purified by silica gel flash column chromatography (petroleum ether : EtOAc = 16 : 1) to afford the product **1e** as colorless liquid in 91% yield. (new compound)

<sup>1</sup>H NMR (400 MHz, CDCl<sub>3</sub>): δ 5.77-5.70 (m, 1H), 5.07-4.97 (m, 2H), 4.26-4.20 (m, 2H), 2.32-2.30 (m, 1H), 2.02-1.90 (m, 2H), 1.88-1.81 (m, 3H), 1.75-1.67 (m, 1H), 1.31 (t, *J* = 7.2 Hz, 3H), 1.00 (d, *J* = 6.4 Hz, 3H), 0.86 (d, *J* = 6.4 Hz, 3H); <sup>13</sup>C NMR (125 MHz, CDCl<sub>3</sub>): δ 169.1, 159.8, 136.1, 116.0, 67.3, 62.5, 47.3, 39.9, 28.2, 25.0, 23.7, 22.3, 14.0; HRMS: calcd for C<sub>13</sub>H<sub>22</sub>NO<sub>2</sub> (M<sup>+</sup>+H) 224.1645; found 224.1647.

**(E)-ethyl 2-isobutyl-2-isocyano-5-phenylpent-4-enoate (1f):**

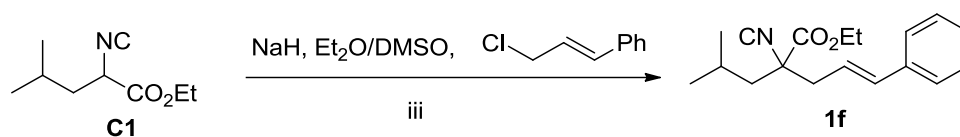

(iii) An oven-dried 100 mL round bottom flask charged with a stir-bar and NaH (60%) (4 mmol, 2 equiv) was vacuumed and refilled with Ar for 3 times. A mixture solution of DMSO (1 mL) and Et<sub>2</sub>O (20 mL) was added to the flask using a syringe. Then 2 mmol of **C1** (1.0 equiv) was added to the mixture dropwise in 10 min at room temperature and the reaction mixture was stirred for 30 min. Two equivalents of (E)-(3-chloroprop-1-en-1-yl)benzene was added with a syringe and the reaction mixture was stirred for 30 min. Then 2 mL of H<sub>2</sub>O was added dropwise to the reaction mixture carefully at room temperature. The crude reaction mixture was extracted with DCM (20 mL × 3) and washed with brine (20 mL). The organic phase was concentrated in *vacuo* and the residue was purified by silica gel flash column chromatography (petroleum ether : EtOAc = 16 : 1) to afford the product **1f** as yellow oil in 57% yield. (new compound)

<sup>1</sup>H NMR (400 MHz, CDCl<sub>3</sub>): δ 7.37-7.23 (m, 5H), 6.51 (d, *J* = 16.0 Hz, 1H), 6.21-6.13 (m, 1H), 4.23 (q, *J* = 6.8 Hz, 2H), 2.80-2.64 (m, 2H), 1.97-1.89 (m, 2H), 1.83-1.79 (m, 1H), 1.28 (t, *J* = 6.8 Hz, 3H), 1.02 (d, *J* = 6.0 Hz, 3H), 0.89 (d, *J* = 6.0 Hz, 3H); <sup>13</sup>C NMR (125 MHz, CDCl<sub>3</sub>): δ 169.2, 160.4, 136.9, 136.0, 128.9, 128.2, 126.8, 121.5, 67.9, 62.9, 46.8, 44.6, 25.4, 24.0, 22.6, 14.4; HRMS: calcd for C<sub>18</sub>H<sub>24</sub>NO<sub>2</sub> (M<sup>+</sup>+H) 286.1802; found 286.1798.

**ethyl 2-isocyano-2-(pent-4-en-1-yl)hept-6-enoate (1g):**

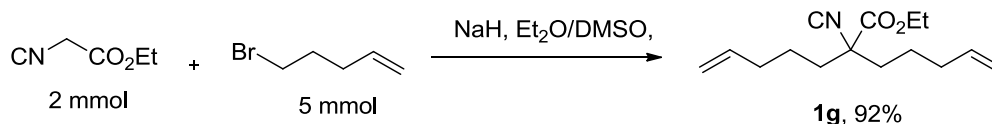

(iii) An oven-dried 100 mL round bottom flask charged with a stir-bar and NaH (60%) (6 mmol, 3 equiv) was vacuumed and refilled with Ar for 3 times. A mixture solution of DMSO (1 mL) and Et<sub>2</sub>O (20 mL) was added to the flask using a syringe. Then 2 mmol of ethyl 2-isocyanoacetate (1.0 equiv) was added to the mixture dropwise in 10 min at room temperature and the reaction mixture was stirred for 30 min. Three equivalents of 5-bromopent-1-ene was added with a syringe and the reaction mixture was stirred for 30 min. Then 2 mL of H<sub>2</sub>O was added dropwise to the

reaction mixture carefully at room temperature. The crude reaction mixture was extracted with DCM (20 mL  $\times$  3) and washed with brine (20 mL). The organic phase was concentrated in *vacuo* and the residue was purified by silica gel flash column chromatography (petroleum ether : EtOAc = 16 : 1) to afford the product **1g** as colorless liquid in 92% yield. (new compound)

$^1\text{H}$  NMR (400 MHz,  $\text{CDCl}_3$ ):  $\delta$  5.77-5.67 (m, 2H), 5.01-4.94 (m, 4H), 4.23 (q,  $J$  = 7.2 Hz, 2H), 2.07-2.02 (m, 4H), 1.92-1.85 (m, 2H), 1.78-1.59 (m, 4H), 1.37-1.27 (m, 5H);  $^{13}\text{C}$  NMR (125 MHz,  $\text{CDCl}_3$ ):  $\delta$  168.8, 159.1, 137.4, 115.4, 68.3, 62.5, 38.5, 33.0, 23.2, 14.1; HRMS: calcd for  $\text{C}_{15}\text{H}_{24}\text{NO}_2$  ( $\text{M}^+ + \text{H}$ ) 250.1802; found 250.1802.

#### diethyl (6-isocyanoundeca-1,10-dien-6-yl)phosphonate (**1h**)

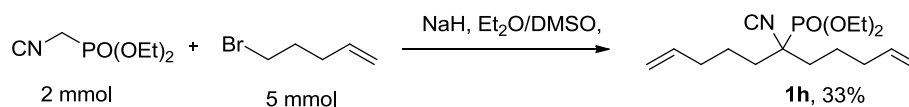

(iii) An oven-dried 100 mL round bottom flask charged with a stir-bar and NaH (60%) (6 mmol, 3 equiv) was vacuumed and refilled with Ar for 3 times. A mixture solution of DMSO (1 mL) and  $\text{Et}_2\text{O}$  (20 mL) was added to the flask using a syringe. Then 2 mmol of diethyl (isocyanomethyl)phosphonate (1.0 equiv) was added to the mixture dropwise in 10 min at room temperature and the reaction mixture was stirred for 30 min. Three equivalents of 5-bromopent-1-ene was added with a syringe and the reaction mixture was stirred for 30 min. Then 2 mL of  $\text{H}_2\text{O}$  was added dropwise to the reaction mixture carefully at room temperature. The crude reaction mixture was extracted with DCM (20 mL  $\times$  3) and washed with brine (20 mL). The organic phase was concentrated in *vacuo* and the residue was purified by silica gel flash column chromatography (petroleum ether : EtOAc = 8 : 1) to afford the product **1h** as colorless liquid in 33% yield. (new compound)

$^1\text{H}$  NMR (400 MHz,  $\text{CDCl}_3$ ):  $\delta$  5.82-5.72 (m, 2H), 5.05-4.97 (m, 4H), 4.27-4.19 (m, 4H), 2.10-2.05 (m, 4H), 1.93-1.75 (m, 4H), 1.65-1.54 (m, 4H), 1.36 (t,  $J$  = 6.8 Hz, 6H);  $^{13}\text{C}$  NMR (125 MHz,  $\text{CDCl}_3$ ):  $\delta$  159.6, 138.0, 115.8, 64.4 (d,  $J$  = 7.4 Hz), 62.0 (d,  $J$  = 155.4 Hz), 34.6, 33.7, 23.1 (d,  $J$  = 5.4 Hz), 16.8 (d,  $J$  = 5.6 Hz); HRMS: calcd for  $\text{C}_{16}\text{H}_{29}\text{NO}_3\text{P}$  ( $\text{M}^+ + \text{H}$ ) 314.1880; found 314.1885.

#### ethyl 2-isobutyl-2-isocyanopent-4-enoate (**1i**):



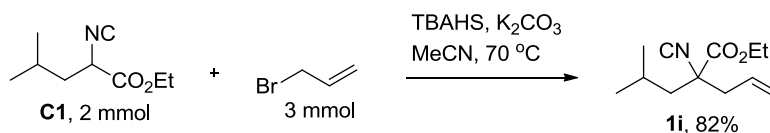

Compound **1i** was prepared according to similar route of literature reported methods<sup>3</sup>: To a solution of **C1** (2 mmol) in acetonitrile (20 mL) were added  $\text{K}_2\text{CO}_3$  (8 mmol), TBAHS (0.2 mmol), and 3-bromoprop-1-ene (3 mmol). The mixture was heated at 70 °C until the reaction was completed, monitoring with TLC. Then the mixture was cooled and the solvent was removed and reduced pressure.  $\text{H}_2\text{O}$  (10 mL) and ethyl acetate (20 mL) were added into the mixture. The organic phase was separated and the aqueous phase was extracted with ethyl acetate (20.0 mL  $\times$  3). The combined organic phase was concentrated in *vacuo* and the residue was purified by silica gel flash column chromatography (petroleum ether : EtOAc = 8 : 1) to afford **1i** as colorless liquid in 82% yield. (new compound)

$^1\text{H}$  NMR (400 MHz,  $\text{CDCl}_3$ ):  $\delta$  5.84-5.74 (m, 1H), 5.24-5.17 (m, 2H), 4.27-4.20 (m, 2H), 2.65-2.47 (m, 2H), 1.94-1.72 (m, 3H), 1.31 (t,  $J$  = 7.2 Hz, 3H), 1.01 (d,  $J$  = 6.4 Hz, 3H), 0.87 (d,  $J$  = 6.4 Hz, 3H);  $^{13}\text{C}$  NMR (125 MHz,  $\text{CDCl}_3$ ):  $\delta$  168.9, 159.8, 130.0, 120.9, 67.3, 62.5, 46.5, 44.9, 25.0, 23.6, 22.3, 14.1; HRMS: calcd for  $\text{C}_{12}\text{H}_{20}\text{NO}_2$  ( $\text{M}^+ + \text{H}$ ) 210.1489; found 210.1485.

#### ethyl 2-isocyanopent-4-enoate (**1j**):

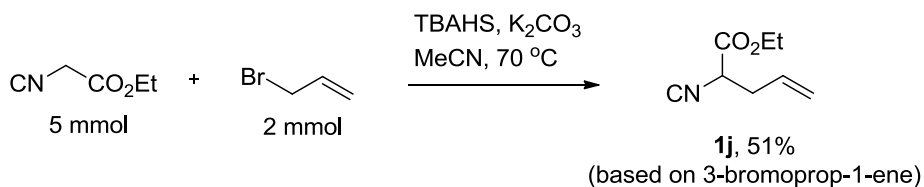

To a solution of ethyl 2-isocynoacetate (5 mmol, 2.5 equiv) in acetonitrile (20 mL) were added  $\text{K}_2\text{CO}_3$  (10 mmol), TBAHS (0.2 mmol), and 3-bromoprop-1-ene (2 mmol). The mixture was heated at 70 °C until the reaction was completed, monitoring with TLC. Then the mixture was cooled and the solvent was removed and reduced pressure.  $\text{H}_2\text{O}$  (10 mL) and ethyl acetate (20 mL) were added into the mixture. The organic phase was separated and the aqueous phase was extracted with ethyl acetate (20.0 mL  $\times$  3). The combined organic phase was concentrated in *vacuo* and the residue was purified by silica gel flash column chromatography (petroleum ether : EtOAc = 8 : 1) to afford **1i** as colorless liquid in 51% yield. (known compound)<sup>4</sup>

$^1\text{H}$  NMR (400 MHz,  $\text{CDCl}_3$ ):  $\delta$  5.81-5.71 (m, 1H), 5.24-5.19 (m, 2H), 4.30-4.20 (m, 3H), 2.69-2.55 (m, 2H), 1.27 (t,  $J$  = 7.2 Hz, 3H);  $^{13}\text{C}$  NMR (125 MHz,  $\text{CDCl}_3$ ):  $\delta$

166.1, 160.4, 130.4, 120.4, 62.7, 56.3, 37.0, 14.0; HRMS: calcd for C<sub>8</sub>H<sub>12</sub>NO<sub>2</sub> (M<sup>+</sup>+H) 154.0863; found 154.0861.

### III. Imidoylative Heck Reaction

**Table 1. Detailed Information of Conditions Optimization <sup>a</sup>**

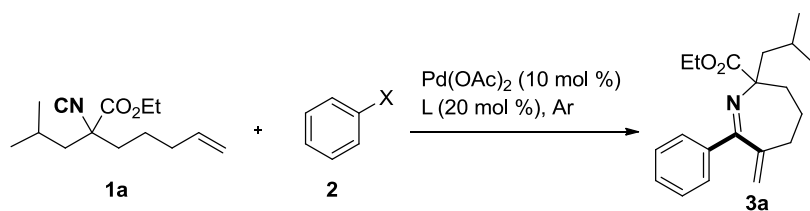

| entry               | solvent            | base (1.2 equiv)                | ligand (20 mol %) | temp (°C) | yield (%) <sup>b</sup> |
|---------------------|--------------------|---------------------------------|-------------------|-----------|------------------------|
| 1                   | toluene            | Na <sub>2</sub> CO <sub>3</sub> | PPh <sub>3</sub>  | 80        | nd                     |
| 2 <sup>c</sup>      | toluene            | Na <sub>2</sub> CO <sub>3</sub> | PPh <sub>3</sub>  | 80        | 18                     |
| 3 <sup>c</sup>      | toluene            | K <sub>2</sub> CO <sub>3</sub>  | PPh <sub>3</sub>  | 80        | 18                     |
| 4 <sup>c</sup>      | toluene            | Cs <sub>2</sub> CO <sub>3</sub> | PPh <sub>3</sub>  | 80        | 30                     |
| 5 <sup>c</sup>      | toluene            | CsOPiv                          | PPh <sub>3</sub>  | 80        | 70                     |
| 6 <sup>c</sup>      | toluene            | Et <sub>3</sub> N               | PPh <sub>3</sub>  | 80        | 25                     |
| 7 <sup>c</sup>      | DMSO               | CsOPiv                          | PPh <sub>3</sub>  | 80        | 70                     |
| 8 <sup>c</sup>      | dioxane            | CsOPiv                          | PPh <sub>3</sub>  | 80        | 33                     |
| 9 <sup>c</sup>      | CH <sub>3</sub> CN | CsOPiv                          | PPh <sub>3</sub>  | 80        | 40                     |
| 10 <sup>c,e</sup>   | toluene            | CsOPiv                          | PPh <sub>3</sub>  | 80        | 81 (79) <sup>f</sup>   |
| 11 <sup>c,e</sup>   | toluene            | CsOPiv                          | dppb (10 mol %)   | 80        | 75                     |
| 12 <sup>c,e</sup>   | toluene            | CsOPiv                          | BINAP (10 mol %)  | 80        | trace                  |
| 13 <sup>c,e,g</sup> | toluene            | CsOPiv                          | PPh <sub>3</sub>  | 80        | 78                     |
| 14 <sup>c,e,h</sup> | toluene            | CsOPiv (1.0 equiv)              | PPh <sub>3</sub>  | 80        | 70                     |
| 15 <sup>c,e,i</sup> | toluene            | CsOPiv                          | PPh <sub>3</sub>  | 80        | 85 (change)            |
| 16 <sup>c,j</sup>   | toluene            | CsOPiv                          | PPh <sub>3</sub>  | 80        | 56 <sup>f</sup>        |
| 17 <sup>c,e</sup>   | toluene            | CsOPiv                          | PPh <sub>3</sub>  | 70        | 45 <sup>f</sup>        |
| 18 <sup>c,e,k</sup> | toluene            | CsOPiv                          | PPh <sub>3</sub>  | 70        | 0                      |
| 19 <sup>d,e</sup>   | toluene            | CsOPiv                          | PPh <sub>3</sub>  | 100       | 85 (82) <sup>f</sup>   |

<sup>a</sup> Reaction conditions: **1a** (0.2 mmol), **2** (0.30 mmol), Pd(OAc)<sub>2</sub> (0.02 mmol, 10 mol %), PPh<sub>3</sub> (0.04 mmol, 20 mol %), base (0.24 mmol), Ar. A solution of **1a** in solvent (1 mL) was added slowly within 1 h. <sup>b</sup> NMR yield with 1-iodo-4-methoxybenzene as an internal standard. <sup>c</sup> X = I. <sup>d</sup> X = Br. <sup>e</sup> A solution of **1a** in toluene (1 mL) was added via a syringe pump within 1 h. <sup>f</sup> Isolated yield. <sup>g</sup> One equivalent of H<sub>2</sub>O was added in the reaction. <sup>h</sup> One equivalent of base was used. <sup>i</sup> The ratio of **1a** and **2** was altered. <sup>j</sup> 5 mol % of Pd(OAc)<sub>2</sub> and 10 mol % of PPh<sub>3</sub>. <sup>k</sup> Under air atmosphere.

The reaction conditions were screened with ethyl 2-isobutyl-2-isocyanohept-6-enoate **1a** and iodobenzene as model substrates. However, a reaction of premixed reactants under normal Heck conditions (Pd(OAc)<sub>2</sub>, PPh<sub>3</sub>, Na<sub>2</sub>CO<sub>3</sub> in toluene) yielded only a messy mixture (entry 1, Table 1). When a solution of isocyanide **1a** in toluene was introduced to the reaction mixture slowly, the desired product, ethyl 2-isobutyl-6-methylene-7-phenyl-3,4,5,6-tetrahydro-2*H*-azepine-2-carboxylate **3a**, was formed in 18% NMR yield (entry 2, Table 1). Screening of bases revealed that CsOPiv was the base of choice for this imidoylative Heck reaction, and **3a** could be obtained in 70% yield (entries 3-6). The reaction was equally efficient in DMSO, but less efficient in dioxane or CH<sub>3</sub>CN (entries 7-9). The yield of **3a** was increased to 81% when a solution of **1a** in 1 mL of toluene was added via a syringe pump during 1 h (entry 10). Dppb was also an efficient ligand (entry 11). Other phosphine ligands such as BINAP were tested as well, but resulted in trace product (entry 12). Considering that PPh<sub>3</sub> was an easily available and inexpensive ligand, it was chosen in the reaction. When 1.0 equivalent of H<sub>2</sub>O was added in the reaction, 78% NMR yield of product was generated, indicating that the reaction was well tolerated in moisture (entry 13). When using 1.0 equivalent of base, the yield was decreased to 70% (entry 14). If the ratio between the isocyanide and the aryl iodide are altered, the yield was similar (entry 15). Considering that aryl halides are less expensive than isocyanide, we used it in excess amount. The yield decreased to 45% at 70 °C (entry 16) and 56% with 5 mol % of Pd(OAc)<sub>2</sub> and 10 mol % of PPh<sub>3</sub> (entry 17). No product was generated under air atmosphere (entry 18). When using bromobenzene as the arylating reagent, the same product **3a** was generated in 85% yield at elevated temperature (100 °C, entry 19).

### ***General procedure:***

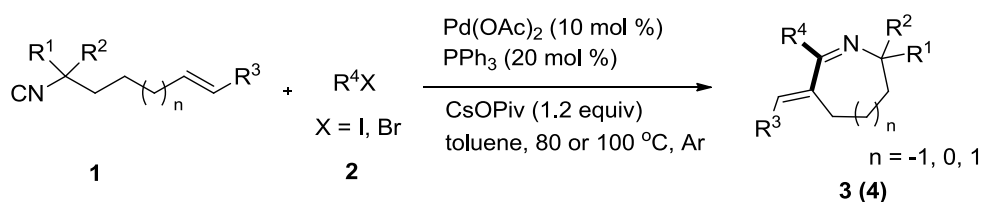

An oven-dried 25 mL Schlenk tube charged with Pd(OAc)<sub>2</sub> (0.02 mmol, 4.5 mg), PPh<sub>3</sub> (0.04 mmol, 10.5 mg) and CsOPiv (0.24 mmol, 56.0 mg) was vacuumed and refilled with Ar for 3 times. Then a solution of **2** (0.3 mmol, 38.4  $\mu$ L) in 1.0 mL of toluene was added via a syringe and the tube was placed in an oil-bath at 80  $^\circ$ C for aryl iodide or 100  $^\circ$ C for aryl bromide. A solution of **1** (0.2 mmol) in 1.0 mL of toluene was introduced with a syringe pump to the reaction mixture during 1 h. The crude reaction mixture was extracted with DCM (20 mL  $\times$  3) and washed with brine (20 mL). The organic phase was concentrated in *vacuo* and the residue was purified by silica gel flash column chromatography to afford the corresponding cyclic imines.

#### IV. Characterization Data

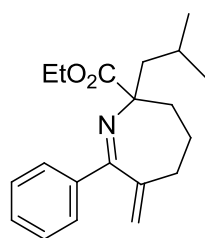

ethyl 2-isobutyl-6-methylene-7-phenyl-3,4,5,6-tetrahydro-2*H*-azepine-2-carboxylate (**3a**)

Prepared from ethyl 2-isobutyl-2-isocyanohept-6-enoate (47.4 mg, 0.2 mmol, 1.0 equiv) and iodobenzene (61 mg, 0.3 mmol, 1.5 equiv) according to the general procedure. Column chromatography purification (EtOAc : petroleum ether 30 : 1) furnished the product **3a** as colorless oil (50 mg, 0.16 mmol, 79% yield). (new compound). <sup>1</sup>H NMR (400 MHz, CDCl<sub>3</sub>):  $\delta$  7.86-7.83 (m, 2H), 7.39-7.33 (m, 3H), 5.40 (d, *J* = 1.2 Hz, 1H), 4.87 (d, *J* = 1.2 Hz, 1H), 4.19-4.03 (m, 2H), 2.41-2.36 (m, 1H), 2.20-2.12 (m, 2H), 2.05-1.96 (m, 2H), 1.89-1.81 (m, 3H), 1.74-1.64 (m, 1H), 1.24 (t, *J* = 7.2 Hz, 3H), 1.02 (d, *J* = 6.8 Hz, 3H), 0.93 (d, *J* = 6.8 Hz, 3H); <sup>13</sup>C NMR (125 MHz, CDCl<sub>3</sub>):  $\delta$  174.4, 170.6, 146.8, 140.6, 129.8, 128.7, 127.9, 118.5, 69.9, 60.5, 51.7, 35.0, 34.0, 25.7, 24.7, 24.7, 23.8, 14.1; HRMS: calcd for C<sub>20</sub>H<sub>28</sub>NO<sub>2</sub>

( $M^+ + H$ ) 314.2115; found 314.2113.

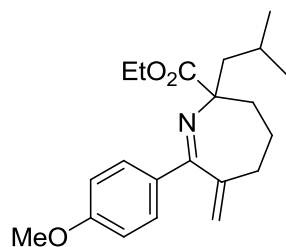

ethyl 2-isobutyl-7-(4-methoxyphenyl)-6-methylene-3,4,5,6-tetrahydro-2*H*-azepine-2-carboxylate (**3b**)

Prepared from ethyl 2-isobutyl-2-isocyanohept-6-enoate (47.4 mg, 0.2 mmol, 1.0 equiv) and 1-iodo-4-methoxybenzene (70 mg, 0.3 mmol, 1.5 equiv) according to the general procedure. Column chromatography purification (EtOAc : petroleum ether 15 : 1) furnished the product **3b** as colorless oil (54 mg, 0.16 mmol, 79% yield). (new compound).  $^1\text{H}$  NMR (500 MHz,  $\text{CDCl}_3$ ):  $\delta$  7.82-7.81 (m, 2H), 6.88-6.86 (m, 2H), 5.38 (d,  $J = 1.0$  Hz, 1H), 4.86 (d,  $J = 1.0$  Hz, 1H), 4.18-4.02 (m, 2H), 3.82 (d,  $J = 6.0$  Hz, 3H), 2.37-2.35 (m, 1H), 2.12-2.11 (m, 2H), 2.03-1.94 (m, 2H), 1.86-1.81 (m, 3H), 1.71-1.61 (m, 1H), 1.24 (t,  $J = 7.5$  Hz, 3H), 1.01 (d,  $J = 6.5$  Hz, 3H), 0.92 (d,  $J = 6.5$  Hz, 3H);  $^{13}\text{C}$  NMR (125 MHz,  $\text{CDCl}_3$ ):  $\delta$  174.6, 170.1, 161.2, 146.8, 133.2, 130.2, 118.2, 113.2, 69.6, 60.4, 55.3, 51.8, 35.1, 34.0, 25.9, 24.7, 24.7, 23.8, 14.1; HRMS: calcd for  $\text{C}_{21}\text{H}_{30}\text{NO}_3$  ( $M^+ + H$ ) 344.2220; found 344.2221.

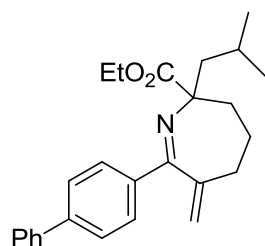

ethyl 7-([1,1'-biphenyl]-4-yl)-2-isobutyl-6-methylene-3,4,5,6-tetrahydro-2*H*-azepine-2-carboxylate (**3c**)

Prepared from ethyl 2-isobutyl-2-isocyanohept-6-enoate (47.4 mg, 0.2 mmol, 1.0 equiv) and 4-iodo-1,1'-biphenyl (84 mg, 0.3 mmol, 1.5 equiv) according to the general procedure. Column chromatography purification (EtOAc : petroleum ether 30 : 1) furnished the product **3c** as colorless oil (60 mg, 0.15 mmol, 77% yield). (new compound).  $^1\text{H}$  NMR (400 MHz,  $\text{CDCl}_3$ ):  $\delta$  7.94-7.92 (m, 2H), 7.63-7.58 (m, 4H), 7.47-7.43 (m, 2H), 7.38-7.34 (m, 1H), 5.44 (d,  $J = 0.8$  Hz, 1H), 4.93 (d,  $J = 0.8$  Hz,

1H), 4.20-4.05 (m, 2H), 2.43-2.40 (m, 1H), 2.19-2.13 (m, 2H), 2.07-1.98 (m, 2H), 1.90-1.84 (m, 3H), 1.76-1.72 (m, 1H), 1.25 (t,  $J = 7.2$  Hz, 3H), 1.03 (d,  $J = 6.4$  Hz, 3H), 0.95 (d,  $J = 6.4$  Hz, 3H);  $^{13}\text{C}$  NMR (125 MHz,  $\text{CDCl}_3$ ):  $\delta$  174.4, 170.2, 146.7, 142.6, 140.8, 139.5, 129.2, 128.8, 127.5, 127.1, 126.7, 118.5, 70.0, 60.5, 51.8 35.1, 34.1, 25.8, 24.7, 24.7, 23.8, 14.1; HRMS: calcd for  $\text{C}_{26}\text{H}_{32}\text{NO}_2$  ( $\text{M}^+ + \text{H}$ ) 390.2428; found 390.2430.

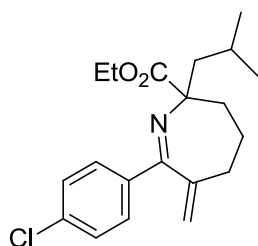

ethyl 7-(4-chlorophenyl)-2-isobutyl-6-methylene-3,4,5,6-tetrahydro-2H-azepine-2-carboxylate (**3d**)

Prepared from ethyl 2-isobutyl-2-isocyanohept-6-enoate (47.4 mg, 0.2 mmol, 1.0 equiv) and 1-chloro-4-iodobenzene (71 mg, 0.3 mmol, 1.5 equiv) according to the general procedure. Column chromatography purification (EtOAc : petroleum ether 30 : 1) furnished the product **3d** as colorless oil (54 mg, 0.16 mmol, 78% yield). (new compound).  $^1\text{H}$  NMR (400 MHz,  $\text{CDCl}_3$ ):  $\delta$  7.78 (d,  $J = 8.4$  Hz, 2H), 7.31 (d,  $J = 8.4$  Hz, 2H), 5.41 (s, 1H), 4.85 (d,  $J = 0.8$  Hz, 1H), 4.20-4.02 (m, 2H), 2.40-2.34 (m, 1H), 2.18-2.10 (m, 2H), 2.03-1.93 (m, 2H), 1.88-1.80 (m, 3H), 1.73-1.67 (m, 1H), 1.23 (t,  $J = 7.2$  Hz, 3H), 1.00 (d,  $J = 6.4$  Hz, 3H), 0.92 (d,  $J = 6.4$  Hz, 3H);  $^{13}\text{C}$  NMR (125 MHz,  $\text{CDCl}_3$ ):  $\delta$  174.1, 169.4, 146.4, 139.0, 136.0, 130.0, 128.1, 118.8, 70.0, 60.5, 51.5, 35.0, 34.0, 25.7, 24.7, 24.7, 23.7, 14.1; HRMS: calcd for  $\text{C}_{20}\text{H}_{27}\text{ClNO}_2$  ( $\text{M}^+ + \text{H}$ ) 348.1725; found 348.1722.

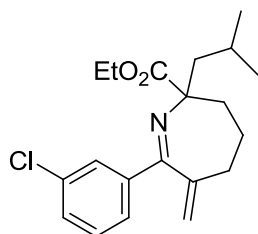

ethyl 7-(3-chlorophenyl)-2-isobutyl-6-methylene-3,4,5,6-tetrahydro-2H-azepine-2-carboxylate (**3e**)

Prepared from ethyl 2-isobutyl-2-isocyanohept-6-enoate (47.4 mg, 0.2 mmol, 1.0

equiv) and 1-chloro-3-iodobenzene (71 mg, 0.3 mmol, 1.5 equiv) according to the general procedure. Column chromatography purification (EtOAc : petroleum ether 30 : 1) furnished the product **3e** as colorless oil (69 mg, 0.19 mmol, 99% yield). (new compound). <sup>1</sup>H NMR (400 MHz, CDCl<sub>3</sub>): δ 7.82 (t, *J* = 1.6 Hz, 1H), 7.71 (d, *J* = 7.6 Hz, 1H), 7.37-7.34 (m, 1H), 7.30-7.26 (m, 1H), 5.42 (d, *J* = 0.8 Hz, 1H), 4.88 (d, *J* = 0.8 Hz, 1H), 4.20-4.04 (m, 2H), 2.39-2.35 (m, 1H), 2.17-2.10 (m, 2H), 2.02-1.94 (m, 2H), 1.89-1.80 (m, 3H), 1.73-1.69 (m, 1H), 1.24 (t, *J* = 6.8 Hz, 3H), 1.00 (d, *J* = 6.4 Hz, 3H), 0.92 (d, *J* = 6.4 Hz, 3H); <sup>13</sup>C NMR (125 MHz, CDCl<sub>3</sub>): δ 174.1, 169.2, 146.2, 142.4, 134.0, 129.8, 129.1, 128.7, 126.9, 119.0, 70.1, 60.6, 51.5, 35.0, 34.0, 25.6, 24.7, 24.6, 23.7, 14.1; HRMS: calcd for C<sub>20</sub>H<sub>27</sub>ClNO<sub>2</sub> (M<sup>+</sup>+H) 348.1725; found 348.1723.

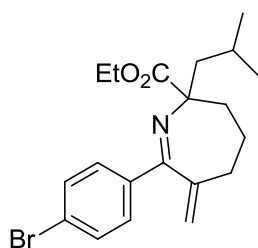

ethyl 7-(4-bromophenyl)-2-isobutyl-6-methylene-3,4,5,6-tetrahydro-2*H*-azepine-2-carboxylate (**3f**)

Prepared from ethyl 2-isobutyl-2-isocyanohept-6-enoate (47.4 mg, 0.2 mmol, 1.0 equiv) and 1-bromo-4-iodobenzene (84 mg, 0.3 mmol, 1.5 equiv) according to the general procedure. Column chromatography purification (EtOAc : petroleum ether 30 : 1) furnished the product **3f** as colorless oil (69 mg, 0.18 mmol, 90% yield). (new compound). <sup>1</sup>H NMR (400 MHz, CDCl<sub>3</sub>): δ 7.71 (d, *J* = 8.4 Hz, 2H), 7.47 (d, *J* = 8.4 Hz, 2H), 5.41 (s, 1H), 4.85 (d, *J* = 0.8 Hz, 1H), 4.20-4.02 (m, 2H), 2.40-2.34 (m, 1H), 2.18-2.10 (m, 2H), 2.03-1.93 (m, 2H), 1.89-1.79 (m, 3H), 1.73-1.67 (m, 1H), 1.23 (t, *J* = 6.8 Hz, 3H), 1.00 (d, *J* = 6.4 Hz, 3H), 0.92 (d, *J* = 6.4 Hz, 3H); <sup>13</sup>C NMR (125 MHz, CDCl<sub>3</sub>): δ 174.1, 169.5, 146.3, 139.4, 131.0, 130.3, 124.5, 118.9, 70.0, 60.5, 51.5, 35.0, 34.0, 25.7, 24.7, 24.6, 23.7, 14.1; HRMS: calcd for C<sub>20</sub>H<sub>27</sub>BrNO<sub>2</sub> (M<sup>+</sup>+H) 392.1220; found 392.1222.

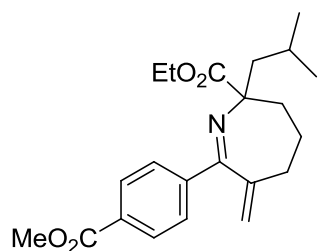

ethyl 7-(4-bromophenyl)-2-isobutyl-6-methylene-3,4,5,6-tetrahydro-2*H*-azepine-2-carboxylate (**3g**)

Prepared from ethyl 2-isobutyl-2-isocyanohept-6-enoate (47.4 mg, 0.2 mmol, 1.0 equiv) and methyl 4-iodobenzoate (78 mg, 0.3 mmol, 1.5 equiv) according to the general procedure. Column chromatography purification (EtOAc : petroleum ether 15 : 1) furnished the product **3g** as yellow oil (57 mg, 0.15 mmol, 77% yield). (new compound). <sup>1</sup>H NMR (400 MHz, CDCl<sub>3</sub>): δ 8.01 (d, *J* = 8.4 Hz, 2H), 7.88 (d, *J* = 8.4 Hz, 2H), 5.42 (s, 1H), 4.85 (s, 1H), 4.19-4.04 (m, 2H), 3.93 (s, 3H), 2.42-2.36 (m, 1H), 2.21-2.11 (m, 2H), 2.03-1.94 (m, 2H), 1.89-1.80 (m, 3H), 1.80-1.72 (m, 1H), 1.23 (t, *J* = 6.8 Hz, 3H), 1.00 (d, *J* = 6.4 Hz, 3H), 0.92 (d, *J* = 6.4 Hz, 3H); <sup>13</sup>C NMR (125 MHz, CDCl<sub>3</sub>): δ 174.0, 169.8, 166.9, 146.4, 144.8, 131.1, 129.2, 128.7, 119.1, 70.3, 60.6, 52.1, 51.5, 35.0, 34.0, 25.6, 24.7, 24.6, 23.7, 14.1; HRMS: calcd for C<sub>22</sub>H<sub>30</sub>NO<sub>4</sub> (M<sup>+</sup>+H) 372.2169; found 372.2171.

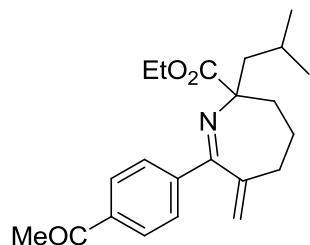

ethyl 7-(4-acetylphenyl)-2-isobutyl-6-methylene-3,4,5,6-tetrahydro-2*H*-azepine-2-carboxylate (**3h**)

Prepared from ethyl 2-isobutyl-2-isocyanohept-6-enoate (47.4 mg, 0.2 mmol, 1.0 equiv) and 1-(4-iodophenyl)ethanone (74 mg, 0.3 mmol, 1.5 equiv) according to the general procedure. Column chromatography purification (EtOAc : petroleum ether 15 : 1) furnished the product **3h** as yellow oil (70 mg, 0.19 mmol, 99% yield). (new compound). <sup>1</sup>H NMR (400 MHz, CDCl<sub>3</sub>): δ 7.94-7.89 (m, 4H), 5.43 (d, *J* = 1.2 Hz, 1H), 4.85 (d, *J* = 1.2 Hz, 1H), 4.19-4.04 (m, 2H), 2.60 (s, 3H), 2.41-2.36 (m, 1H), 2.19-2.10 (m, 2H), 2.03-1.94 (m, 2H), 1.90-1.81 (m, 3H), 1.74-1.70 (m, 1H), 1.23 (t, *J* = 7.2 Hz, 3H), 1.00 (d, *J* = 6.4 Hz, 3H), 0.92 (d, *J* = 6.4 Hz, 3H); <sup>13</sup>C NMR (125 MHz,



CDCl<sub>3</sub>):  $\delta$  197.8, 174.0, 169.7, 146.4, 144.8, 137.8, 128.9, 127.9, 119.0, 70.3, 60.6, 51.5, 35.0, 34.0, 26.7, 25.6, 24.7, 24.6, 23.7, 14.1; HRMS: calcd for C<sub>22</sub>H<sub>30</sub>NO<sub>3</sub> (M<sup>+</sup>+H) 356.2220; found 356.2220.

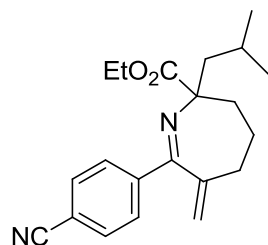

ethyl 7-(4-cyanophenyl)-2-isobutyl-6-methylene-3,4,5,6-tetrahydro-2*H*-azepine-2-carboxylate (**3i**)

Prepared from ethyl 2-isobutyl-2-isocyanohept-6-enoate (47.4 mg, 0.2 mmol, 1.0 equiv) and 4-iodobenzonitrile (69 mg, 0.3 mmol, 1.5 equiv) according to the general procedure. Column chromatography purification (EtOAc : petroleum ether 15 : 1) furnished the product **3i** as yellow oil (67 mg, 0.19 mmol, 99% yield). (new compound). <sup>1</sup>H NMR (400 MHz, CDCl<sub>3</sub>):  $\delta$  7.92 (d, *J* = 8.4 Hz, 2H), 6.30 (d, *J* = 8.4 Hz, 2H), 5.45 (d, *J* = 0.8 Hz, 1H), 4.85 (d, *J* = 0.8 Hz, 1H), 4.19-4.05 (m, 2H), 2.40-2.36 (m, 1H), 2.18-2.10 (m, 2H), 2.00-1.78 (m, 5H), 1.74-1.67 (m, 1H), 1.23 (t, *J* = 7.2 Hz, 3H), 0.99 (d, *J* = 6.4 Hz, 3H), 0.91 (d, *J* = 6.4 Hz, 3H); <sup>13</sup>C NMR (125 MHz, CDCl<sub>3</sub>):  $\delta$  173.7, 168.9, 145.9, 144.6, 131.7, 129.2, 119.4, 118.7, 113.2, 70.5, 60.7, 51.3, 35.0, 34.0, 25.5, 24.7, 24.6, 23.6, 14.1; HRMS: calcd for C<sub>21</sub>H<sub>27</sub>N<sub>2</sub>O<sub>2</sub> (M<sup>+</sup>+H) 339.2067; found 339.2071.

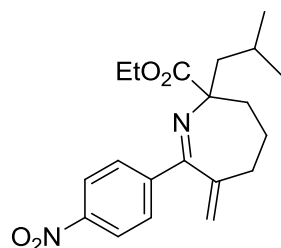

ethyl 2-isobutyl-6-methylene-7-(4-nitrophenyl)-3,4,5,6-tetrahydro-2*H*-azepine-2-carboxylate (**3j**)

Prepared from ethyl 2-isobutyl-2-isocyanohept-6-enoate (47.4 mg, 0.2 mmol, 1.0 equiv) and 1-iodo-4-nitrobenzene (74 mg, 0.3 mmol, 1.5 equiv) according to the general procedure. Column chromatography purification (EtOAc : petroleum ether 15 : 1) furnished the product **3j** as yellow oil (69 mg, 0.19 mmol, 97% yield). (new

compound).  $^1\text{H}$  NMR (400 MHz,  $\text{CDCl}_3$ ):  $\delta$  8.21-8.17 (m, 2H), 8.00-7.96 (m, 2H), 5.47 (d,  $J = 0.8$  Hz, 1H), 4.87 (d,  $J = 0.8$  Hz, 2H), 4.20-4.06 (m, 2H), 2.41-2.38 (m, 1H), 2.18-2.11 (m, 2H), 2.02-1.82 (m, 5H), 1.76-1.71 (m, 1H), 1.24 (t,  $J = 7.2$  Hz, 3H), 1.00 (d,  $J = 6.4$  Hz, 3H), 0.92 (d,  $J = 6.4$  Hz, 3H);  $^{13}\text{C}$  NMR (125 MHz,  $\text{CDCl}_3$ ):  $\delta$  173.6, 168.6, 148.6, 146.3, 146.0, 129.5, 123.1, 119.5, 70.6, 60.7, 51.2, 35.0, 34.0, 25.5, 24.7, 24.6, 23.6, 14.1; HRMS: calcd for  $\text{C}_{20}\text{H}_{27}\text{N}_2\text{O}_4$  ( $\text{M}^+ + \text{H}$ ) 359.1965; found 359.1963.

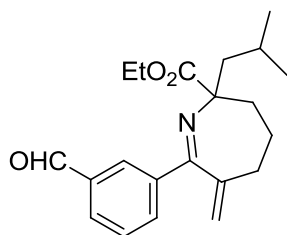

ethyl 7-(3-formylphenyl)-2-isobutyl-6-methylene-3,4,5,6-tetrahydro-2H-azepine-2-carboxylate (**3k**)

Prepared from ethyl 2-isobutyl-2-isocyanohept-6-enoate (47.4 mg, 0.2 mmol, 1.0 equiv) and 3-iodobenzaldehyde (70 mg, 0.3 mmol, 1.5 equiv) according to the general procedure. Column chromatography purification (EtOAc : petroleum ether 15 : 1) furnished the product **3k** as colorless oil (68 mg, 0.19 mmol, 99% yield). (new compound).  $^1\text{H}$  NMR (400 MHz,  $\text{CDCl}_3$ ):  $\delta$  10.0 (s, 1H), 8.29 (t,  $J = 1.2$  Hz, 1H), 8.16 (ddd,  $J = 8.0, 1.2, 1.2$  Hz, 1H), 7.91 (ddd,  $J = 8.0, 1.2, 1.2$  Hz, 1H), 7.51 (t,  $J = 7.6$  Hz, 1H), 5.46 (s, 1H), 4.89 (d,  $J = 0.8$  Hz, 1H), 4.20-4.05 (m, 2H), 2.43-2.38 (m, 1H), 2.21-2.11 (m, 2H), 2.03-1.95 (m, 2H), 1.90-1.81 (m, 3H), 1.75-1.71 (m, 1H), 1.24 (t,  $J = 7.2$  Hz, 3H), 1.00 (d,  $J = 6.4$  Hz, 3H), 0.93 (d,  $J = 6.4$  Hz, 3H);  $^{13}\text{C}$  NMR (125 MHz,  $\text{CDCl}_3$ ):  $\delta$  192.2, 174.0, 169.3, 146.1, 141.6, 136.2, 134.5, 130.5, 130.5, 128.7, 119.3, 70.2, 60.6, 51.4, 35.0, 34.0, 25.6, 24.7, 24.6, 23.7, 14.1; HRMS: calcd for  $\text{C}_{21}\text{H}_{28}\text{NO}_3$  ( $\text{M}^+ + \text{H}$ ) 342.2064; found 342.2065.

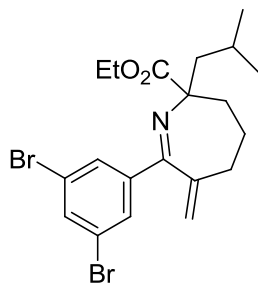

ethyl 7-(3,5-dibromophenyl)-2-isobutyl-6-methylene-3,4,5,6-tetrahydro-2*H*-azepine-2-carboxylate (**3l**)

Prepared from ethyl 2-isobutyl-2-isocyanohept-6-enoate (47.4 mg, 0.2 mmol, 1.0 equiv) and 1,3-dibromo-5-iodobenzene (108 mg, 0.3 mmol, 1.5 equiv) according to the general procedure. Column chromatography purification (EtOAc : petroleum ether 30 : 1) furnished the product **3l** as yellow oil (79 mg, 0.17 mmol, 84% yield). (new compound). <sup>1</sup>H NMR (400 MHz, CDCl<sub>3</sub>): δ 7.89 (d, *J* = 2.0 Hz, 2H), 7.67 (t, *J* = 1.6 Hz, 1H), 5.45 (s, 1H), 4.89 (s, 1H), 4.19-4.05 (m, 2H), 2.39-2.33 (m, 1H), 2.16-2.10 (m, 2H), 1.98-1.78 (m, 5H), 1.71-1.65 (m, 1H), 1.24 (t, *J* = 7.2 Hz, 3H), 0.99 (d, *J* = 6.4 Hz, 3H), 0.92 (d, *J* = 6.4 Hz, 3H); <sup>13</sup>C NMR (125 MHz, CDCl<sub>3</sub>): δ 173.8, 167.8, 145.6, 143.9, 135.1, 130.5, 122.6, 119.6, 70.3, 60.8, 51.3, 34.9, 33.9, 25.6, 24.7, 24.7, 23.8, 14.2; HRMS: calcd for C<sub>20</sub>H<sub>26</sub>Br<sub>2</sub>NO<sub>2</sub> (M<sup>+</sup>+H) 470.0325; found 470.0323.

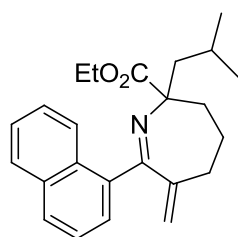

ethyl 2-isobutyl-6-methylene-7-(naphthalen-1-yl)-3,4,5,6-tetrahydro-2*H*-azepine-2-carboxylate (**3m**)

Prepared from ethyl 2-isobutyl-2-isocyanohept-6-enoate (47.4 mg, 0.2 mmol, 1.0 equiv) and 1-iodonaphthalene (76 mg, 0.3 mmol, 1.5 equiv) according to the general procedure. Column chromatography purification (EtOAc : petroleum ether 30 : 1) furnished the product **3m** as colorless oil (43 mg, 0.17 mmol, 59% yield). (new compound). <sup>1</sup>H NMR (400 MHz, CDCl<sub>3</sub>): δ 8.33-8.31 (m, 1H), 7.84-7.82 (m, 2H), 7.51-7.42 (m, 4H), 5.27 (s, 1H), 4.83 (s, 1H), 4.26-4.15 (m, 2H), 2.65-2.59 (m, 1H), 2.49-2.42 (m, 1H), 2.34-2.30 (m, 1H), 2.10-2.04 (m, 1H), 2.03-2.00 (m, 2H), 1.97-1.84 (m, 3H), 1.31 (t, *J* = 7.6 Hz, 3H), 0.95-0.92 (m, 6H); <sup>13</sup>C NMR (125 MHz, CDCl<sub>3</sub>): δ 174.2, 171.7, 148.7, 141.4, 133.9, 131.5, 128.8, 128.1, 127.0, 126.6, 125.9, 125.6, 124.8, 120.8, 70.8, 60.8, 52.7, 35.3, 34.2, 24.9, 24.7, 24.4, 23.6, 14.1; HRMS: calcd for C<sub>24</sub>H<sub>30</sub>NO<sub>2</sub> (M<sup>+</sup>+H) 364.2271; found 364.2273.

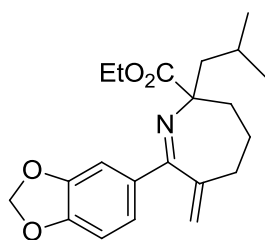

ethyl 7-(benzo[d][1,3]dioxol-5-yl)-2-isobutyl-6-methylene-3,4,5,6-tetrahydro-2*H*-azepine-2-carboxylate (**3n**)

Prepared from ethyl 2-isobutyl-2-isocyanohept-6-enoate (47.4 mg, 0.2 mmol, 1.0 equiv) and 5-bromobenzo[d][1,3]dioxole (49 mg, 0.3 mmol, 1.5 equiv) according to the procedure A. Column chromatography purification (EtOAc : petroleum ether 15 : 1) furnished the product **3n** as colorless oil (79 mg, 0.13 mmol, 66% yield). (new compound).  $^1\text{H}$  NMR (500 MHz,  $\text{CDCl}_3$ ):  $\delta$  7.52 (d,  $J = 1.0$  Hz, 1H), 7.35 (dd,  $J = 6.4, 1.5$  Hz, 1H), 6.81 (d,  $J = 6.4$  Hz, 1H), 6.02 (d,  $J = 1.0$  Hz, 2H), 5.42 (s, 1H), 4.91 (s, 1H), 4.23-4.05 (m, 2H), 2.41-2.36 (m, 1H), 2.18-2.15 (m, 2H), 2.06-1.98 (m, 3H), 1.89-1.85 (m, 2H), 1.74-1.70 (m, 1H), 1.27 (t,  $J = 7.0$  Hz, 3H), 1.04 (d,  $J = 7.0$  Hz, 3H), 0.96 (d,  $J = 7.0$  Hz, 3H);  $^{13}\text{C}$  NMR (125 MHz,  $\text{CDCl}_3$ ):  $\delta$  174.5, 169.8, 149.3, 147.6, 146.7, 135.1, 123.9, 118.4, 108.6, 107.3, 101.3, 70.0, 60.5, 51.8, 35.1, 34.0, 25.9, 24.7, 24.7, 23.8, 14.1; HRMS: calcd for  $\text{C}_{21}\text{H}_{28}\text{NO}_4$  ( $\text{M}^+ + \text{H}$ ) 358.2013; found 358.2011

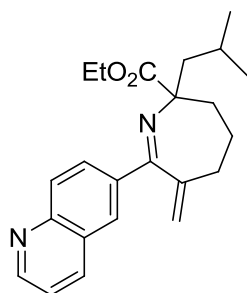

ethyl 2-isobutyl-6-methylene-7-(quinolin-6-yl)-3,4,5,6-tetrahydro-2*H*-azepine-2-carboxylate (**3o**)

Prepared from ethyl 2-isobutyl-2-isocyanohept-6-enoate (47.4 mg, 0.2 mmol, 1.0 equiv) and 6-iodoquinoline (77 mg, 0.3 mmol, 1.5 equiv) according to the general procedure. Column chromatography purification (EtOAc : petroleum ether 15 : 1) furnished the product **3o** as yellow oil (72 mg, 0.19 mmol, 99% yield). (new compound).  $^1\text{H}$  NMR (400 MHz,  $\text{CDCl}_3$ ):  $\delta$  8.92 (dd,  $J = 4.0, 1.6$  Hz, 1H), 8.37 (dd,  $J = 8.4, 1.2$  Hz, 1H), 8.20-8.18 (m, 2H), 8.09 (d,  $J = 8.8$  Hz, 1H), 7.41 (dd,  $J = 4.4, 4.0$

Hz, 1H), 5.50 (s, 1H), 4.94 (d,  $J = 1.2$  Hz, 1H), 4.22-4.06 (m, 2H), 2.47-2.42 (m, 1H), 2.25-2.15 (m, 2H), 2.09-2.00 (m, 2H), 1.93-1.86 (m, 3H), 1.78-1.73 (m, 1H), 1.25 (t,  $J = 7.2$  Hz, 3H), 1.05 (d,  $J = 6.4$  Hz, 3H), 0.96 (d,  $J = 6.4$  Hz, 3H);  $^{13}\text{C}$  NMR (125 MHz,  $\text{CDCl}_3$ ):  $\delta$  174.2, 169.8, 151.0, 149.2, 146.4, 138.4, 136.9, 129.4, 129.1, 128.8, 127.6, 121.2, 118.9, 70.2, 60.6, 51.6, 35.0, 34.0, 25.8, 24.7, 24.7, 23.8, 14.1; HRMS: calcd for  $\text{C}_{23}\text{H}_{29}\text{N}_2\text{O}_2$  ( $\text{M}^+ + \text{H}$ ) 365.2224; found 365.2223.

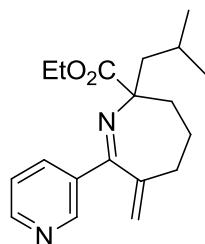

ethyl 2-isobutyl-6-methylene-7-(pyridin-3-yl)-3,4,5,6-tetrahydro-2H-azepine-2-carboxylate (**3p**)

Prepared from ethyl 2-isobutyl-2-isocyanohept-6-enoate (47.4 mg, 0.2 mmol, 1.0 equiv) and 3-iodopyridine (62 mg, 0.3 mmol, 1.5 equiv) according to the general procedure. Column chromatography purification (EtOAc : petroleum ether 15 : 1) furnished the product **3p** as yellow oil (55 mg, 0.17 mmol, 87% yield). (new compound).  $^1\text{H}$  NMR (400 MHz,  $\text{CDCl}_3$ ):  $\delta$  9.00 (d,  $J = 1.6$  Hz, 1H), 8.62 (dd,  $J = 4.8, 1.6$  Hz, 1H), 8.15 (ddd,  $J = 8.0, 2.0, 2.0$  Hz, 1H), 7.32-7.28 (m, 1H), 5.48 (d,  $J = 0.8$  Hz, 1H), 4.92 (d,  $J = 0.8$  Hz, 1H), 4.21-4.07 (m, 2H), 2.44-2.39 (m, 1H), 2.22-2.13 (m, 2H), 2.05-1.72 (m, 6H), 1.26 (t,  $J = 7.2$  Hz, 3H), 1.01 (d,  $J = 6.4$  Hz, 3H), 0.93 (d,  $J = 6.4$  Hz, 3H);  $^{13}\text{C}$  NMR (125 MHz,  $\text{CDCl}_3$ ):  $\delta$  173.9, 168.5, 150.6, 150.3, 146.1, 136.2, 135.9, 122.9, 119.5, 70.4, 60.7, 51.5, 35.2, 34.1, 25.6, 24.7, 24.7, 23.6, 14.1; HRMS: calcd for  $\text{C}_{19}\text{H}_{27}\text{N}_2\text{O}_2$  ( $\text{M}^+ + \text{H}$ ) 315.2067; found 315.2067.

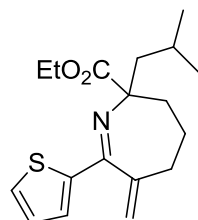

ethyl  
2-isobutyl-6-methylene-7-(thiophen-2-yl)-3,4,5,6-tetrahydro-2H-azepine-2-carboxylate (**3q**)

Prepared from ethyl 2-isobutyl-2-isocyanohept-6-enoate (47.4 mg, 0.2 mmol, 1.0 equiv) and 2-iodothiophene (63 mg, 0.3 mmol, 1.5 equiv) according to the general procedure. Column chromatography purification (EtOAc : petroleum ether 15 : 1) furnished the product **3q** as colorless oil (35 mg, 0.11 mmol, 55% yield). (new compound).  $^1\text{H}$  NMR (400 MHz,  $\text{CDCl}_3$ ):  $\delta$  7.37-7.36 (m, 1H), 7.28-7.26 (m, 1H), 7.00-6.98 (m, 1H), 5.40 (s, 1H), 5.11 (d,  $J = 1.2$  Hz, 1H), 4.18-4.05 (m, 2H), 2.35-2.30 (m, 1H), 2.13-2.07 (m, 2H), 2.00-1.91 (m, 1H), 1.90-1.80 (m, 3H), 1.77-1.64 (m, 1H), 1.23 (t,  $J = 7.2$  Hz, 3H), 1.01 (d,  $J = 6.4$  Hz, 3H), 0.91 (d,  $J = 6.4$  Hz, 3H);  $^{13}\text{C}$  NMR (125 MHz,  $\text{CDCl}_3$ ):  $\delta$  174.2, 165.2, 148.1, 145.9, 123.0, 129.5, 127.0, 118.3, 70.1, 60.6, 51.6, 35.6, 33.9, 26.0, 24.8, 24.7, 23.8, 14.2; HRMS: calcd for  $\text{C}_{18}\text{H}_{26}\text{NO}_2\text{S}$  ( $\text{M}^+ + \text{H}$ ) 320.1679; found 320.1680.

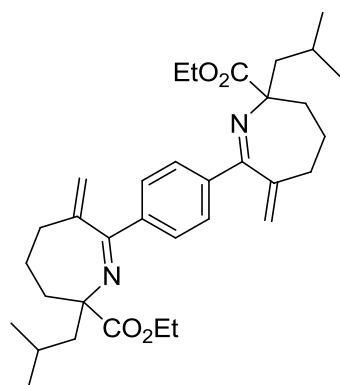

diethyl 7,7'-(1,4-phenylene)bis(2-isobutyl-6-methylene-3,4,5,6-tetrahydro-2H-azepine-2-carboxylate) (**3r**)

**Procedure:** An oven-dried 25 mL Schlenk tube charged with  $\text{Pd}(\text{OAc})_2$  (0.02 mmol, 4.5 mg),  $\text{PPh}_3$  (0.04 mmol, 10.5 mg), 1,4-diiodobenzene (0.1 mmol, 33 mg) and  $\text{CsOPiv}$  (0.24 mmol, 56.0 mg) was vacuumed and refilled with Ar for 3 times. Then the tube was placed in an oil-bath at 80 °C. A solution of ethyl 2-isobutyl-2-isocyanohept-6-enoate (47.4 mg, 0.2 mmol) in 1.0 mL of toluene was added dropwise with a syringe pump within 1 h. The crude reaction mixture was extracted with DCM (20 mL  $\times$  3) and washed with brine (20 mL). The organic phase was concentrated in *vacuo* and the residue was purified by silica gel flash column chromatography to afford **3r** as colorless oil (42 mg, 0.15 mmol, 76% yield). (new compound).  $^1\text{H}$  NMR (400 MHz,  $\text{CDCl}_3$ ):  $\delta$  7.81 (s, 4H), 5.39 (s, 2H), 4.85 (s, 2H), 4.19-4.00 (m, 4H), 2.41-2.35 (m, 2H), 2.19-2.12 (m, 4H), 2.06-1.94 (m, 4H), 1.88-1.79 (m, 6H), 1.74-1.68 (m, 2H), 1.22 (t,  $J = 7.2$  Hz, 6H), 1.00 (d,  $J = 6.4$  Hz,

6H), 0.92 (d,  $J = 6.4$  Hz, 6H);  $^{13}\text{C}$  NMR (125 MHz,  $\text{CDCl}_3$ ):  $\delta$  174.4, 170.3, 146.7, 141.9, 128.3, 118.7, 70.1, 60.5, 51.8, 35.1, 34.0, 25.7, 24.7, 24.7, 23.8, 14.1; HRMS: calcd for  $\text{C}_{34}\text{H}_{49}\text{N}_2\text{O}_4$  ( $\text{M}^+ + \text{H}$ ) 549.3687; found 549.3685.

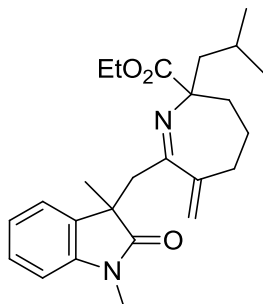

ethyl 7-((1,3-dimethyl-2-oxoindolin-3-yl)methyl)-2-isobutyl-6-methylene-3,4,5,6-tetrahydro-2H-azepine-2-carboxylate (**3s**)

Prepared from ethyl 2-isobutyl-2-isocyanohept-6-enoate (47.4 mg, 0.2 mmol, 1.0 equiv) and *N*-(2-iodophenyl)-*N*-methylethacrylamide (91 mg, 0.3 mmol, 1.5 equiv) according to the general procedure. Column chromatography purification (EtOAc : petroleum ether 10 : 1) furnished the product **3s** as yellow solid (50 mg, 0.12 mmol, 61% yield). (new compound).  $^1\text{H}$  NMR (500 MHz,  $\text{CDCl}_3$ ):  $\delta$  7.22-7.17 (m, 2H), 7.00-6.98 (m, 1H), 6.79-6.76 (m, 1H), 5.03-5.01 (m, 1H), 4.92-4.91 (m, 1H), 4.06-3.90 (m, 2H), 3.32-3.28 (m, 1H), 3.19-3.17 (m, 2H), 3.03-2.98 (m, 1H), 1.84-1.82 (m, 1H), 1.69-1.54 (m, 4H), 1.52-1.32 (m, 6H), 1.26-1.10 (m, 5H), 0.80-0.68 (m, 6H);  $^{13}\text{C}$  NMR (125 MHz,  $\text{CDCl}_3$ ):  $\delta$  180.4, 174.4, 168.5, 148.4, 143.8, 134.0, 127.3, 122.8, 121.8, 115.7, 107.6, 69.4, 60.4, 49.0, 48.6, 46.9, 34.4, 32.9, 26.2, 25.7, 24.3, 24.3, 24.0, 23.5, 14.1; HRMS: calcd for  $\text{C}_{25}\text{H}_{35}\text{N}_2\text{O}_3$  ( $\text{M}^+ + \text{H}$ ) 411.2642; found 411.2645.

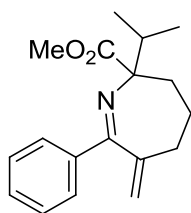

methyl 2-isopropyl-6-methylene-7-phenyl-3,4,5,6-tetrahydro-2H-azepine-2-carboxylate (**4a**)

Prepared from methyl 2-isocyano-2-isopropylhept-6-enoate (42 mg, 0.2 mmol, 1.0 equiv) and iodobenzene (61 mg, 0.3 mmol, 1.5 equiv) according to the general

procedure. Column chromatography purification (EtOAc : petroleum ether 30 : 1) furnished the product **4a** as colorless oil (56 mg, 0.19 mmol, 99% yield). (new compound).  $^1\text{H}$  NMR (400 MHz,  $\text{CDCl}_3$ ):  $\delta$  7.90 (dd,  $J = 8.0, 1.6$  Hz, 2H), 7.42-7.26 (m, 3H), 5.39 (s, 1H), 4.87 (d,  $J = 1.2$  Hz, 1H), 3.60 (s, 3H), 2.45-2.39 (m, 1H), 2.22-2.04 (m, 3H), 1.86-1.79 (m, 2H), 1.71-1.64 (m, 1H), 1.07 (d,  $J = 6.4$  Hz, 3H), 1.04 (d,  $J = 6.4$  Hz, 3H);  $^{13}\text{C}$  NMR (125 MHz,  $\text{CDCl}_3$ ):  $\delta$  174.2, 170.9, 146.2, 140.2, 129.8, 128.6, 127.8, 118.0, 72.6, 51.1, 40.2, 33.6, 31.8, 26.2, 18.4, 16.9; HRMS: calcd for  $\text{C}_{18}\text{H}_{24}\text{NO}_2$  ( $\text{M}^+ + \text{H}$ ) 286.1802; found 286.1800.

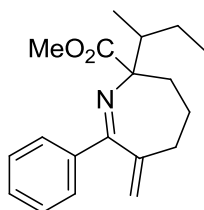

methyl 2-(sec-butyl)-6-methylene-7-phenyl-3,4,5,6-tetrahydro-2H-azepine-2-carboxylate (**4b**)

Prepared from methyl 2-(sec-butyl)-2-isocyanohept-6-enoate (45 mg, 0.2 mmol, 1.0 equiv) and iodobenzene (61 mg, 0.3 mmol, 1.5 equiv) according to the general procedure. Column chromatography purification (EtOAc : petroleum ether 30 : 1) furnished the product **4b** as colorless oil (55 mg, 0.18 mmol, 92% yield). (new compound).  $^1\text{H}$  NMR (400 MHz,  $\text{CDCl}_3$ ):  $\delta$  7.90-7.88 (m, 2H), 7.40-7.33 (m, 3H), 5.38 (s, 1H), 4.86 (d,  $J = 1.2$  Hz, 1H), 3.60 (s, 3H), 2.44-2.38 (m, 1H), 2.15-2.07 (m, 2H), 1.94-1.64 (m, 5H), 1.40-1.21 (m, 1H), 1.07-0.94 (m, 6H);  $^{13}\text{C}$  NMR (125 MHz,  $\text{CDCl}_3$ ):  $\delta$  174.3, 170.7, 146.2, 140.1, 129.8, 128.6, 127.8, 117.9, 73.2, 51.1, 47.3, 33.4, 31.4, 25.8, 24.8, 13.0, 12.7; HRMS: calcd for  $\text{C}_{19}\text{H}_{26}\text{NO}_2$  ( $\text{M}^+ + \text{H}$ ) 300.1958; found 300.1955.

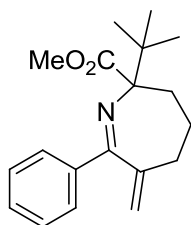

methyl 2-(tert-butyl)-6-methylene-7-phenyl-3,4,5,6-tetrahydro-2H-azepine-2-carboxylate (**4c**)

Prepared from methyl 2-(tert-butyl)-2-isocyanohept-6-enoate (45 mg, 0.2 mmol,



1.0 equiv) and iodobenzene (61 mg, 0.3 mmol, 1.5 equiv) according to the general procedure. Column chromatography purification (EtOAc : petroleum ether 30 : 1) furnished the product **4c** as colorless solid (50 mg, 0.16 mmol, 83% yield). (new compound). <sup>1</sup>H NMR (400 MHz, CDCl<sub>3</sub>): δ 7.95-7.91 (m, 2H), 7.43-7.35 (m, 3H), 5.36 (s, 1H), 4.78 (s, 1H), 3.54 (s, 3H), 2.40-2.29 (m, 2H), 2.05-1.80 (m, 3H), 1.53-1.49 (m, 1H), 1.12 (s, 9H); <sup>13</sup>C NMR (125 MHz, CDCl<sub>3</sub>): δ 173.1, 169.9, 146.4, 139.8, 129.8, 128.4, 127.9, 116.7, 74.3, 50.6, 39.9, 33.5, 28.4, 26.5, 26.1; HRMS: calcd for C<sub>19</sub>H<sub>26</sub>NO<sub>2</sub> (M<sup>+</sup>+H) 300.1958; found 300.1958.

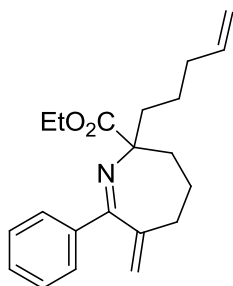

ethyl 6-methylene-2-(pent-4-en-1-yl)-7-phenyl-3,4,5,6-tetrahydro-2*H*-azepine-2-carboxylate (**4d**)

Prepared from ethyl 2-isocyano-2-(pent-4-en-1-yl)hept-6-enoate (50 mg, 0.2 mmol, 1.0 equiv) and iodobenzene (61 mg, 0.3 mmol, 1.5 equiv) according to the general procedure. Column chromatography purification (EtOAc : petroleum ether 30 : 1) furnished the product **4d** as colorless oil (59 mg, 0.16 mmol, 83% yield). (new compound). <sup>1</sup>H NMR (400 MHz, CDCl<sub>3</sub>): δ 7.83 (dd, *J* = 8.0, 1.2 Hz, 2H), 7.39-7.33 (m, 3H), 5.88-5.81 (m, 1H), 5.39 (s, 1H), 5.06-4.95 (m, 2H), 4.86 (d, *J* = 1.2 Hz, 1H), 4.18-4.03 (m, 2H), 2.43-2.39 (m, 1H), 2.19-2.08 (m, 4H), 2.00-1.93 (m, 2H), 1.87-1.79 (m, 3H), 1.72-1.60 (m, 1H), 1.50-1.40 (m, 1H), 1.22 (t, *J* = 6.8 Hz, 3H); <sup>13</sup>C NMR (125 MHz, CDCl<sub>3</sub>): δ 173.9, 171.2, 146.7, 140.5, 138.9, 129.9, 128.7, 127.9, 118.7, 114.4, 69.9, 60.5, 43.3, 34.0, 34.0, 25.9, 23.6, 14.2; HRMS: calcd for C<sub>21</sub>H<sub>28</sub>NO<sub>2</sub> (M<sup>+</sup>+H) 326.2115; found 326.2119.

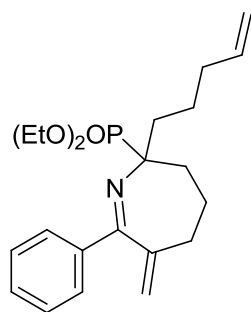

diethyl (6-methylene-2-(pent-4-en-1-yl)-7-phenyl-3,4,5,6-tetrahydro-2H-azepin-2-yl) phosphonate (**4e**)

Prepared from diethyl (6-isocyanoundeca-1,10-dien-6-yl)phosphonate (63 mg, 0.2 mmol, 1.0 equiv) and iodobenzene (61 mg, 0.3 mmol, 1.5 equiv) according to the general procedure. Column chromatography purification (EtOAc : petroleum ether 15 : 1) furnished the product **4e** as yellow oil (63 mg, 0.16 mmol, 81% yield). (new compound).  $^1\text{H}$  NMR (400 MHz,  $\text{CDCl}_3$ ):  $\delta$  7.77 (d,  $J$  = 6.8 Hz, 2H), 7.37-7.30 (m, 3H), 5.78-5.74 (m, 1H), 5.42 (s, 1H), 5.00-4.91 (m, 3H), 4.27-4.14 (m, 4H), 2.55-2.52 (m, 1H), 2.37-2.25 (m, 1H), 2.20-1.79 (m, 7H), 1.60-1.49 (m, 2H), 1.34-1.26 (m, 6H);  $^{13}\text{C}$  NMR (125 MHz,  $\text{CDCl}_3$ ):  $\delta$  169.8 (d,  $J$  = 24.3 Hz), 146.7, 141.0, 139.0, 130.1, 129.0, 128.1, 119.5, 114.9, 68.4 (d,  $J$  = 169.5 Hz), 63.1 (d,  $J$  = 7.5 Hz), 35.5, 34.6, 33.5, 31.2 (d,  $J$  = 153.3 Hz), 30.0, 29.7, 23.8 (d,  $J$  = 3.1 Hz), 23.2 (d,  $J$  = 12.4 Hz), 16.9 (t,  $J$  = 6.3 Hz); HRMS: calcd for  $\text{C}_{22}\text{H}_{33}\text{NO}_3\text{P}$  ( $\text{M}^+ + \text{H}$ ) 390.2193; found 390.2186.

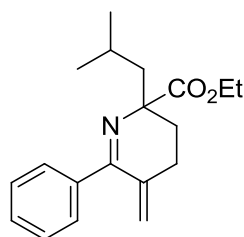

ethyl 2-isobutyl-5-methylene-6-phenyl-2,3,4,5-tetrahydropyridine-2-carboxylate (**4f**)

Prepared from ethyl 2-isobutyl-2-isocyanohex-5-enoate (45 mg, 0.2 mmol, 1.0 equiv) and iodobenzene (61 mg, 0.3 mmol, 1.5 equiv) according to the procedure but in THF as a solvent. Column chromatography purification (EtOAc : petroleum ether 30 : 1) furnished the product **4f** as colorless oil (46 mg, 0.15 mmol, 77% yield). (new compound).  $^1\text{H}$  NMR (400 MHz,  $\text{CDCl}_3$ ):  $\delta$  7.49-7.47 (m, 2H), 7.36-7.35 (m, 3H), 5.38 (s, 1H), 5.25 (s, 1H), 4.23-4.12 (m, 2H), 2.54-2.51 (m, 2H), 2.25-2.19 (m, 1H), 1.99-1.73 (m, 4H), 1.27 (t,  $J$  = 6.8 Hz, 3H), 0.97 (d,  $J$  = 6.4 Hz, 3H), 0.95 (d,  $J$  = 6.4

Hz, 3H);  $^{13}\text{C}$  NMR (125 MHz,  $\text{CDCl}_3$ ):  $\delta$  174.3, 167.3, 139.8, 137.6, 128.9, 128.7, 127.8, 121.8, 66.9, 61.0, 48.5, 31.2, 26.4, 24.7, 24.4, 24.0, 14.2; HRMS: calcd for  $\text{C}_{19}\text{H}_{26}\text{NO}_2$  ( $\text{M}^+ + \text{H}$ ) 300.1958; found 300.1960.

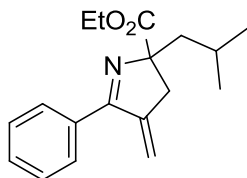

ethyl 2-isobutyl-4-methylene-5-phenyl-3,4-dihydro-2*H*-pyrrole-2-carboxylate (**4g**)

Prepared from ethyl 2-isobutyl-2-isocyanopent-4-enoate (42 mg, 0.2 mmol, 1.0 equiv) and iodobenzene (61 mg, 0.3 mmol, 1.5 equiv) according to the general procedure. Column chromatography purification (EtOAc : petroleum ether 30 : 1) furnished the product **4g** as colorless oil (36 mg, 0.12 mmol, 63% yield). (new compound).  $^1\text{H}$  NMR (400 MHz,  $\text{CDCl}_3$ ):  $\delta$  7.66-7.63 (m, 2H), 7.47-7.40 (m, 3H), 5.47 (t,  $J = 2.4$  Hz, 1H), 5.42 (t,  $J = 2.4$  Hz, 1H), 4.29-4.17 (m, 2H), 3.27 (dt,  $J = 16.8$ , 2.4 Hz, 1H), 2.75 (dt,  $J = 16.8$ , 2.4 Hz, 1H), 1.99-1.93 (m, 1H), 1.88-1.79 (m, 2H), 1.30 (t,  $J = 6.8$  Hz, 3H), 0.96 (d,  $J = 6.0$  Hz, 6H);  $^{13}\text{C}$  NMR (125 MHz,  $\text{CDCl}_3$ ):  $\delta$  174.0, 172.3, 148.1, 133.4, 130.0, 128.8, 128.3, 112.6, 79.3, 61.2, 47.7, 40.6, 25.1, 24.1, 23.8, 14.2; HRMS: calcd for  $\text{C}_{18}\text{H}_{24}\text{NO}_2$  ( $\text{M}^+ + \text{H}$ ) 286.1802; found 286.1804.

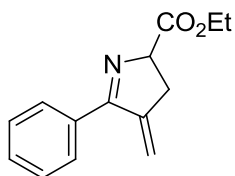

ethyl 4-methylene-5-phenyl-3,4-dihydro-2*H*-pyrrole-2-carboxylate (**4h**)

Prepared from ethyl 2-isocyanopent-4-enoate (30 mg, 0.2 mmol, 1.0 equiv) and iodobenzene (61 mg, 0.3 mmol, 1.5 equiv) according to the general procedure. Column chromatography purification (EtOAc : petroleum ether 30 : 1) furnished the product **4h** as yellow oil (33 mg, 0.14 mmol, 72% yield). (new compound).  $^1\text{H}$  NMR (400 MHz,  $\text{CDCl}_3$ ): 7.67-7.65 (m, 2H), 7.46-7.40 (m, 3H), 5.51-5.47 (m, 2H), 4.87 (t,  $J = 6.4$  Hz, 1H), 4.30-4.22 (m, 2H), 3.06-3.03 (m, 2H), 1.32 (t,  $J = 6.8$  Hz, 3H);  $^{13}\text{C}$  NMR (125 MHz,  $\text{CDCl}_3$ ):  $\delta$  174.8, 172.0, 147.8, 133.1, 130.2, 128.7, 128.4, 112.9, 71.0, 61.4, 34.3, 14.2; HRMS: calcd for  $\text{C}_{14}\text{H}_{16}\text{NO}_2$  ( $\text{M}^+ + \text{H}$ ) 230.1176; found 230.1174.

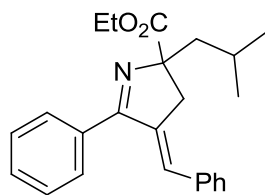

(*E*)-ethyl 4-benzylidene-2-isobutyl-5-phenyl-3,4-dihydro-2*H*-pyrrole-2-carboxylate  
(**4i**)

Prepared from (*E*)-ethyl 2-isobutyl-2-isocyano-5-phenylpent-4-enoate (57 mg, 0.2 mmol, 1.0 equiv) and iodobenzene (61 mg, 0.3 mmol, 1.5 equiv) according to the general procedure. Column chromatography purification (EtOAc : petroleum ether 30 : 1) furnished the product **4i** as yellow oil (70 mg, 0.19 mmol, 97% yield). (new compound).  $^1\text{H}$  NMR (400 MHz,  $\text{CDCl}_3$ ): 7.66-7.65 (m, 2H), 7.48-7.37 (m, 7H), 7.32-7.25 (m, 1H), 6.80 (t,  $J = 2.4$  Hz, 1H), 4.31-4.18 (m, 2H), 3.55 (dd,  $J = 17.2, 2.8$  Hz, 1H), 3.02 (dd,  $J = 17.2, 2.8$  Hz, 1H), 1.97-1.93 (m, 2H), 1.91-1.82 (m, 1H), 1.31 (t,  $J = 6.8$  Hz, 3H), 0.98-0.95 (m, 6H);  $^{13}\text{C}$  NMR (125 MHz,  $\text{CDCl}_3$ ):  $\delta$  174.5, 174.5, 140.9, 136.8, 134.2, 130.1, 129.7, 129.4, 129.3, 129.0, 128.7, 128.6, 81.2, 61.7, 48.4, 27.4, 25.4, 24.4, 24.2, 14.5; HRMS: calcd for  $\text{C}_{24}\text{H}_{28}\text{NO}_2$  ( $\text{M}^+ + \text{H}$ ) 362.2115; found 362.2118.

## V. References

- (1) Casabona, D.; Jiménez, A.; Cativiela C. *Tetrahedron*. **2007**, *63*, 5056.
- (2) Gulevich, A. V.; Zhdanko, A. G.; Orru, R. V. A.; Nenajdenko, V. G. *Chem. Rev.* **2010**, *110*, 5235.
- (3) Ito, Y.; Higuchi, N.; Murakami, M. *Tetrahedron Lett.* **1988**, *29*, 5151.
- (4) Banfi, L.; Basso, A.; Guanti, G.; Riva, R. *Tetrahedron Lett.* **2003**, *44*, 7655.

## VI. Copies of $^1\text{H}$ and $^{13}\text{C}$ NMR Spectra

1a

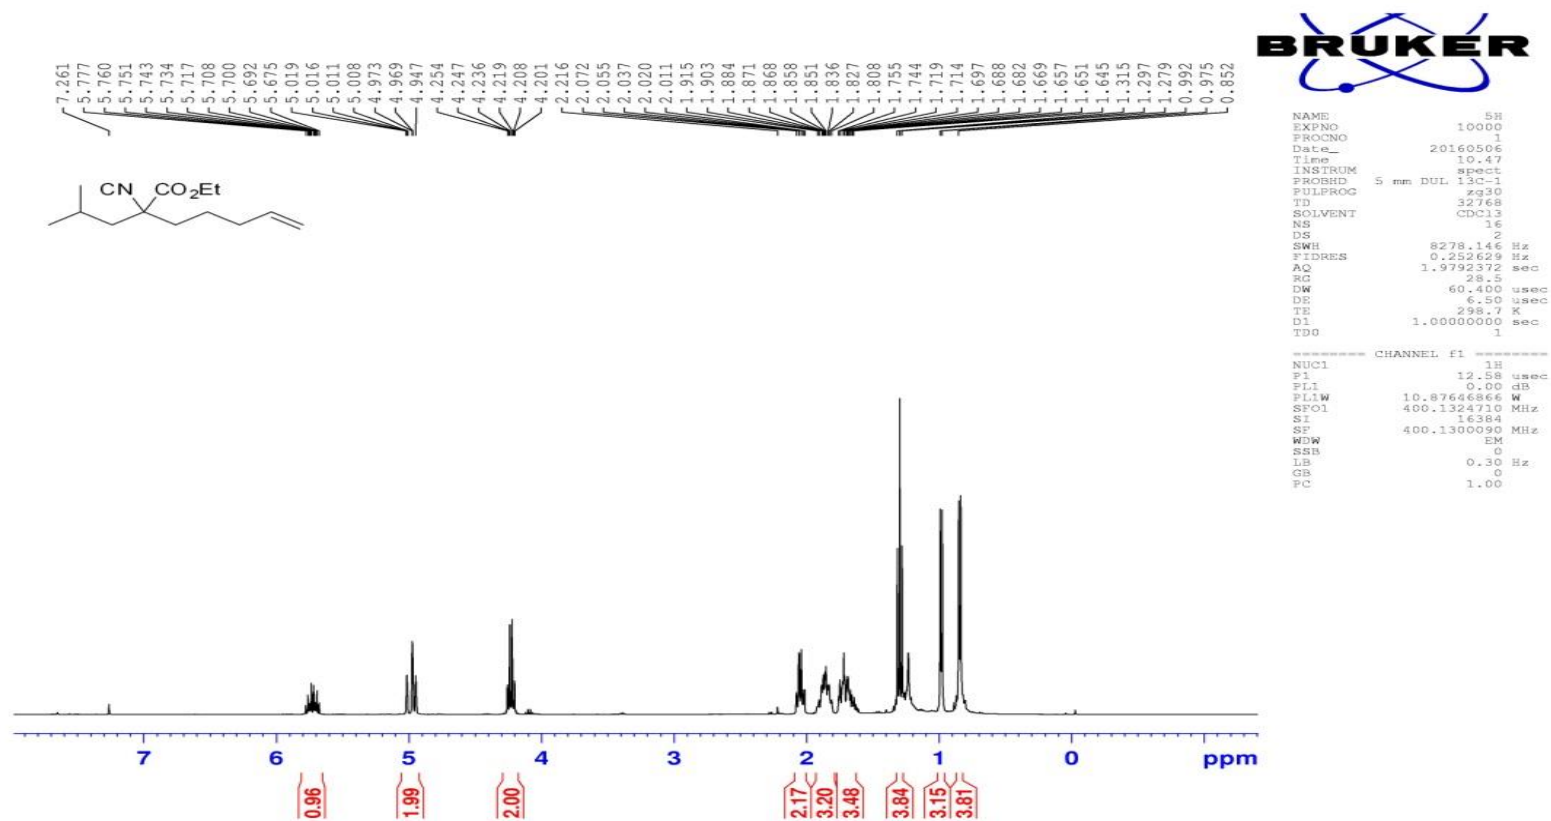

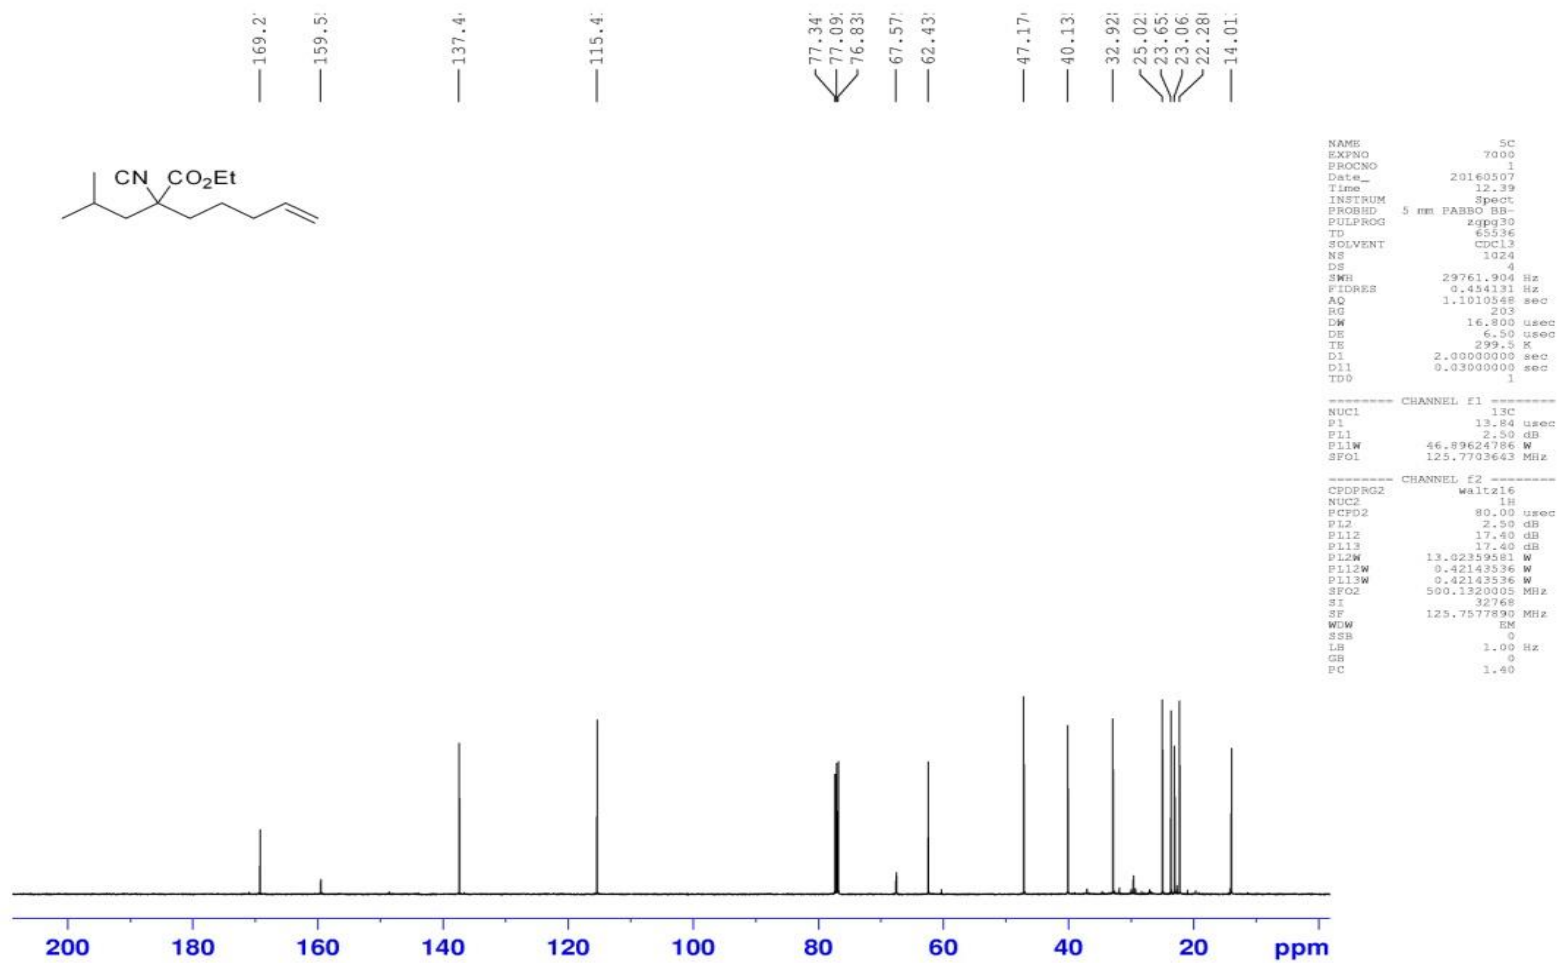

1b

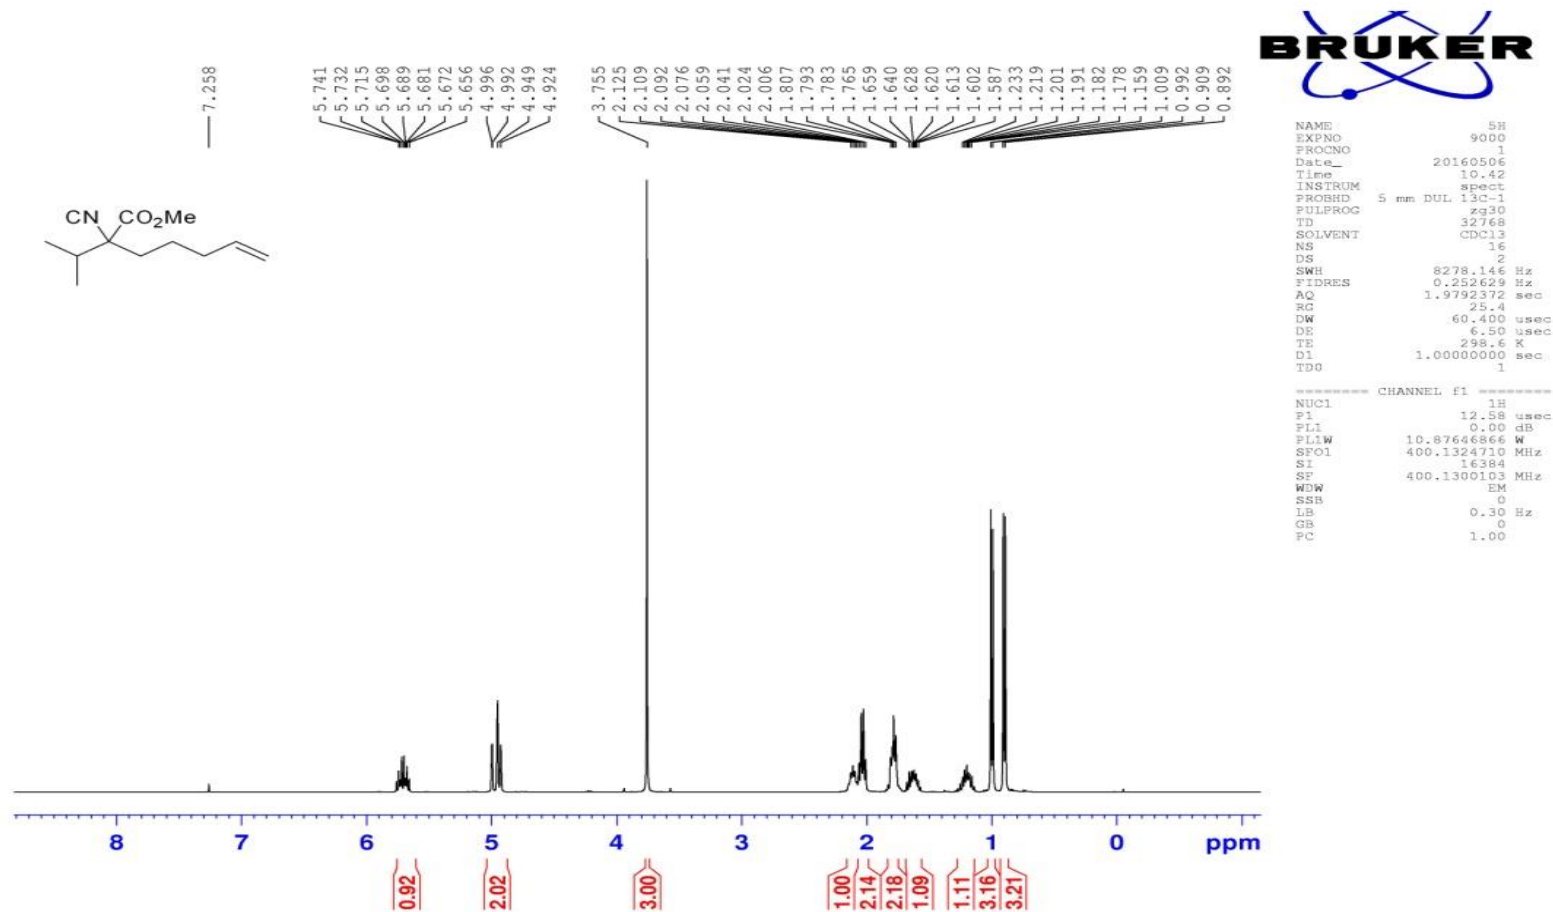

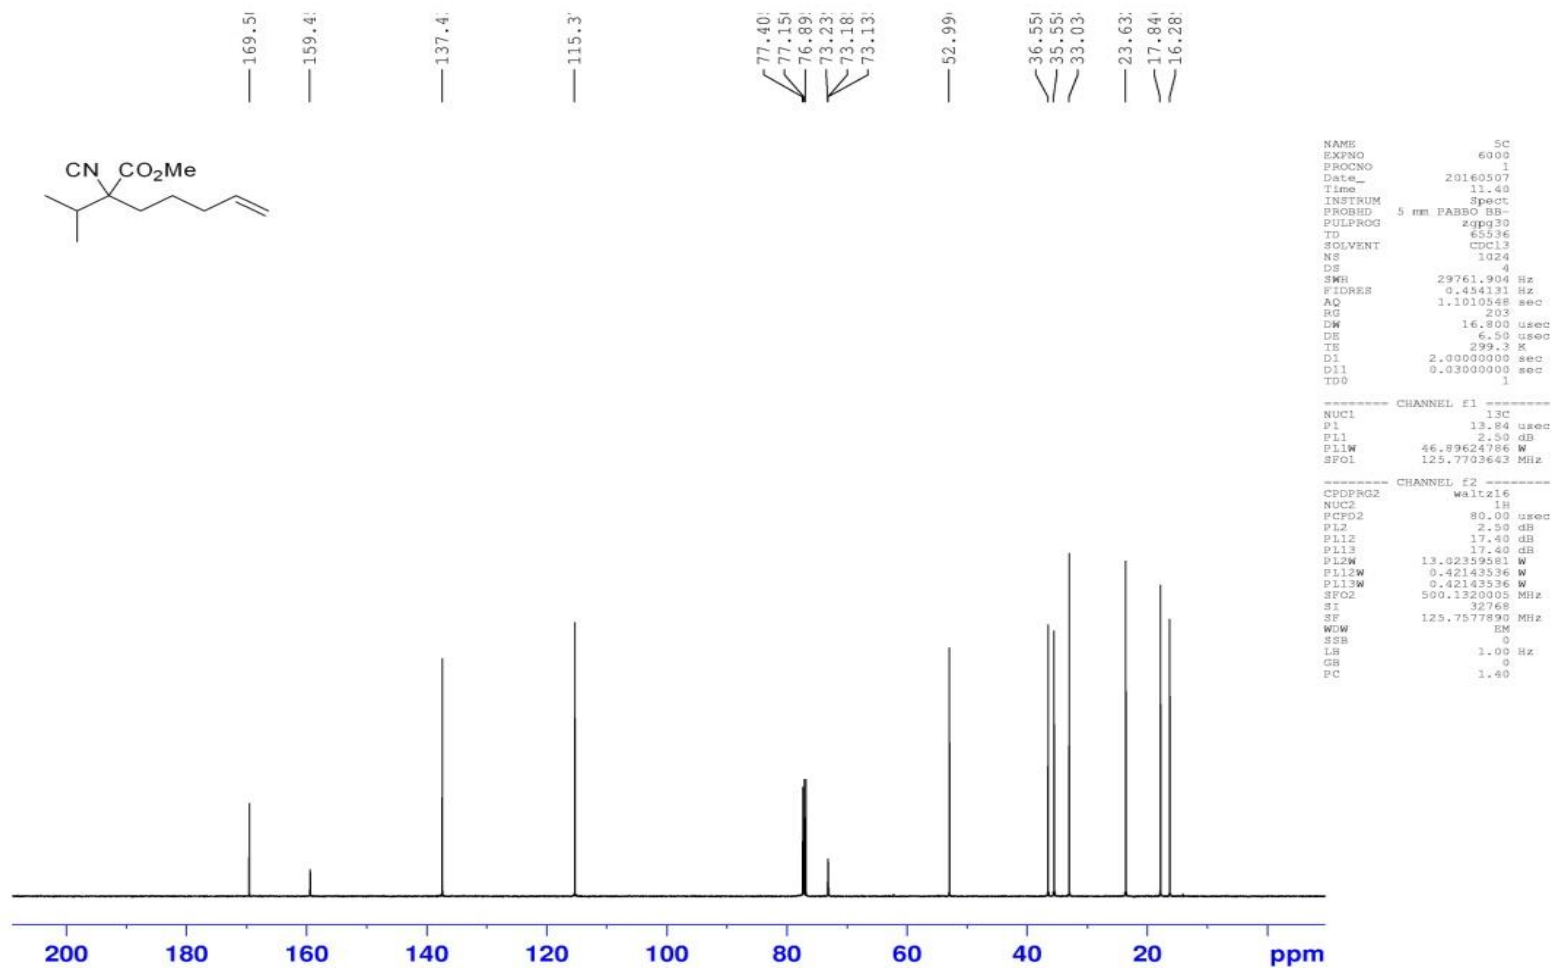



1c

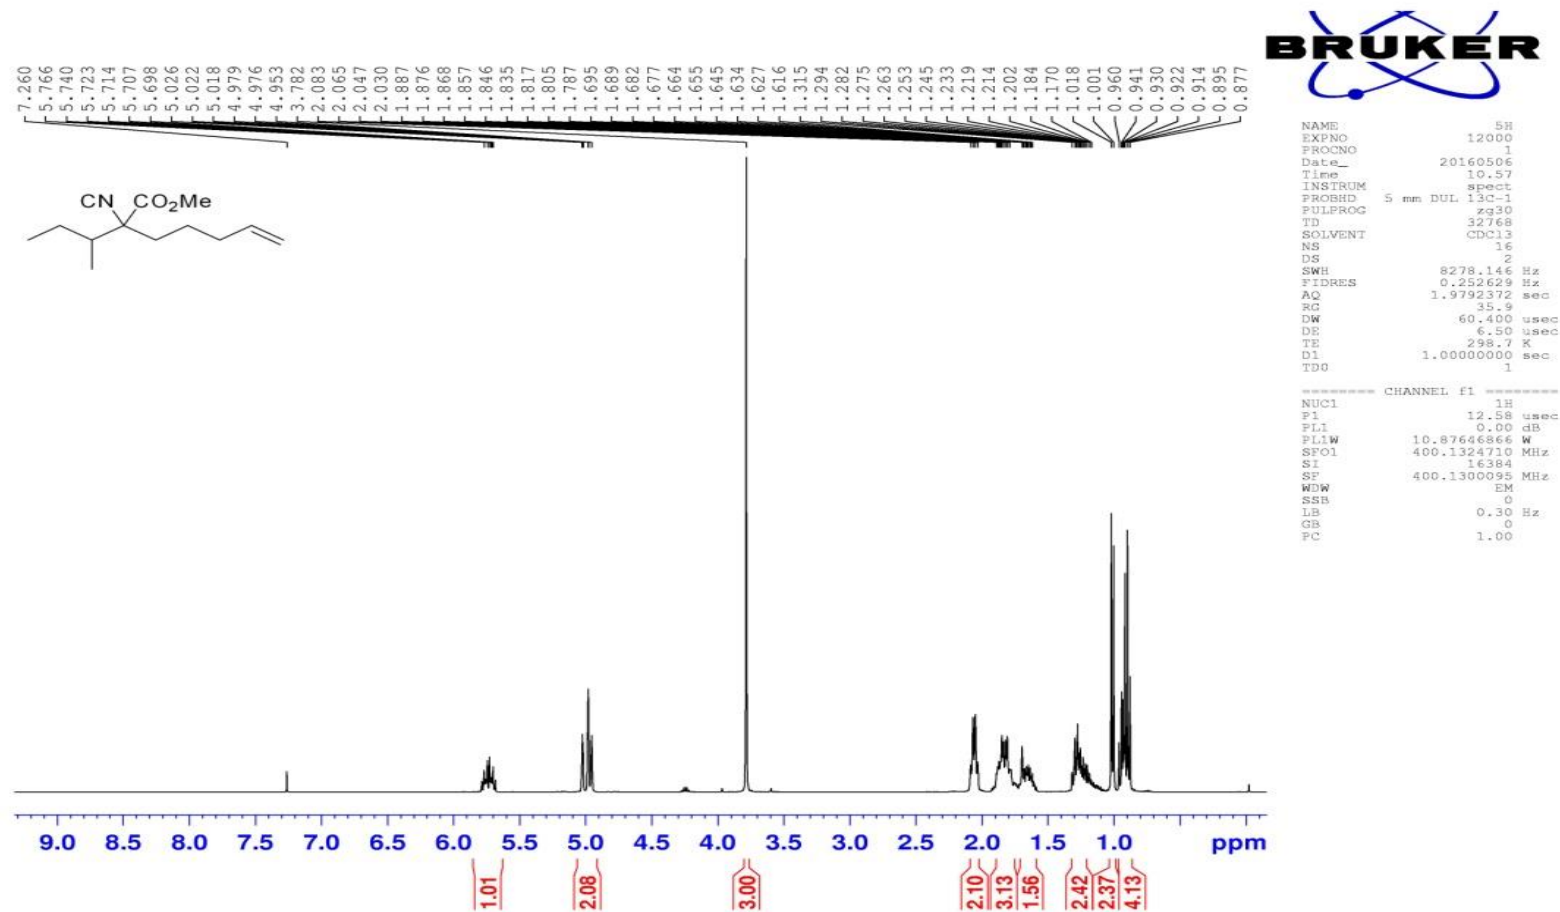

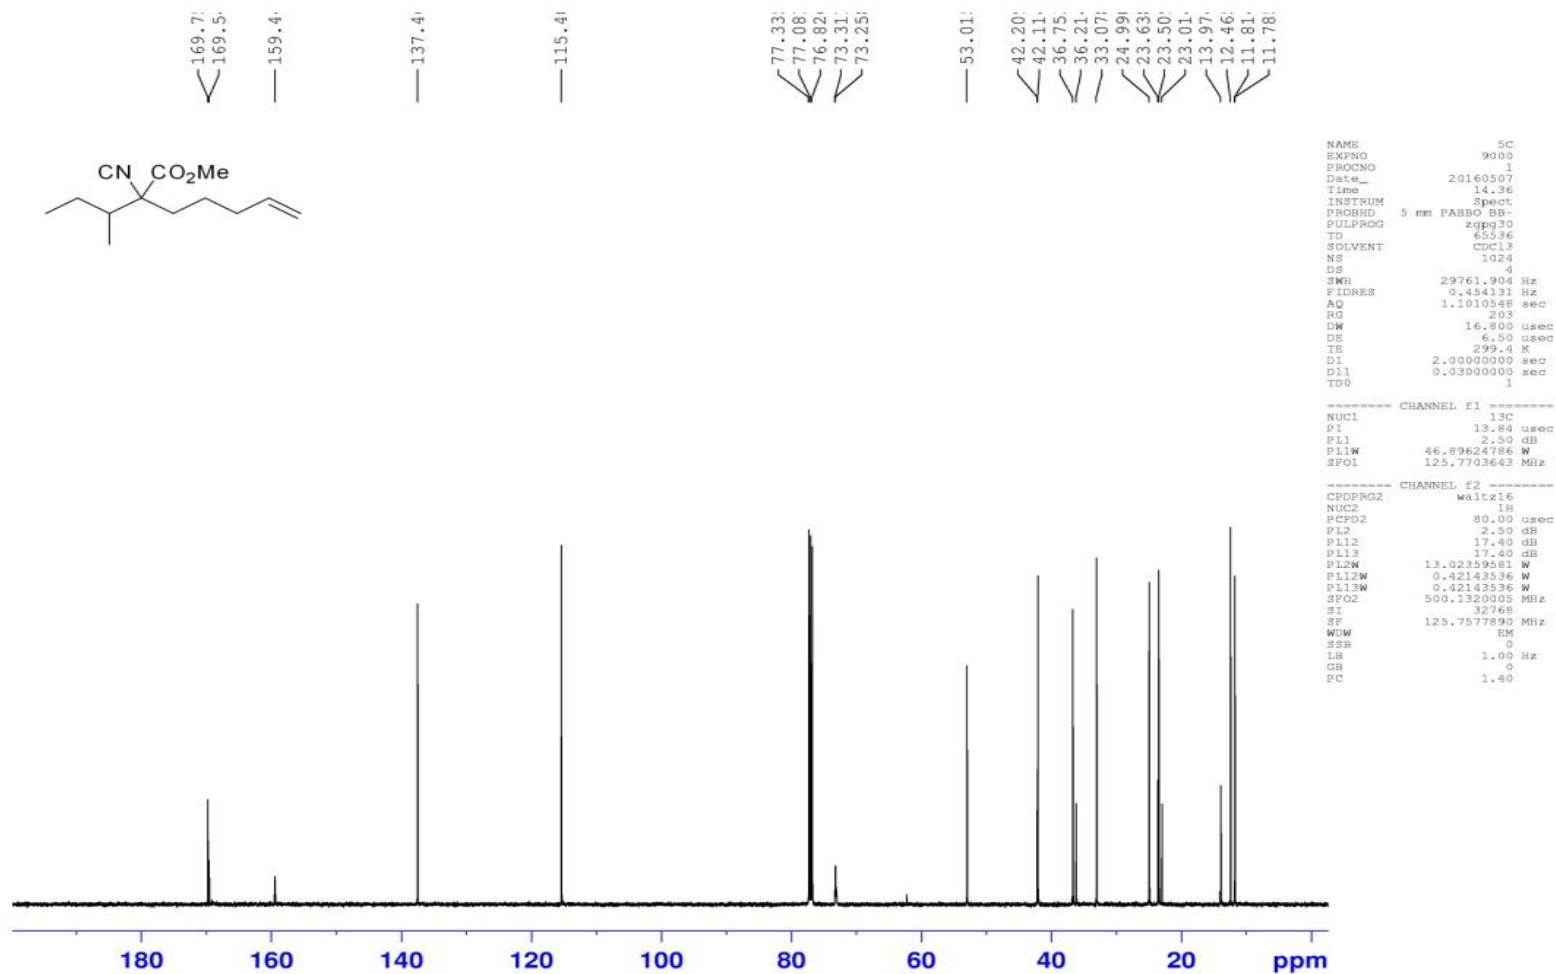

1d

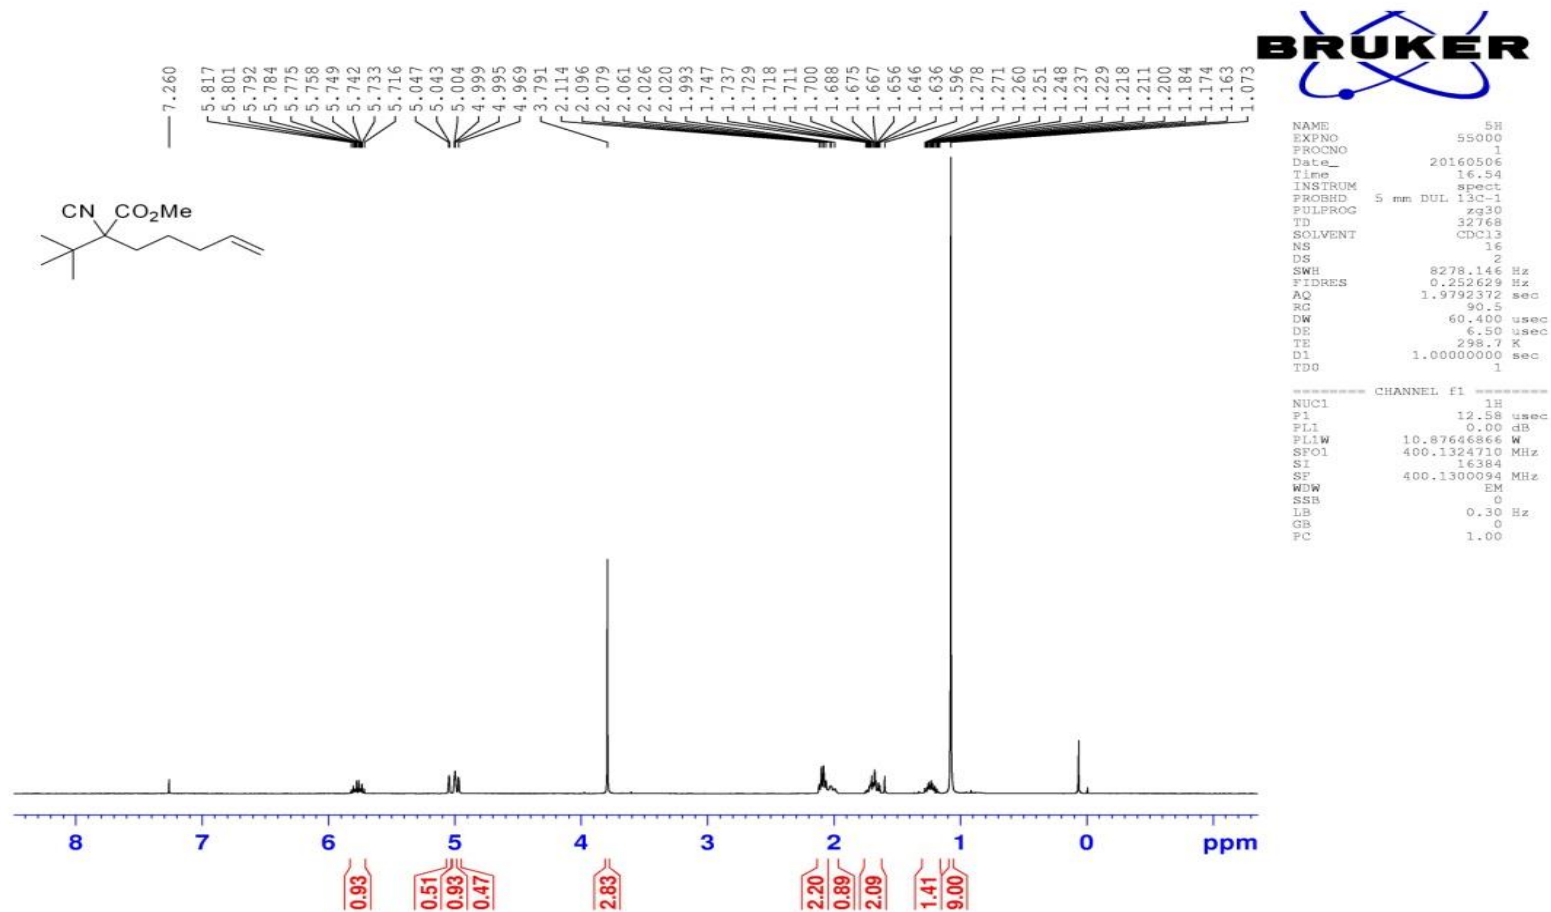

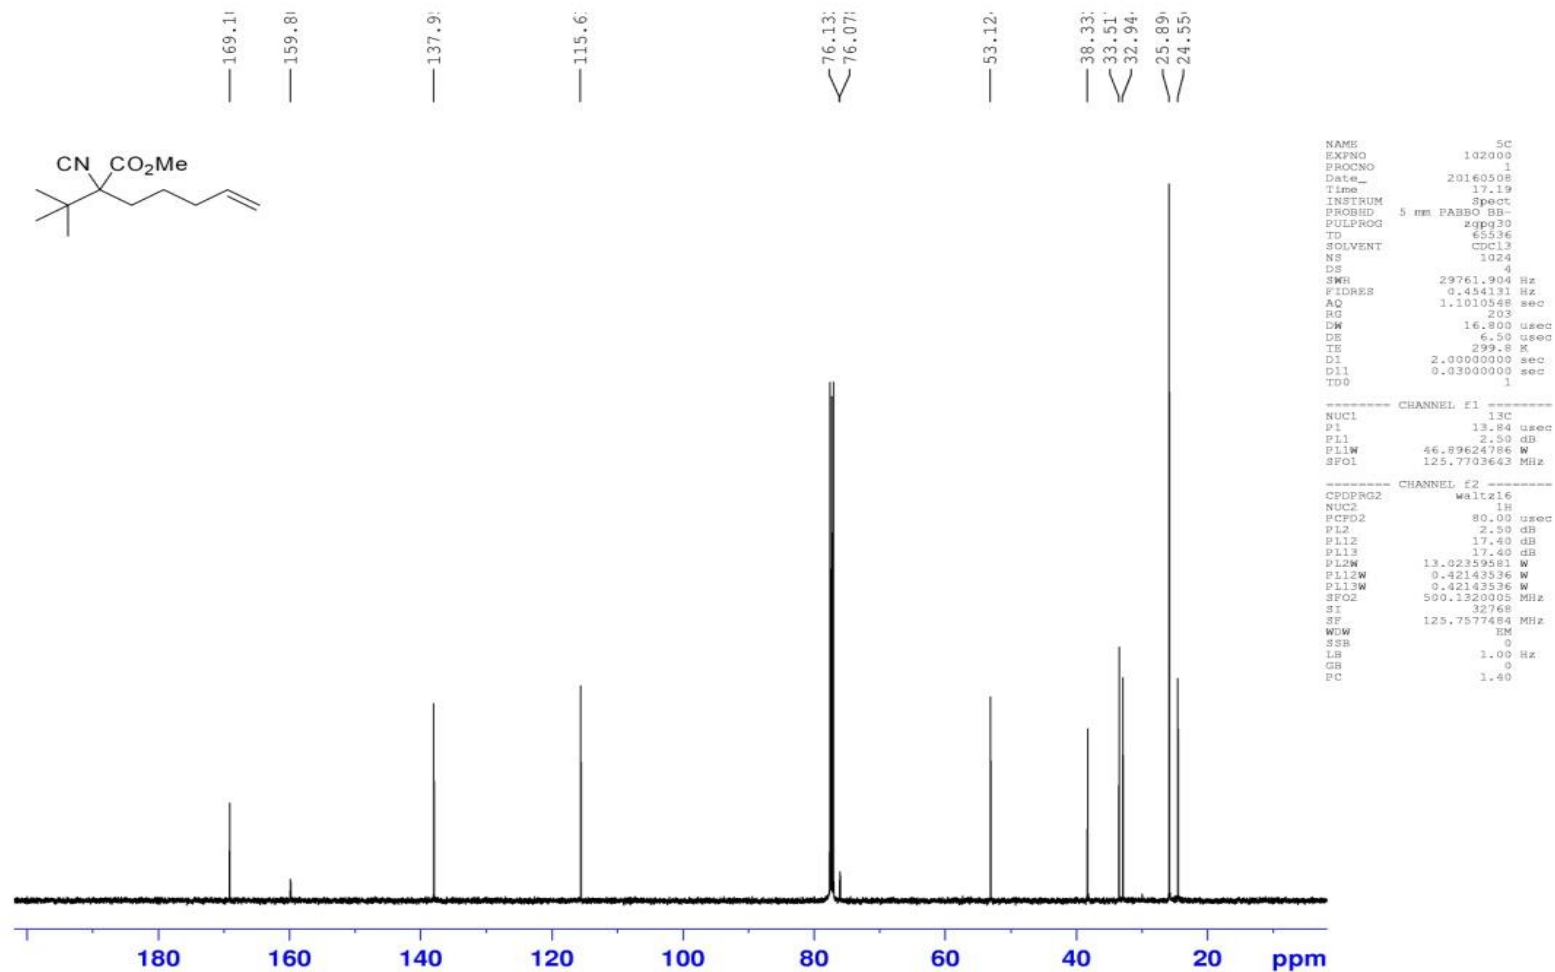

1e

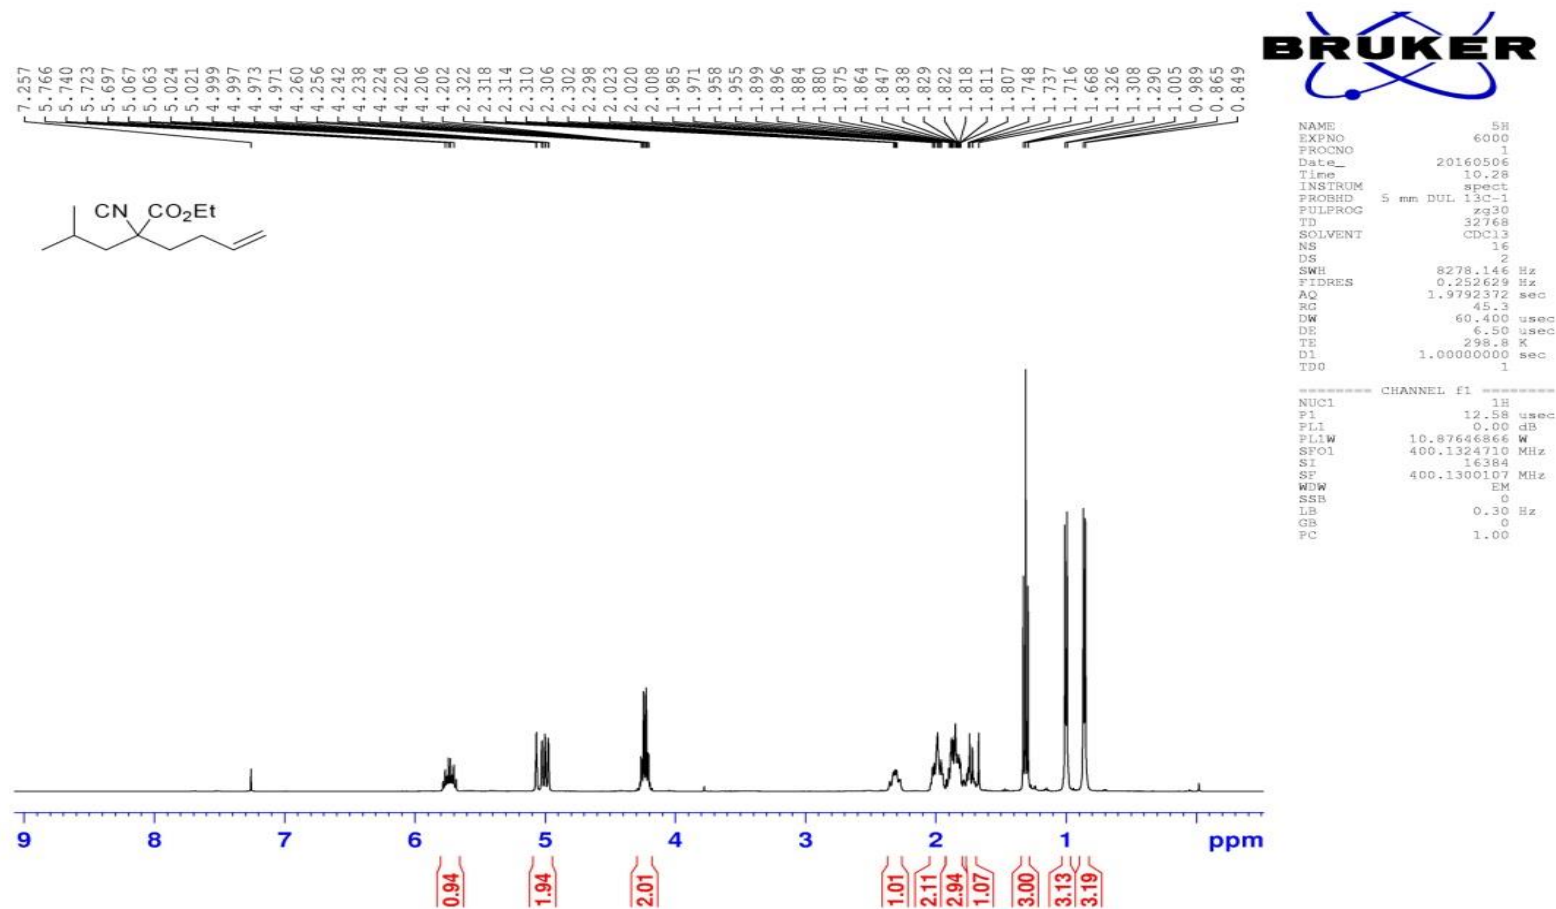

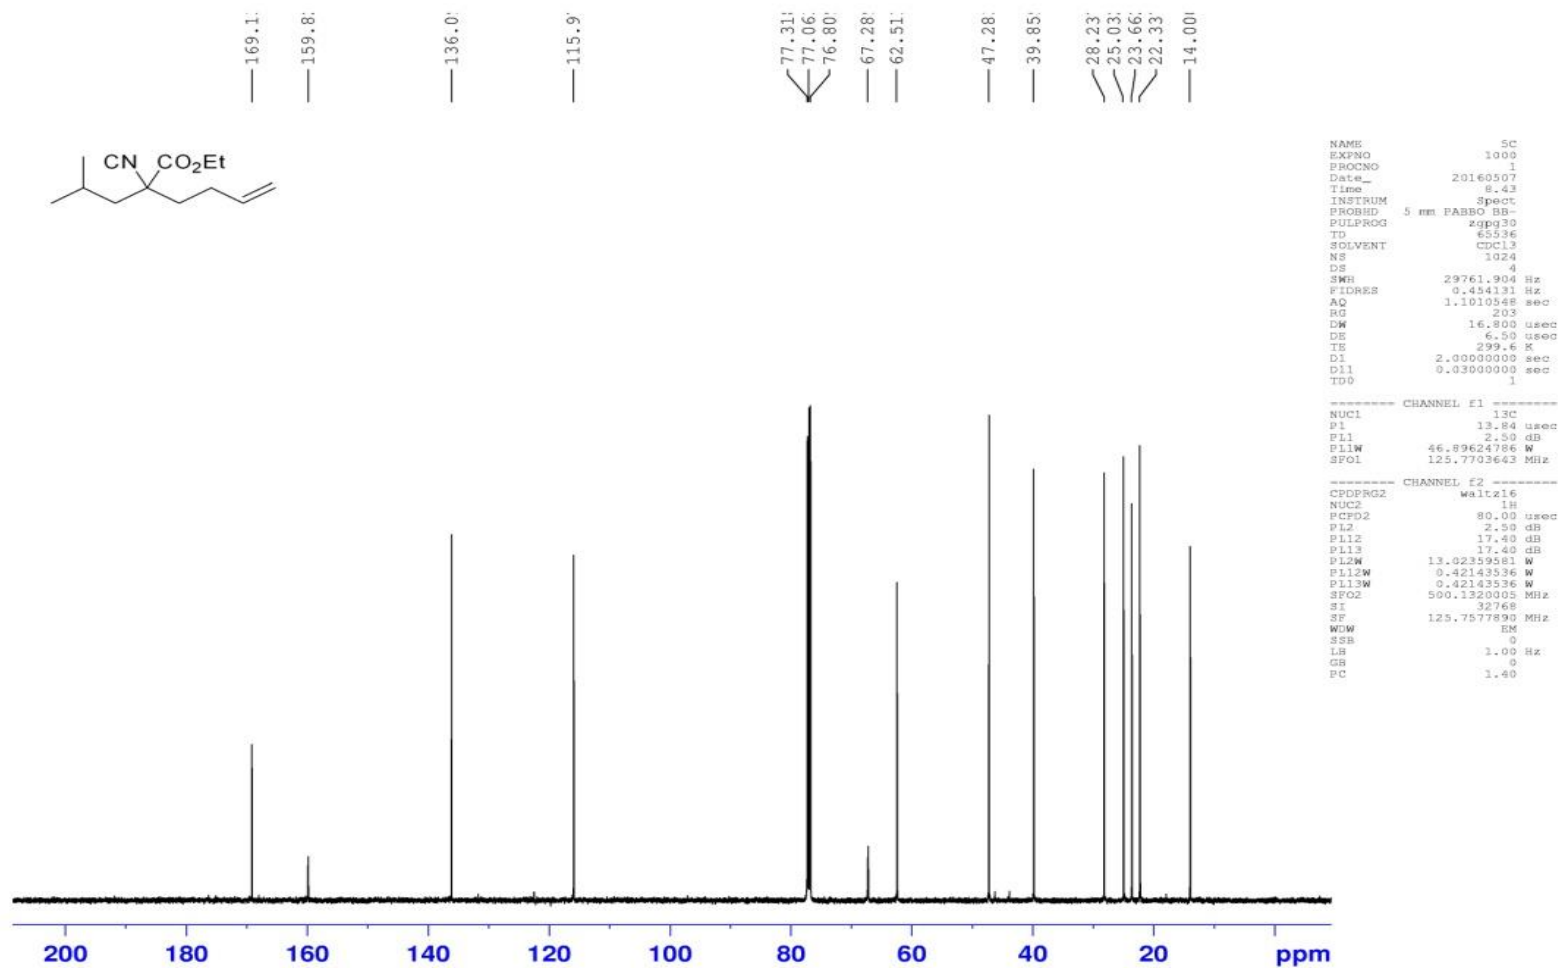

1f

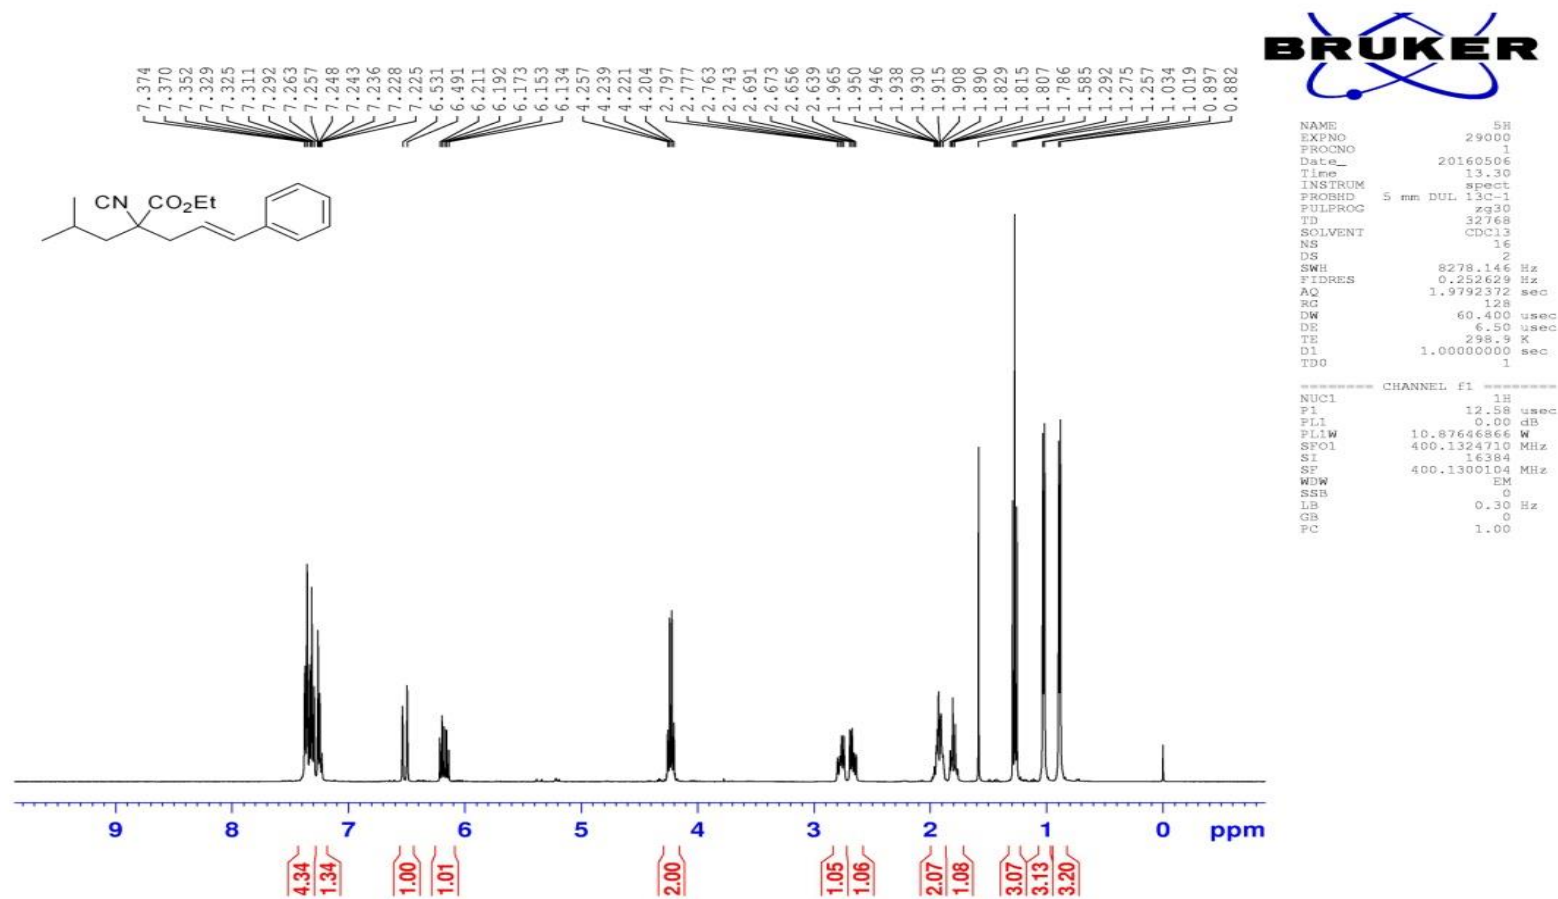

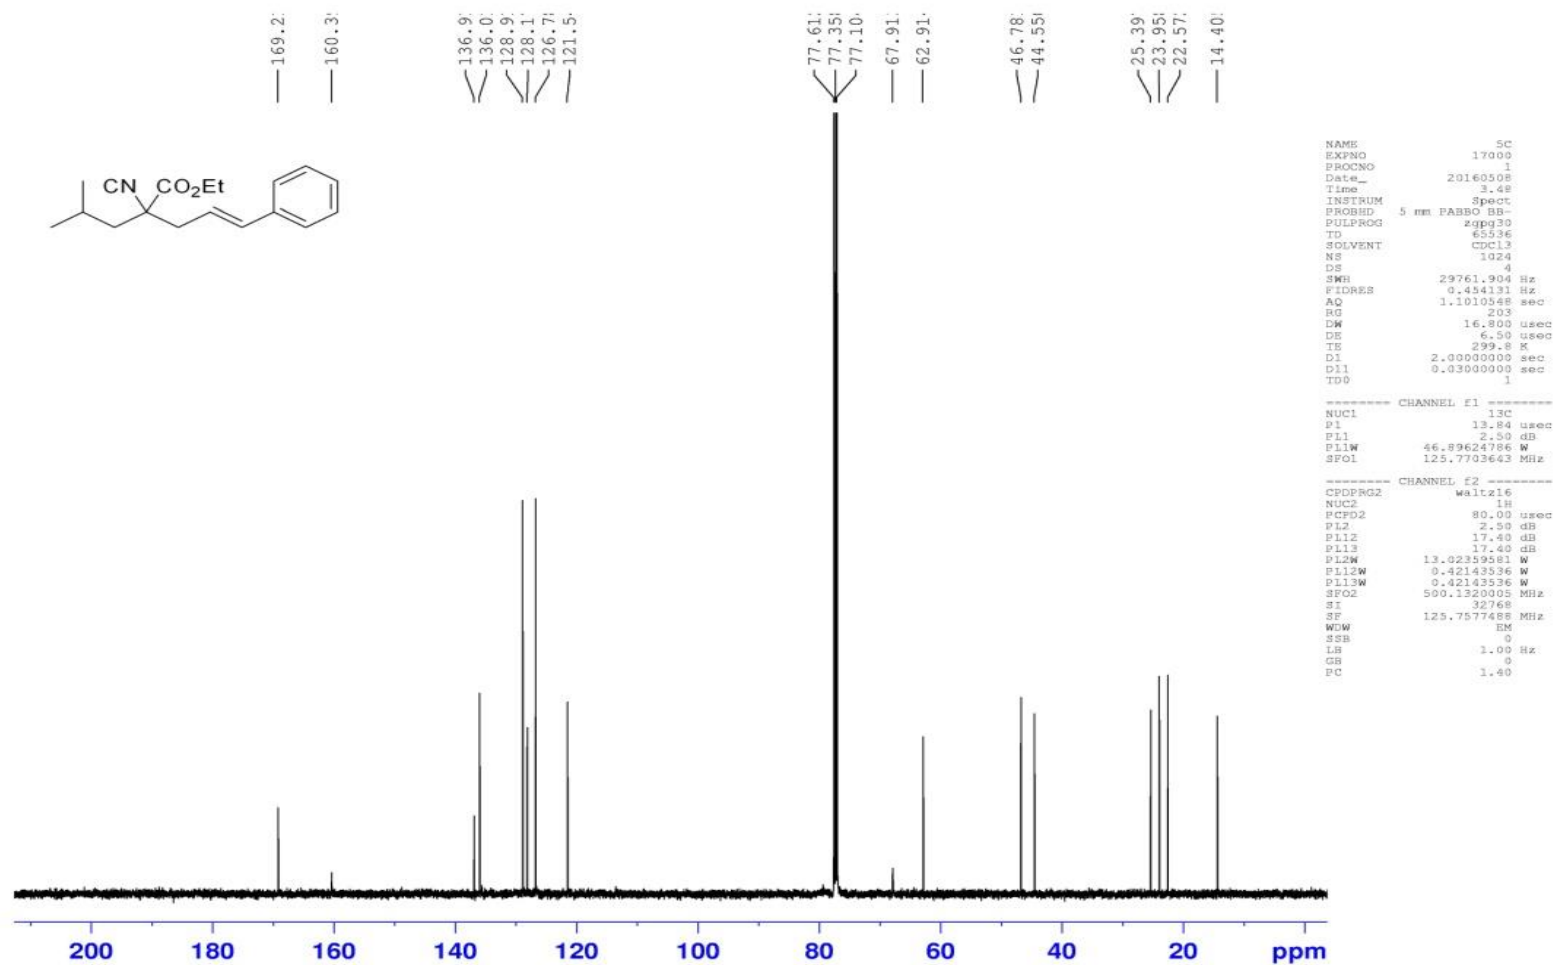



1g

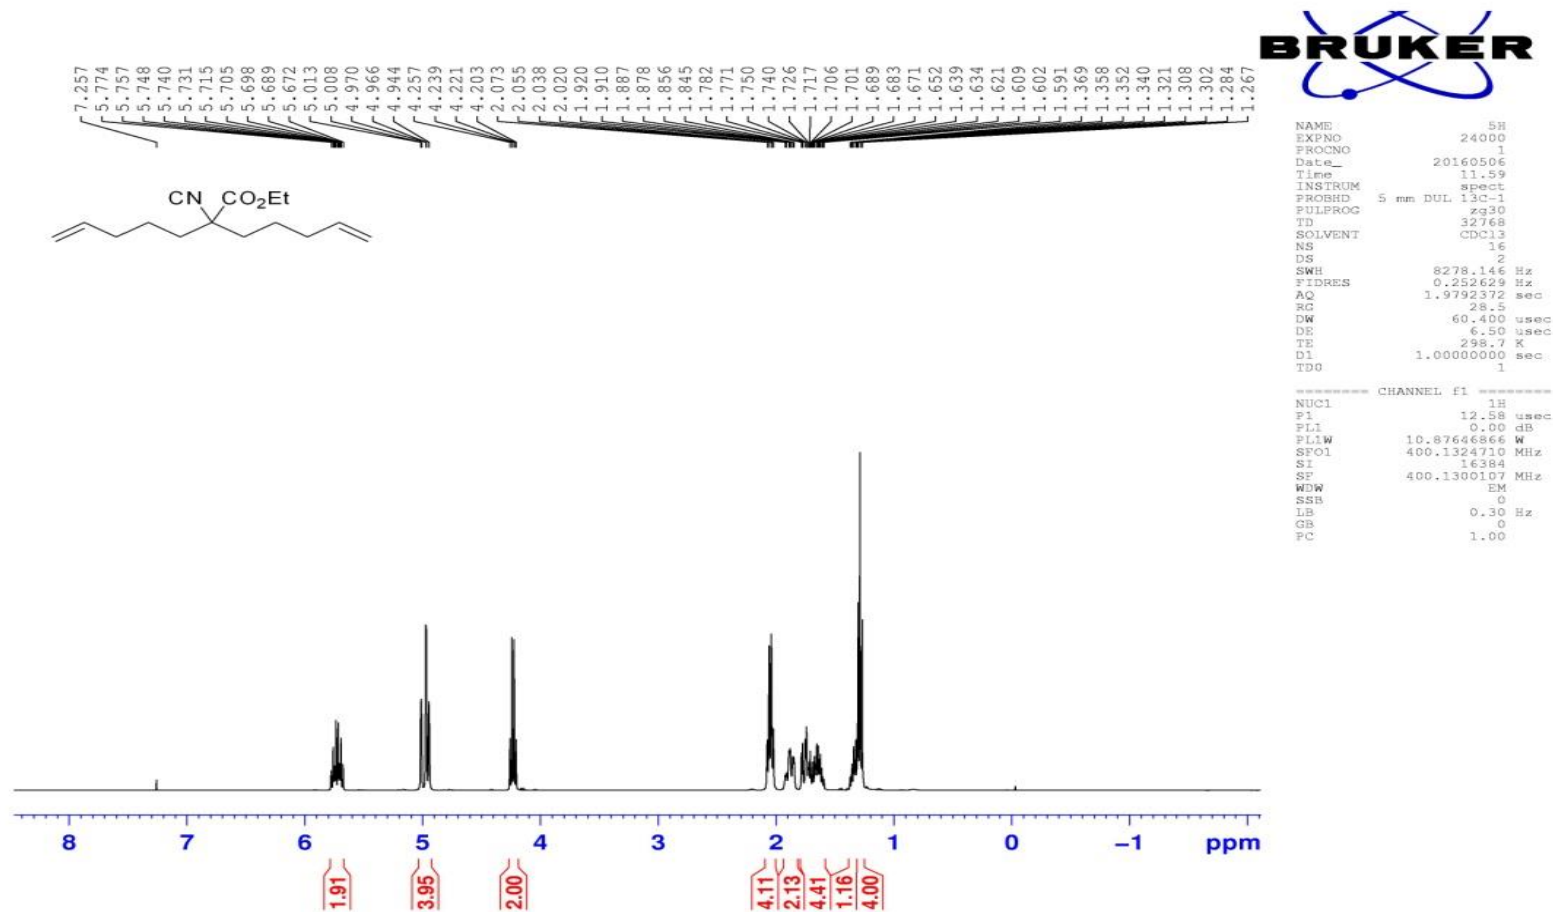

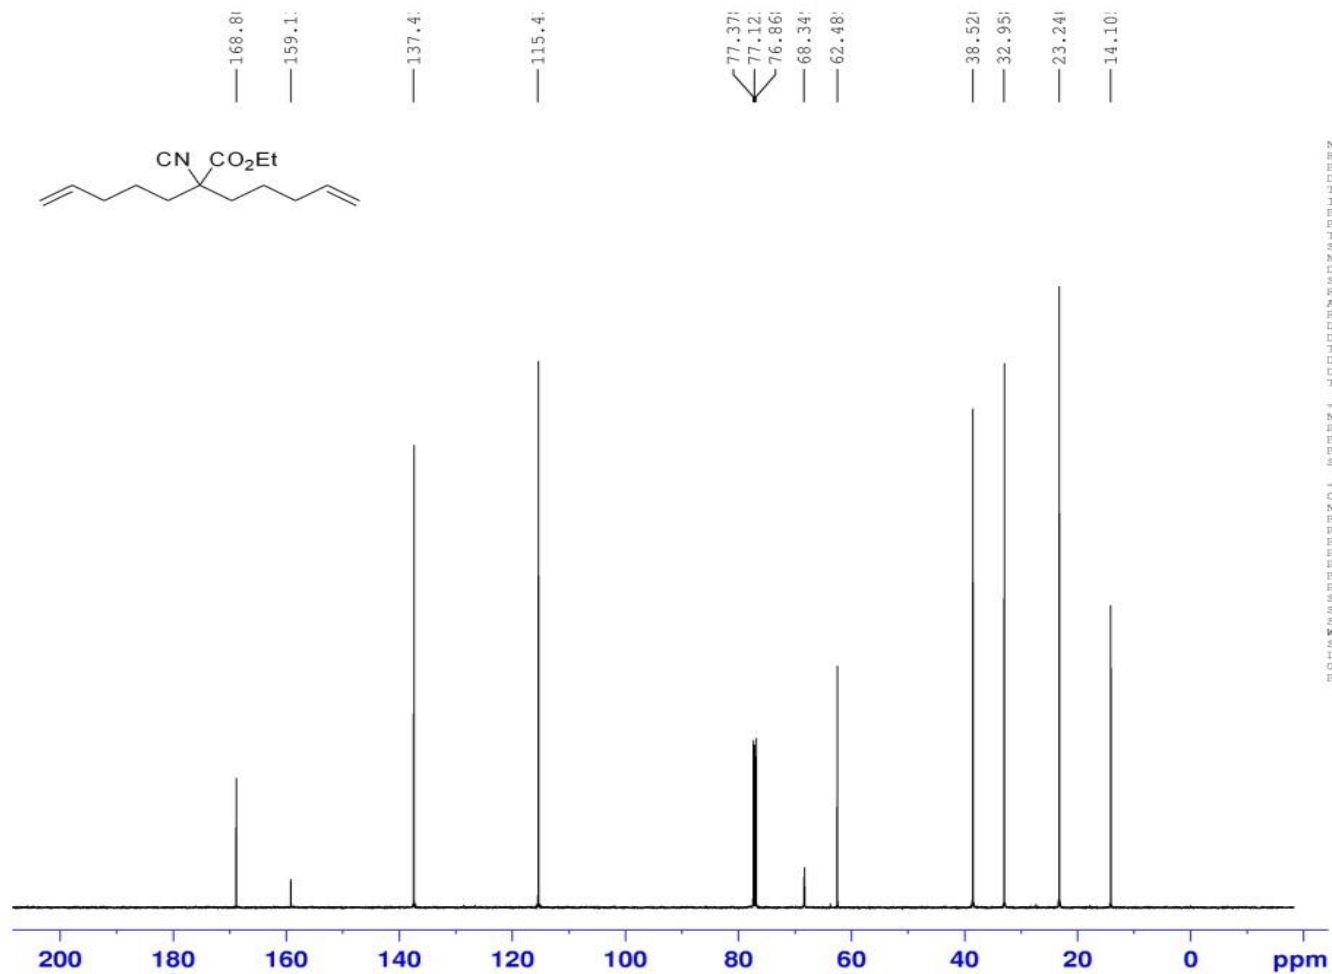

```

NAME          5C
EXPNO         8000
PROCNO        1
Date_         20160507
Time          13.37
INSTRUM       Spect
PROBHD        5 mm PABBO BB-
PULPROG       zgpg30
TD            65536
SOLVENT       CDCl3
NS            1024
DS            4
SWH           29761.904 Hz
FIDRES        0.454131 Hz
AQ            1.1010548 sec
RG            203
DW            16.800 usec
DE            6.50 usec
TE            299.4 K
D1            2.00000000 sec
D11           0.03000000 sec
TD0           1

----- CHANNEL f1 -----
NUC1          13C
P1            13.84 usec
PL1           2.50 dB
PL1W          46.89624786 W
SF01          125.7703643 MHz

----- CHANNEL f2 -----
CPDPRG2       waltz16
NUC2          1H
PCPD2         80.00 usec
PL2           2.50 dB
PL12          17.40 dB
PL13          17.40 dB
PL12W         13.02359581 W
PL12W         0.42143536 W
PL13W         0.42143536 W
SF02          500.1320005 MHz
SI            32768
SF            125.7577890 MHz
WFW          EM
SSB           0
LB            1.00 Hz
GB            0
PC            1.40

```

1h

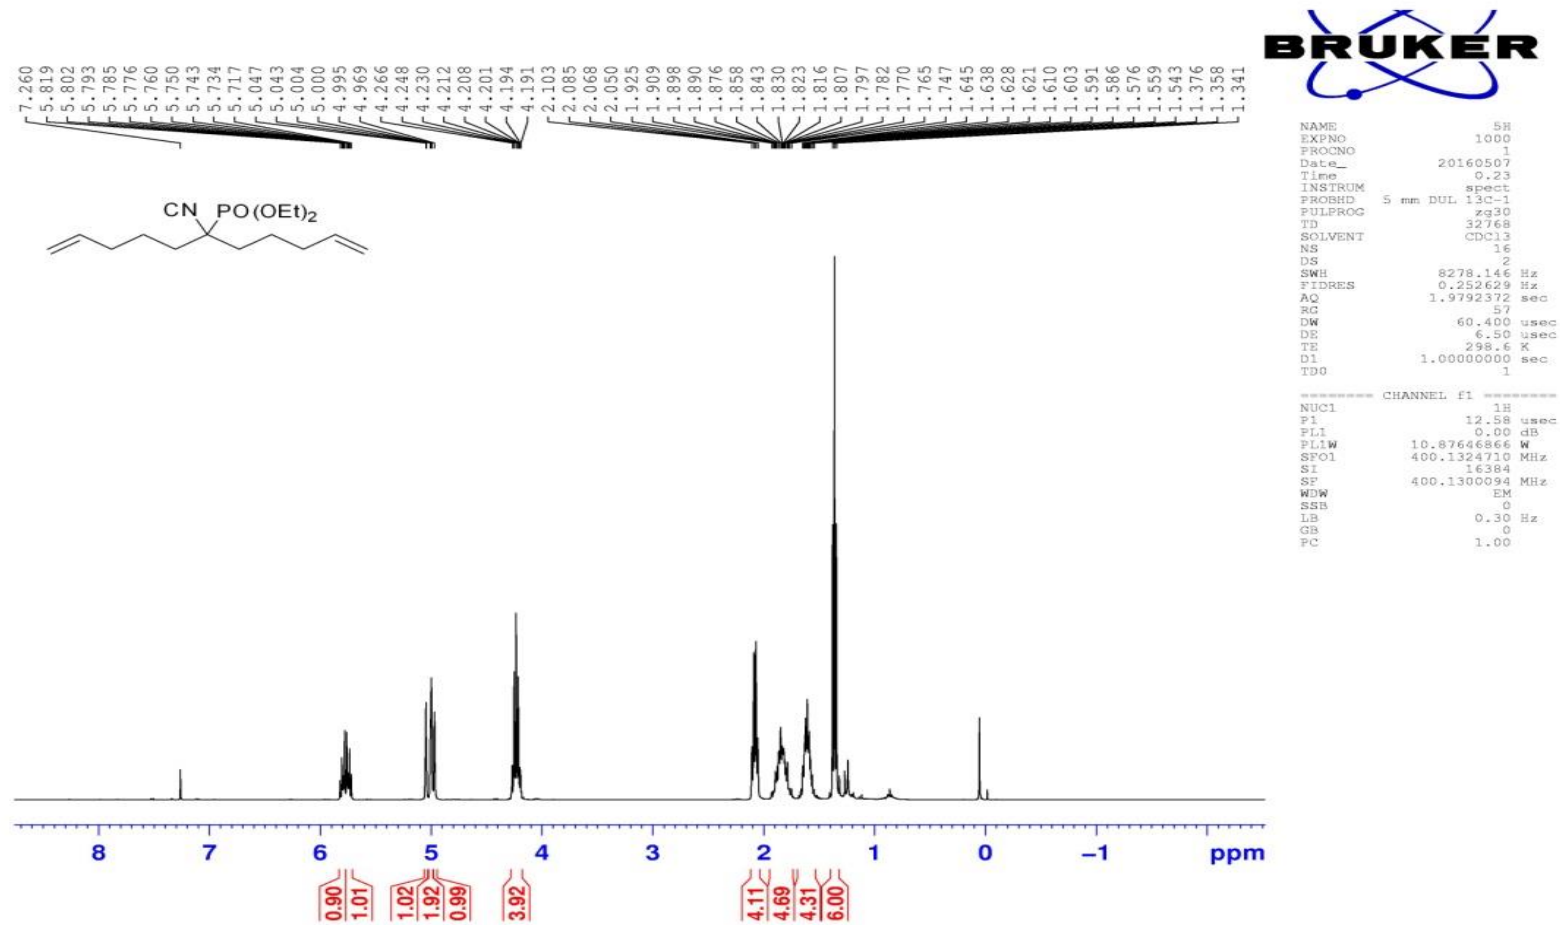

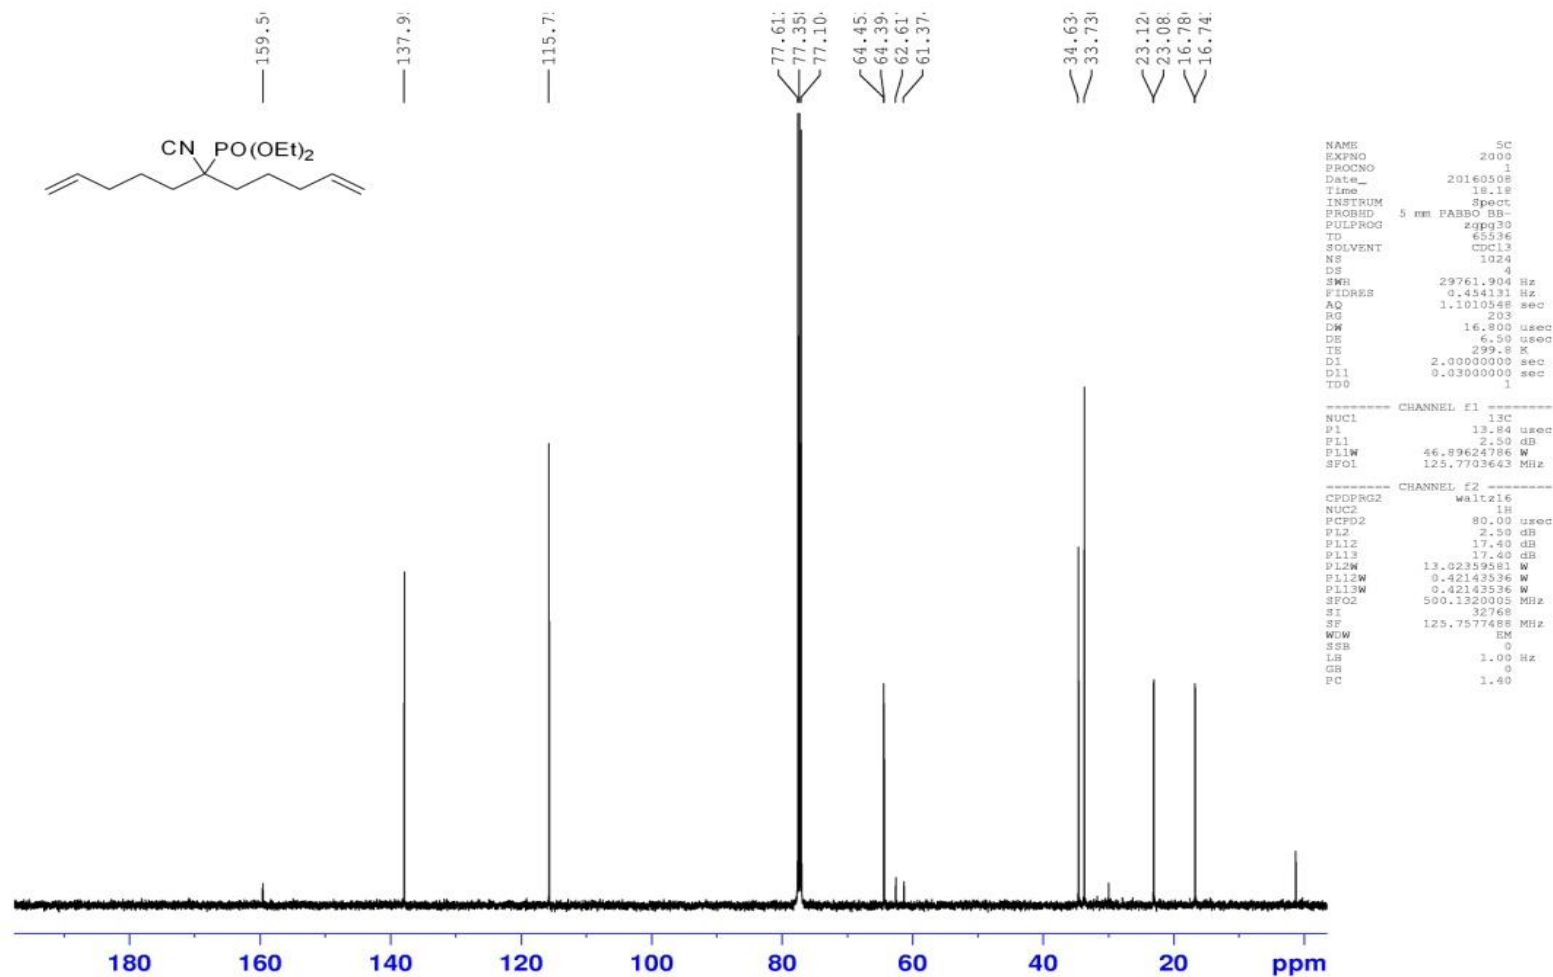

1i

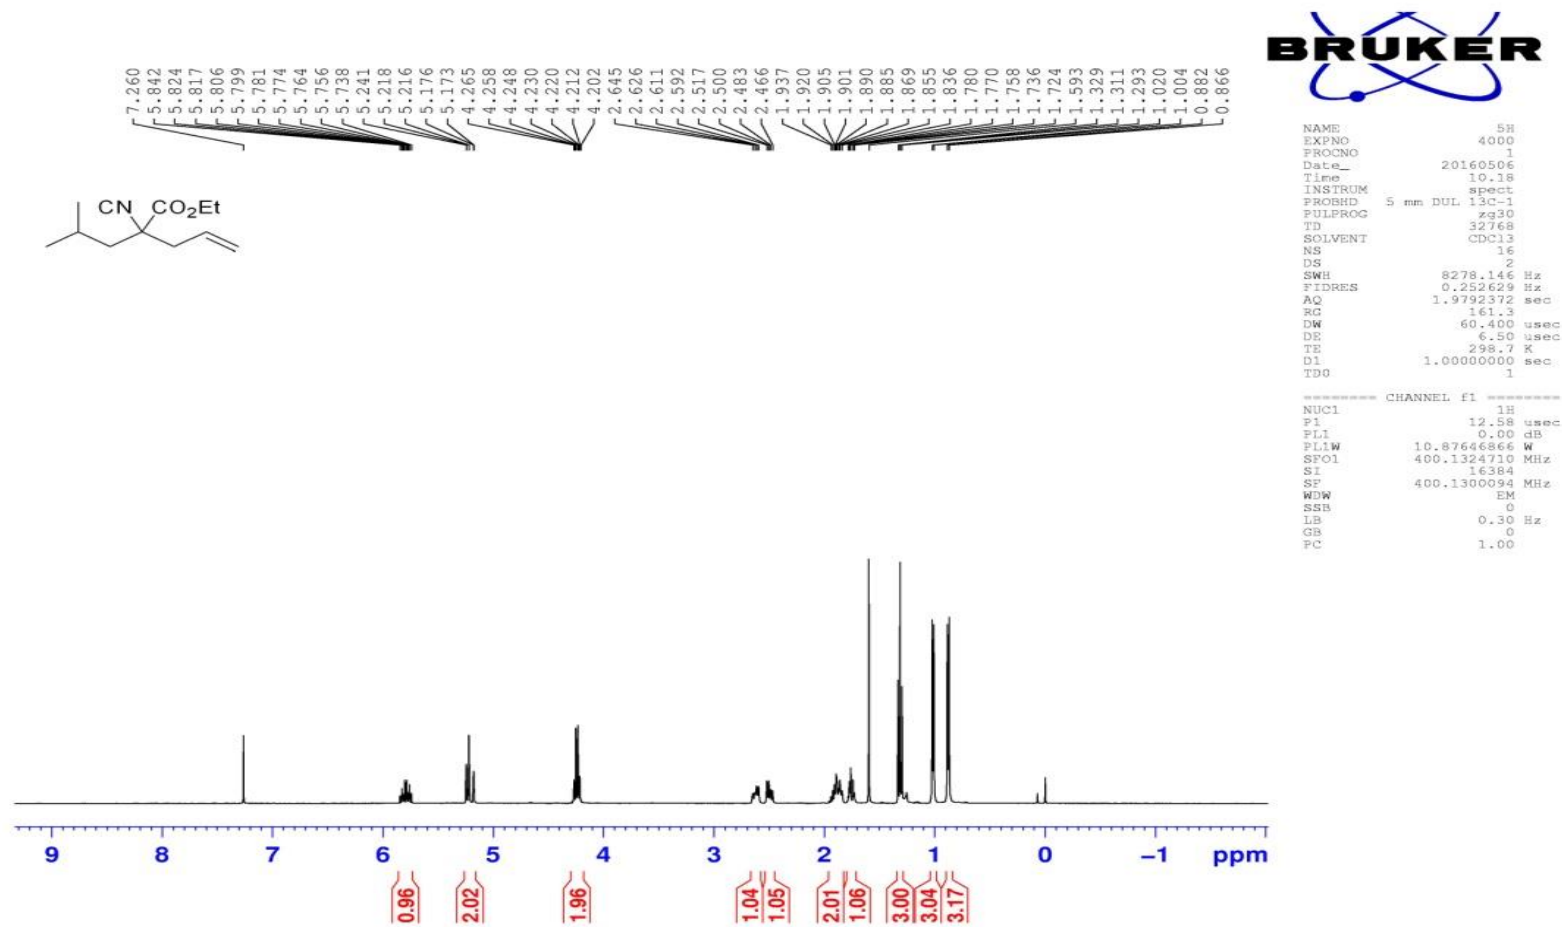

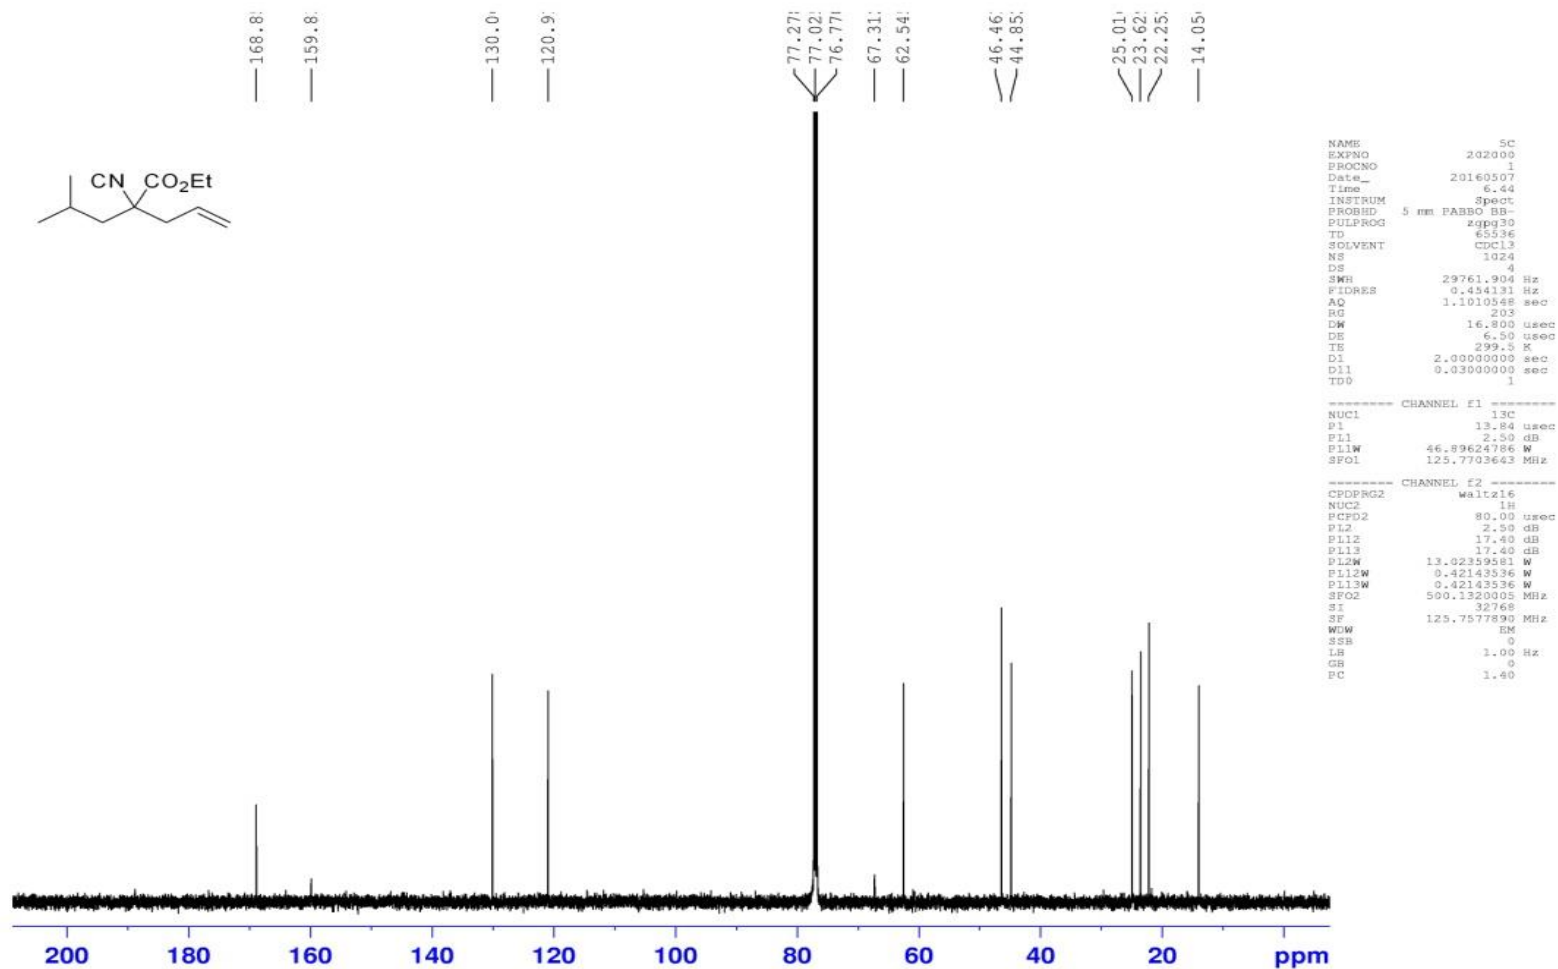

1j

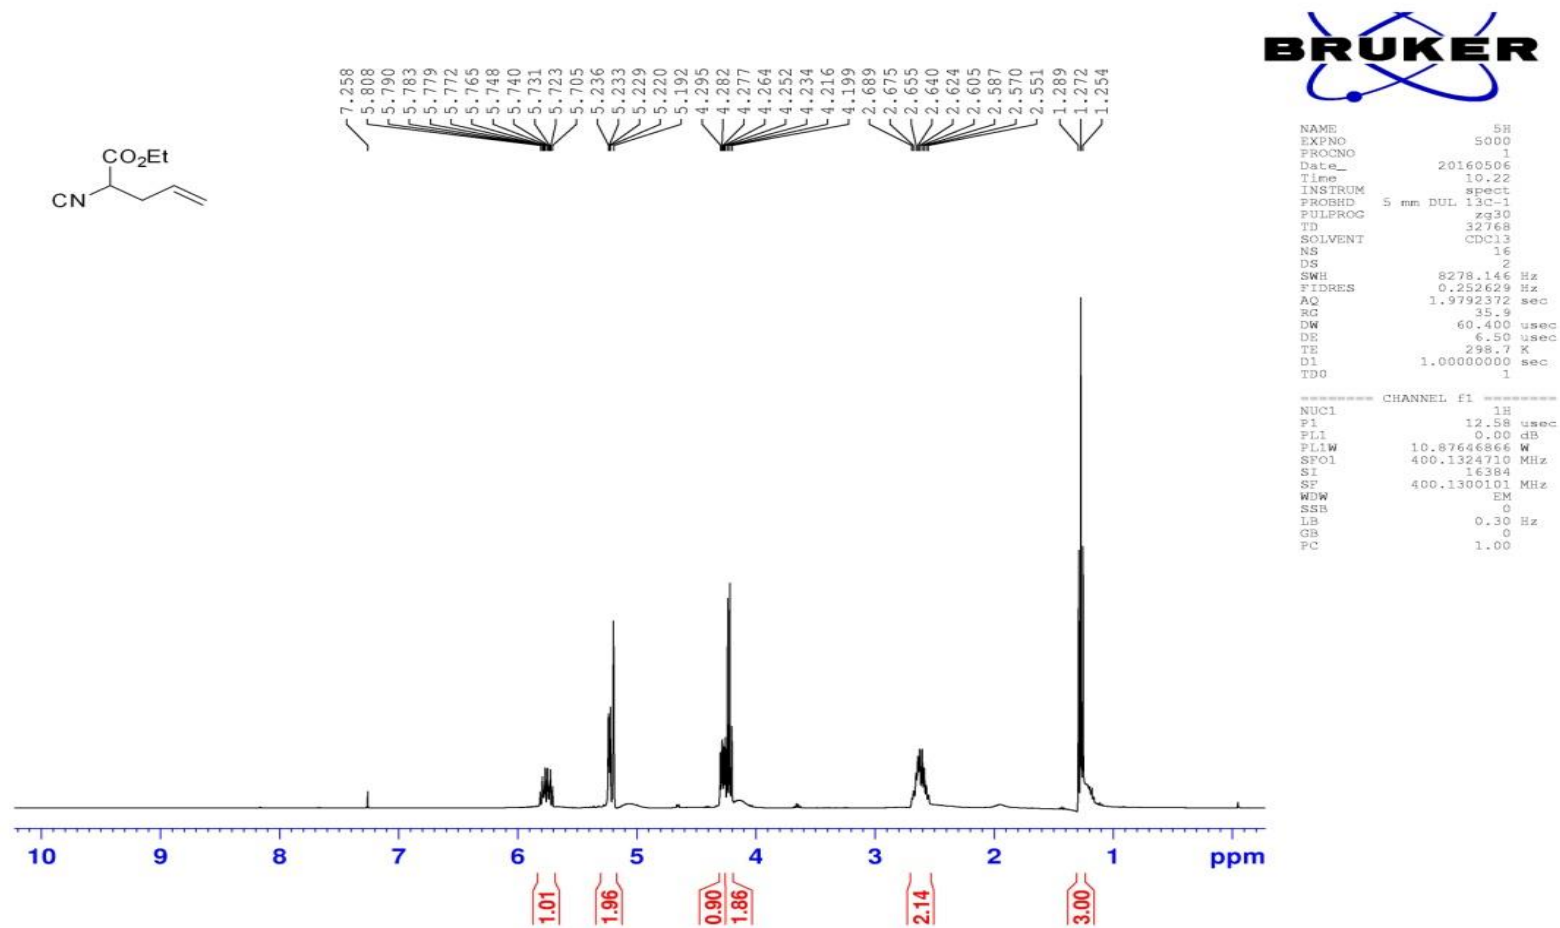

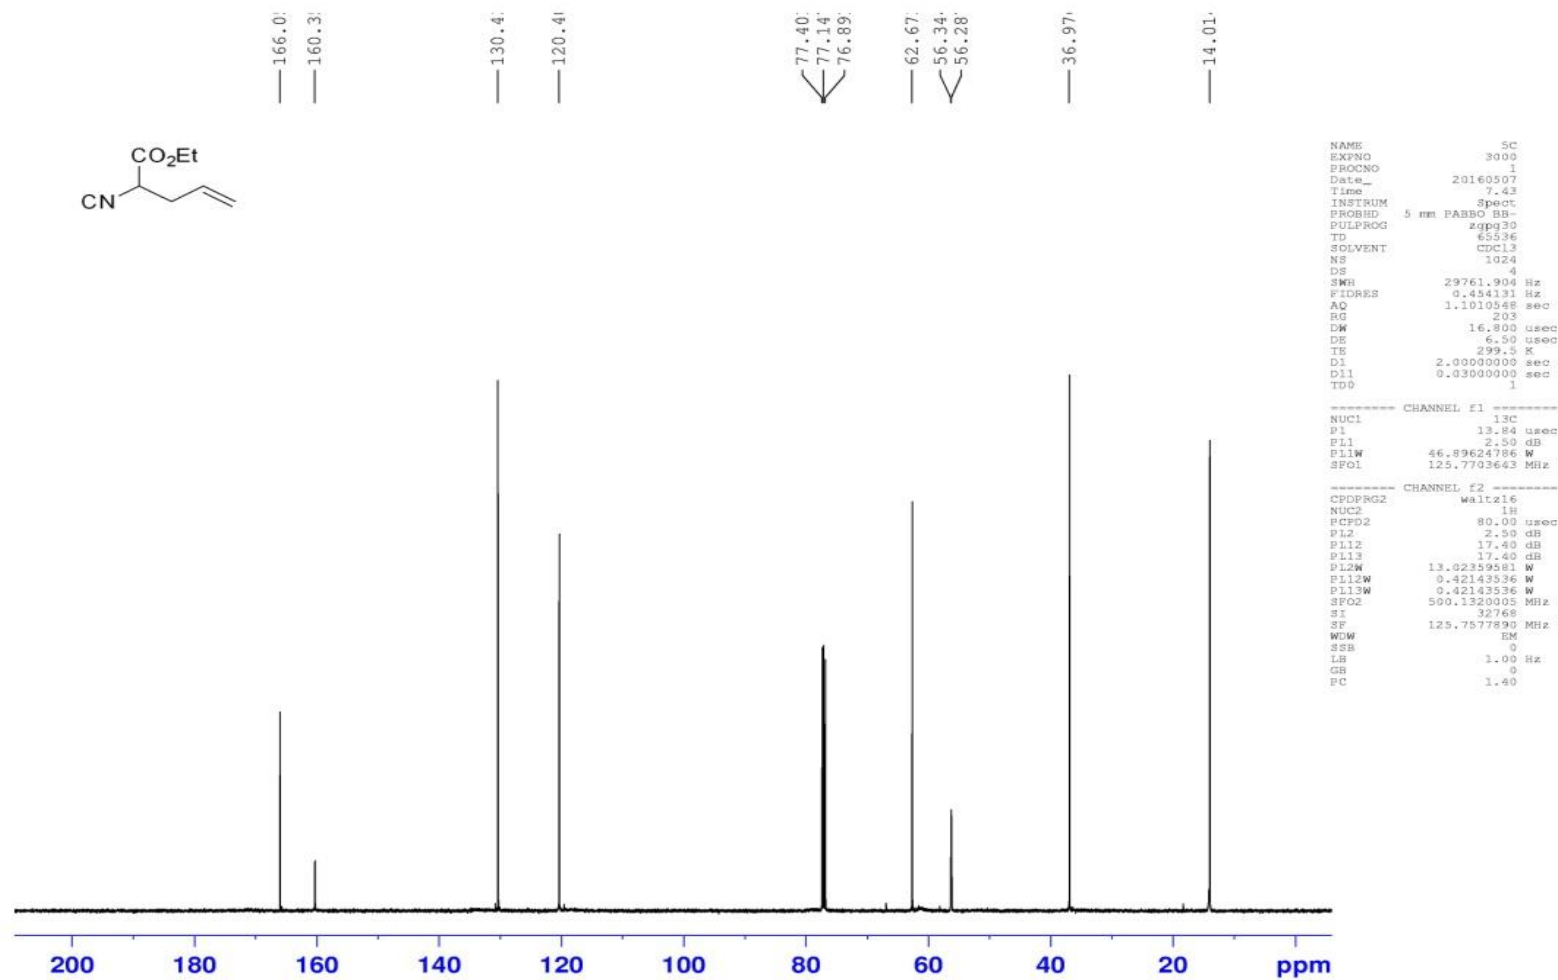



3a

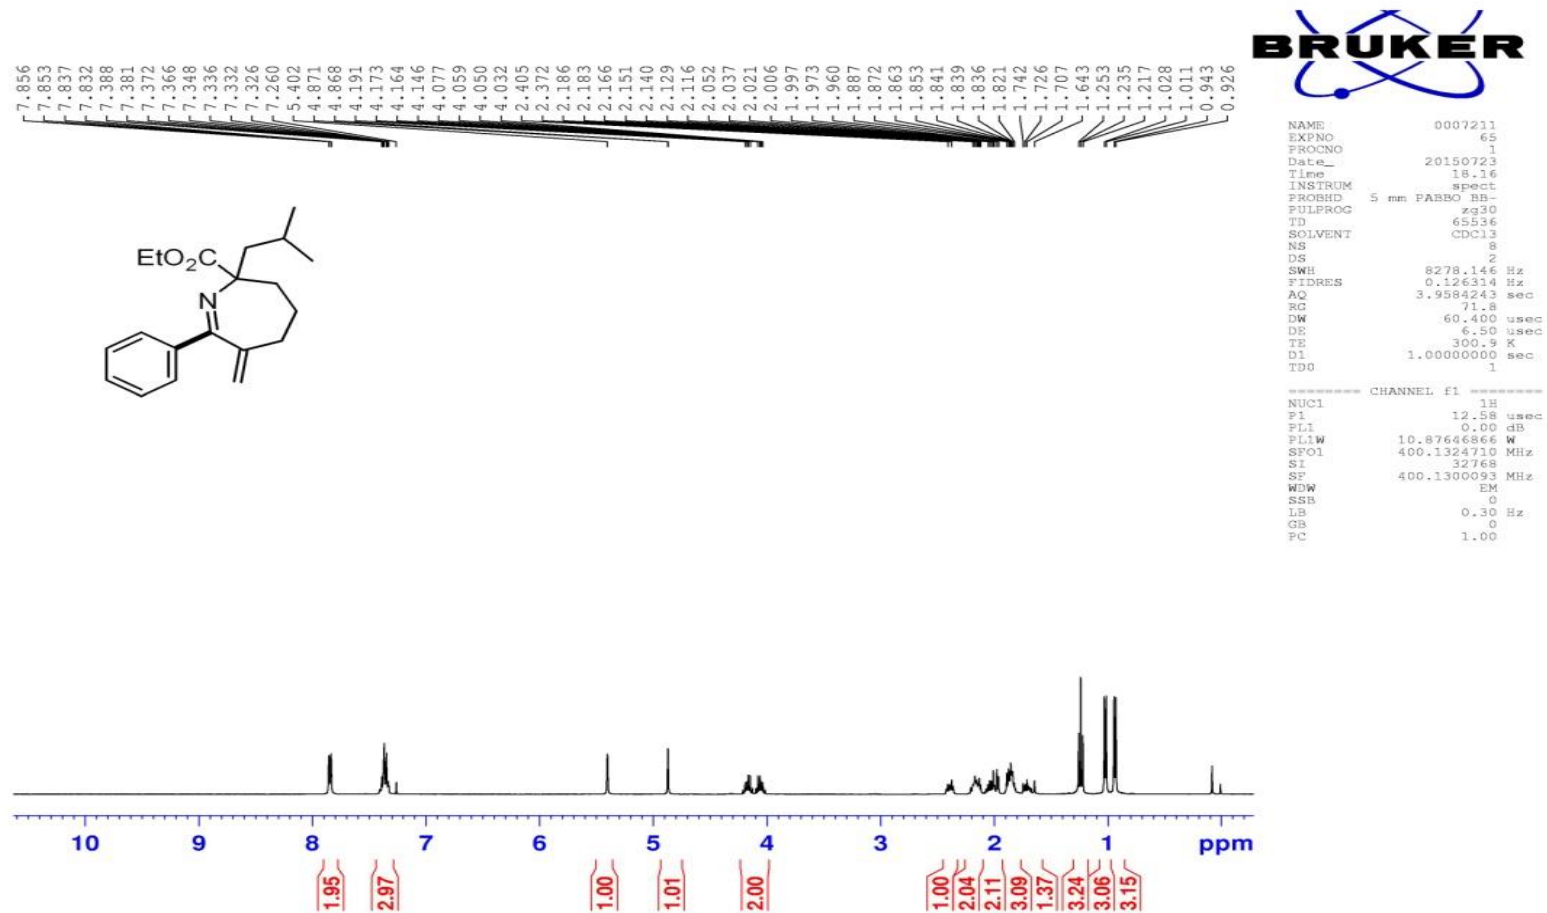

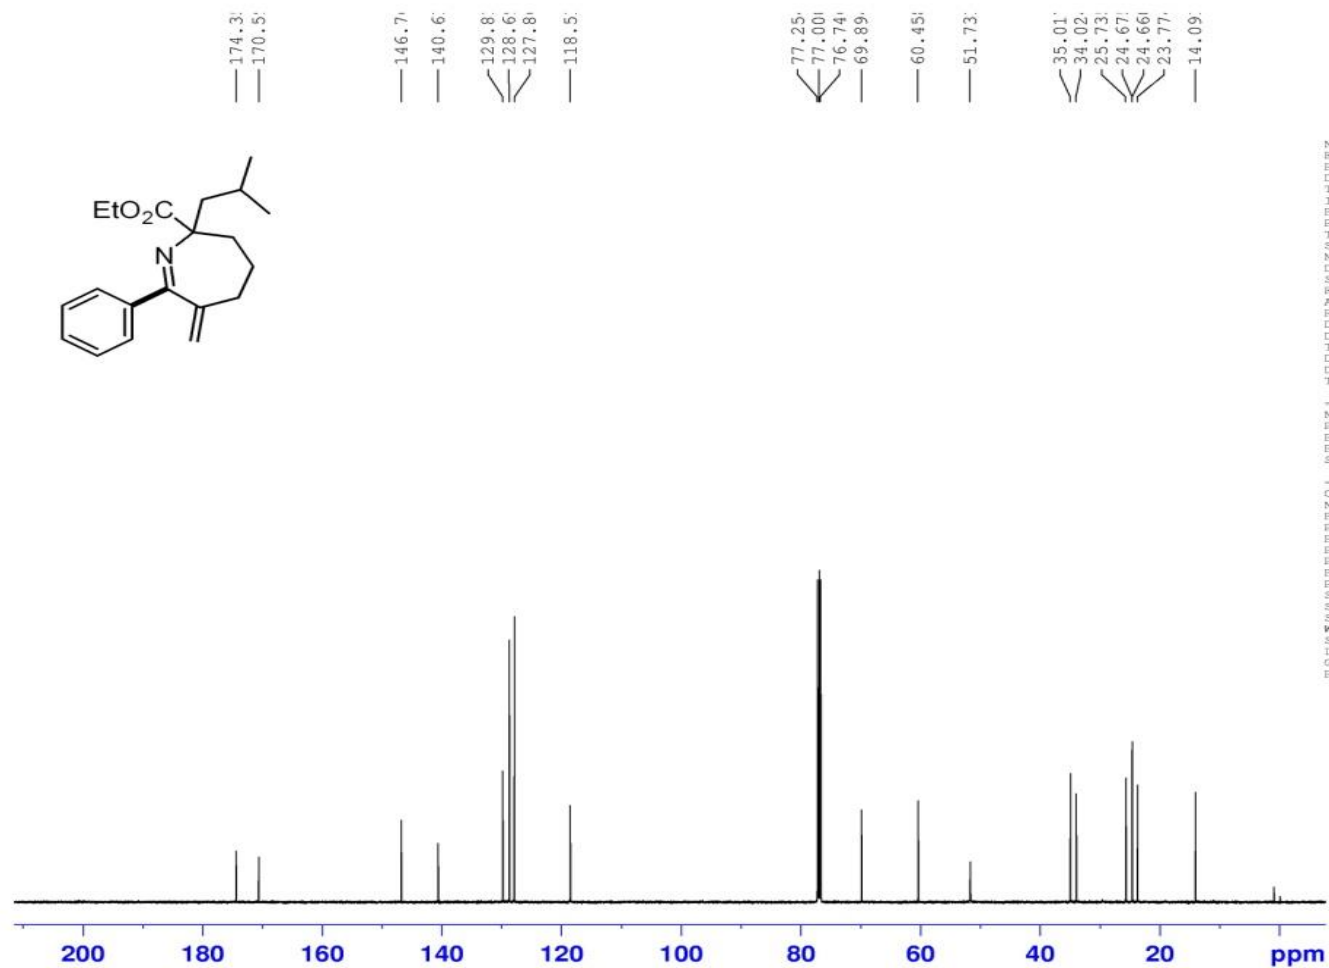

50

### 3a-HMBC

70061

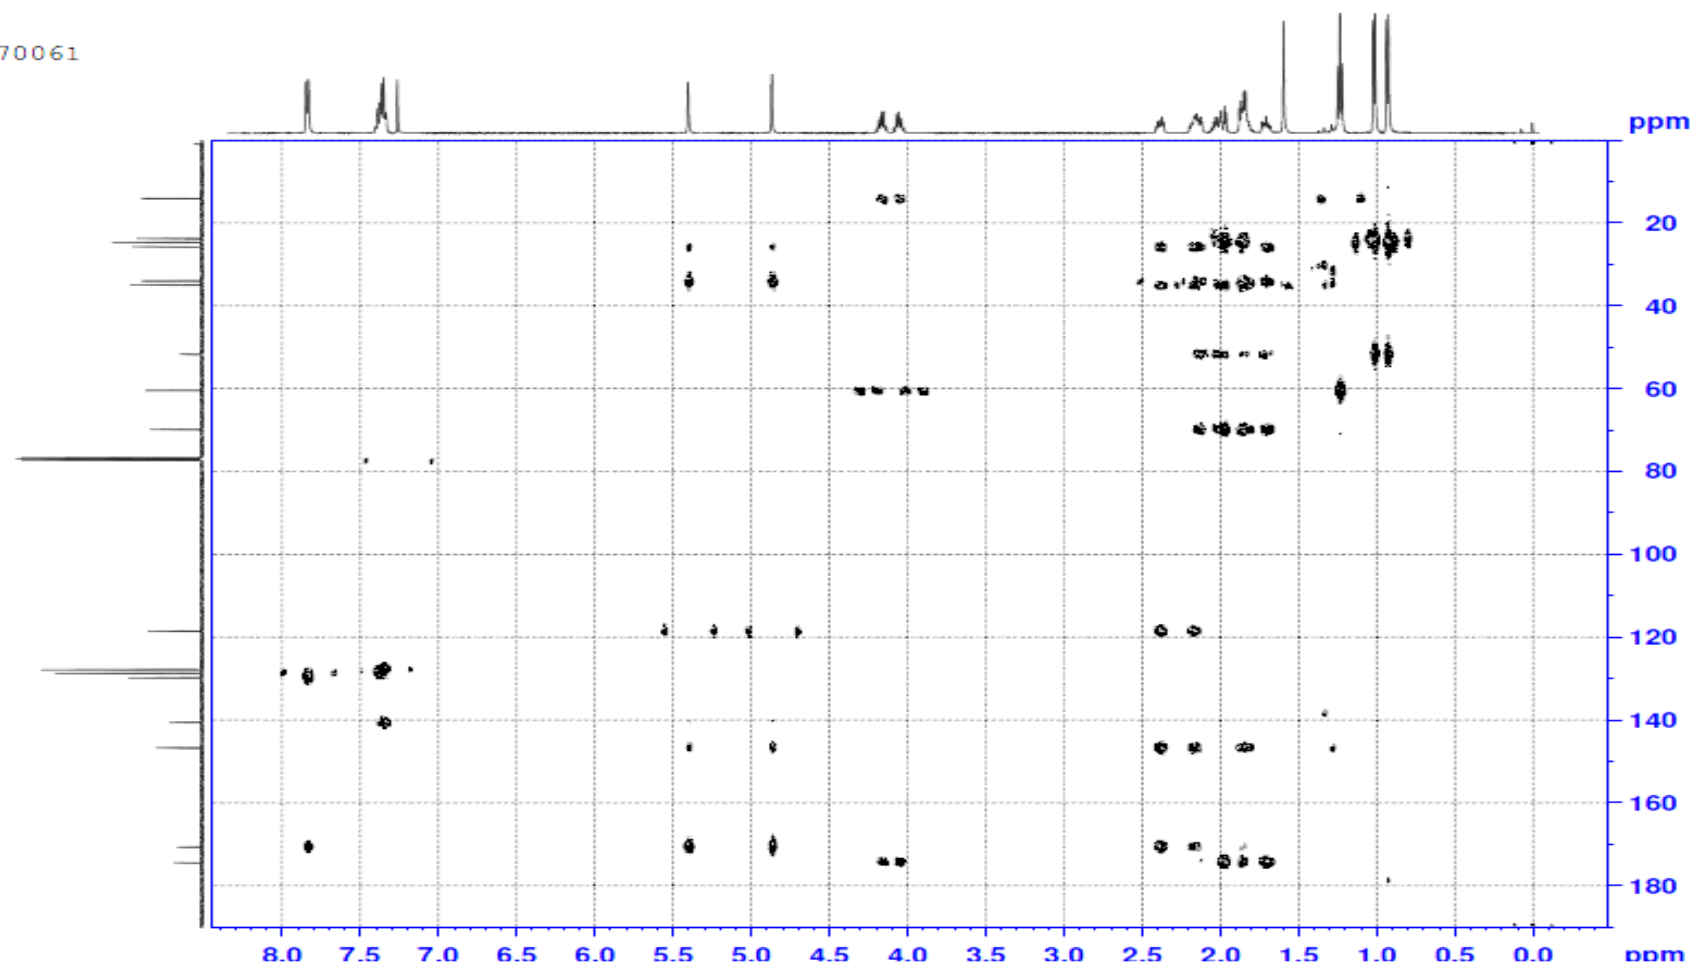

### 3a-HSQC

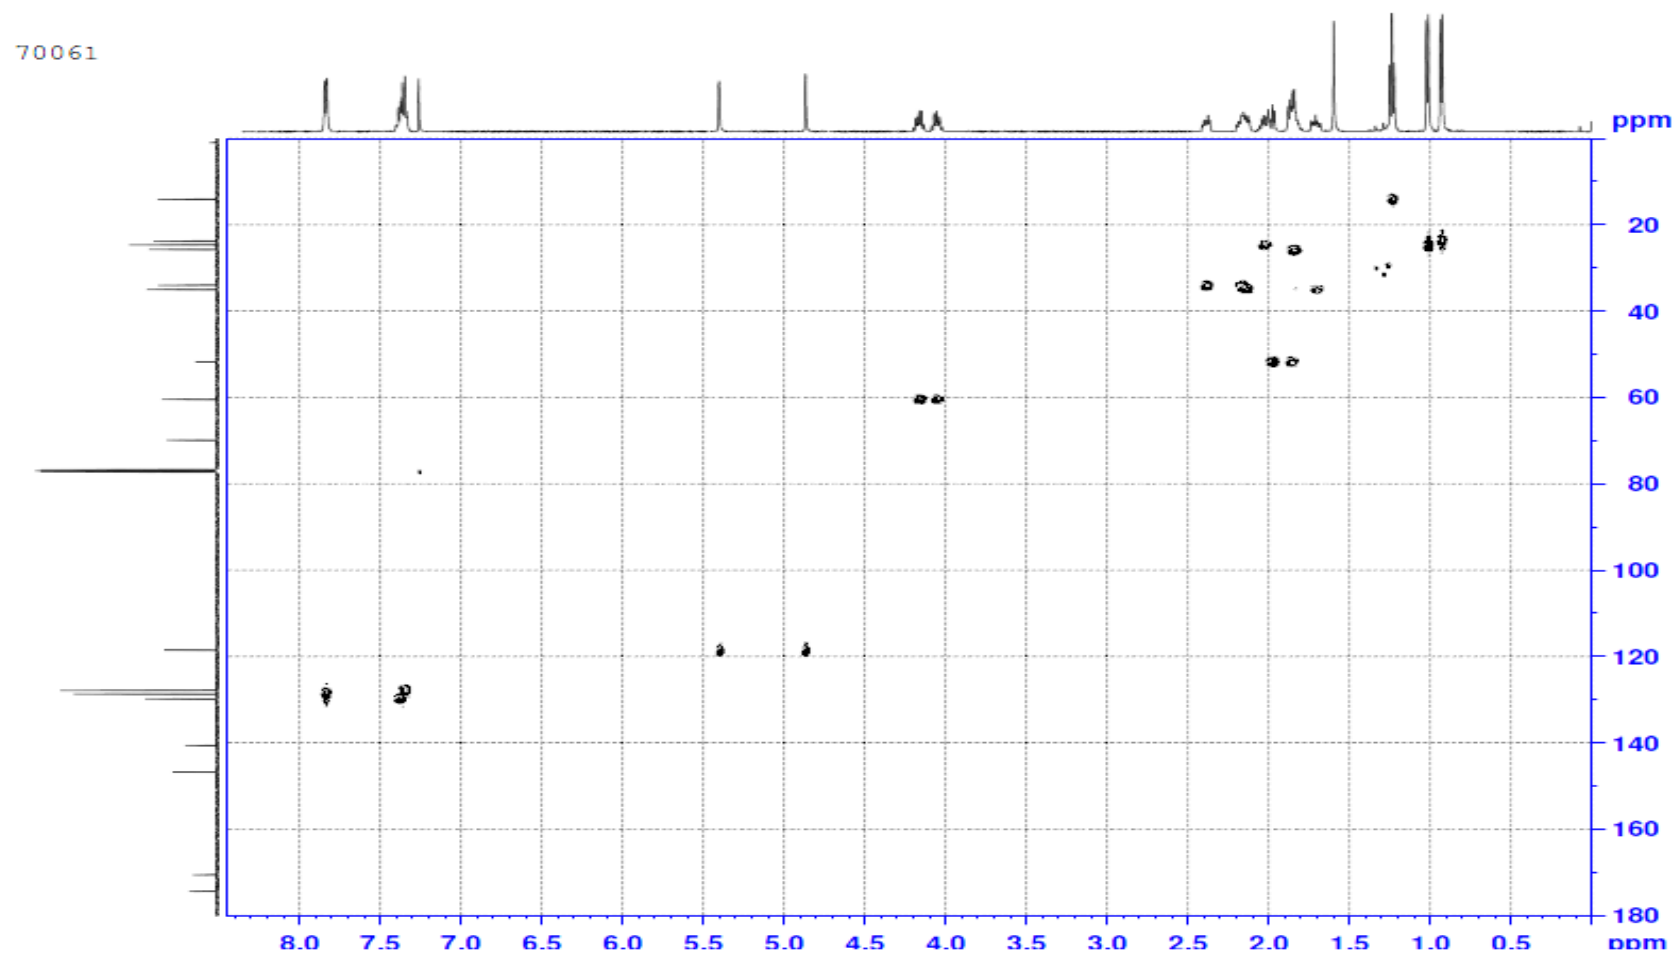

**3a-COSY**

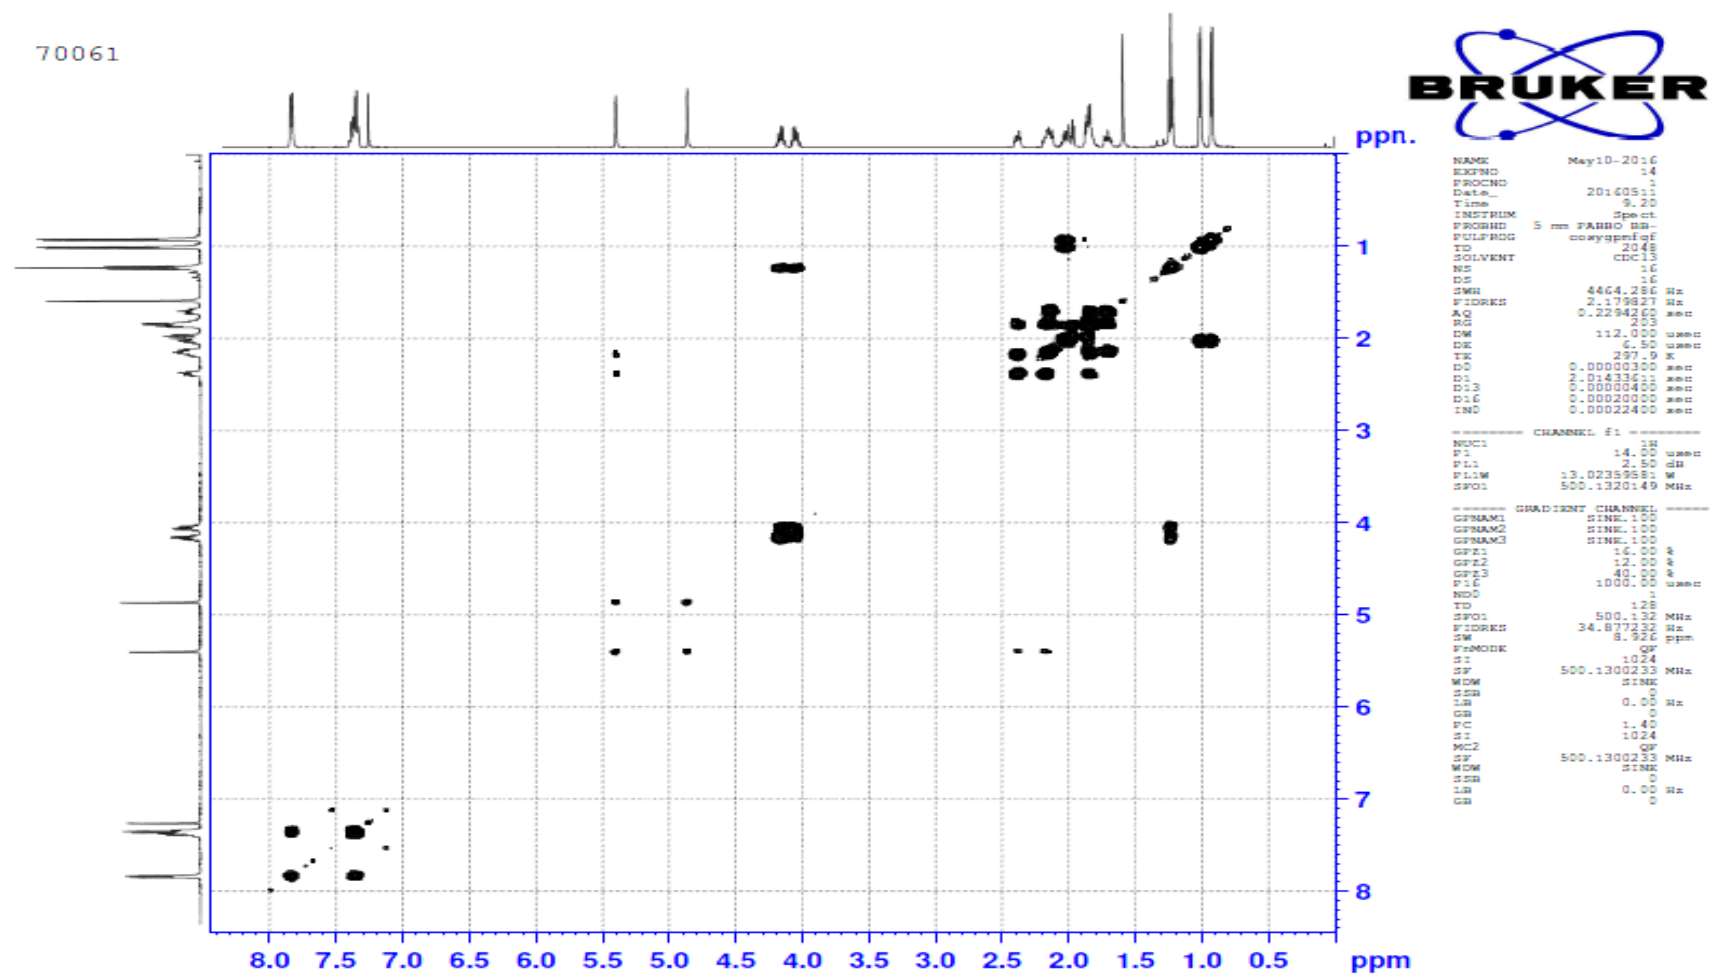

### 3a-NOE

70061

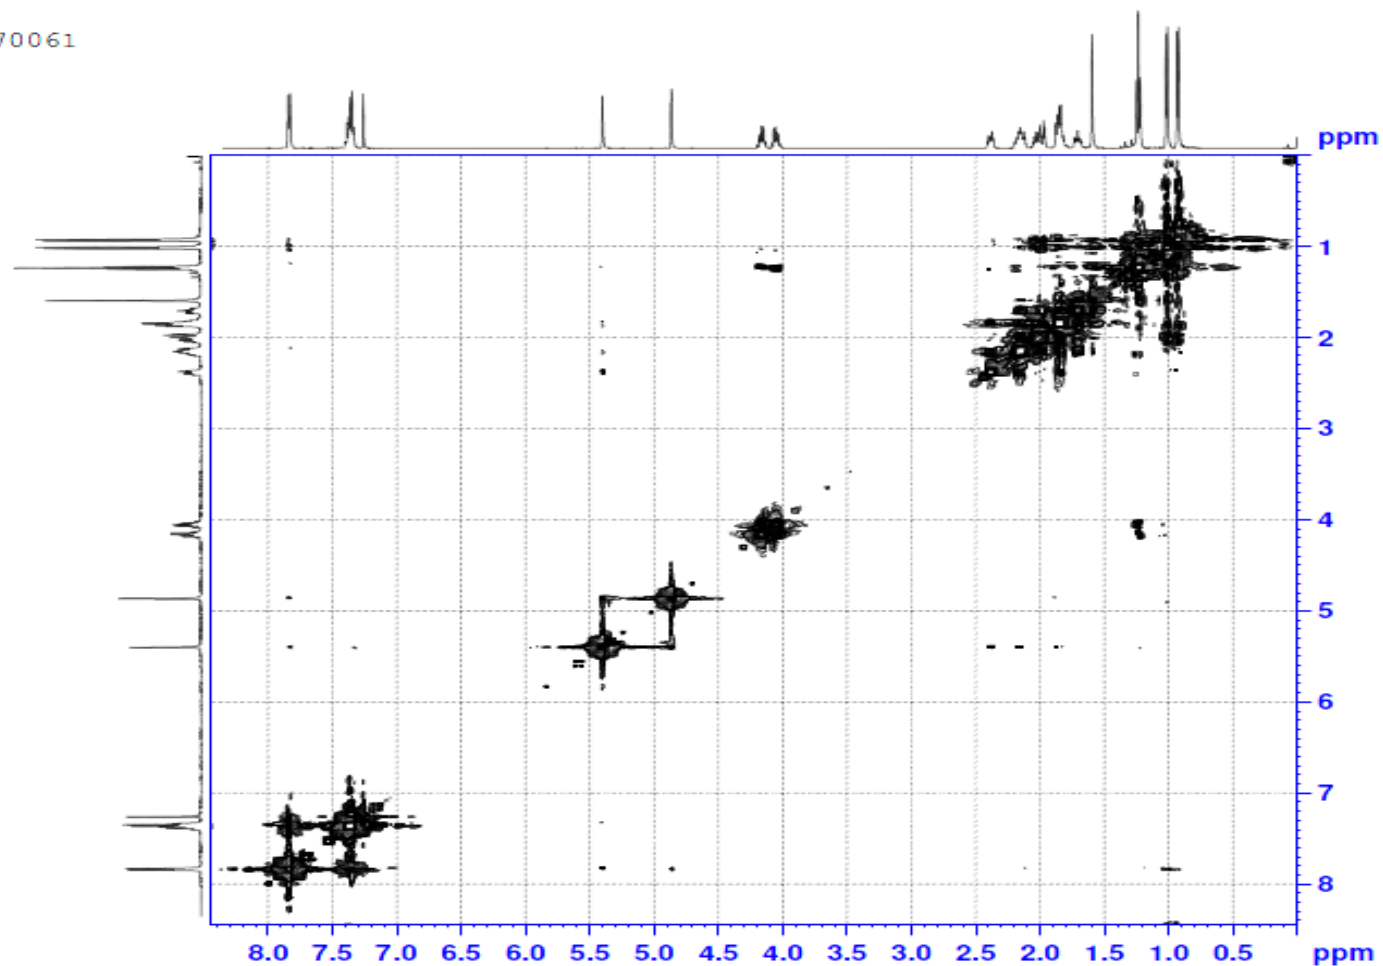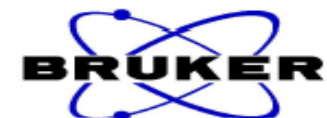

```

NAME          May10-2016
EXPNO         17
PROCNO        1
Date_         20160511
Time         13.59
INSTRUM       Spect
PROBHD        5 mm PABBO BB-
PULPROG       noesyph
TD            2648
SOLVENT       CDCl3
NS            32
DS            16
SWH           4466.286 Hz
FIDRES        2.179827 Hz
AQ            0.2294260 sec
RG            101
DW            112.000 usec
DE            6.50 usec
TE            298.0 K
D0            0.00009417 sec
D1            2.01433611 sec
DS            0.30000001 sec
IN0           0.00022400 sec
  
```

```

CHANNEL F1 == 1H
NUC1       1H
P1          14.00 usec
PL1         2.50 dB
PL1W        13.02359581 W
SFO1        500.1320149 MHz
NUC2
TD          128
SFO2        500.132 MHz
FIDRES      34.877232 Hz
SW           8.926 ppm
F2MODE      States-TPP1
SI          1024
SF          500.1300233 MHz
WDW          QFINE
SSB          2
LB           0.00 Hz
GB           0
PC           1.00
SI          1024
MC2          States-TPP1
SF          500.1300233 MHz
WDW          QFINE
SSB          2
LB           0.00 Hz
GB           0
  
```

3b

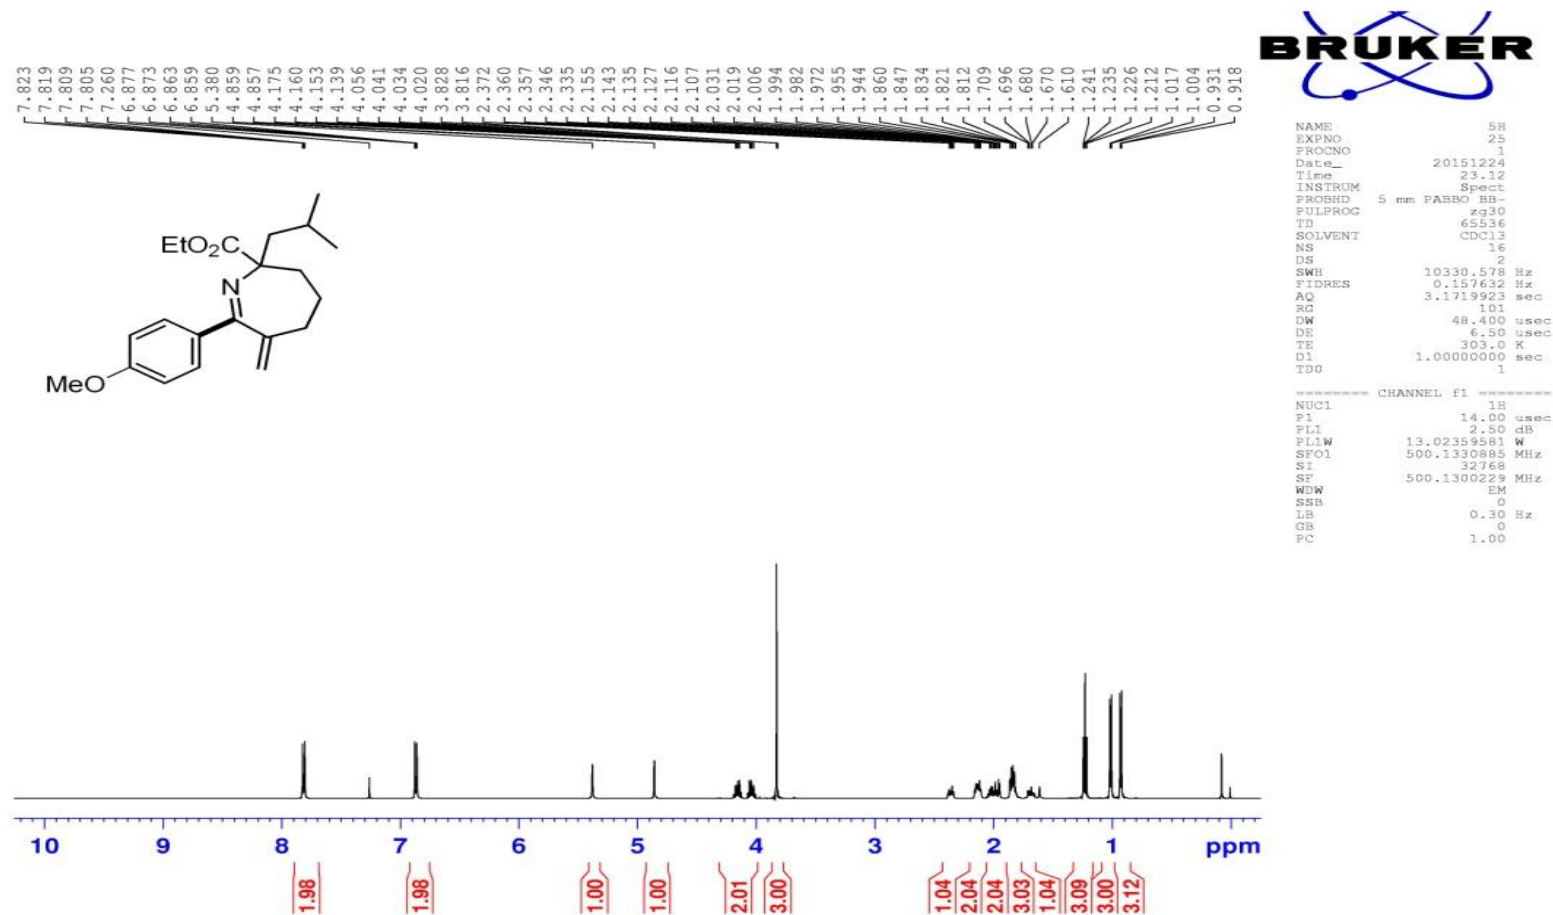

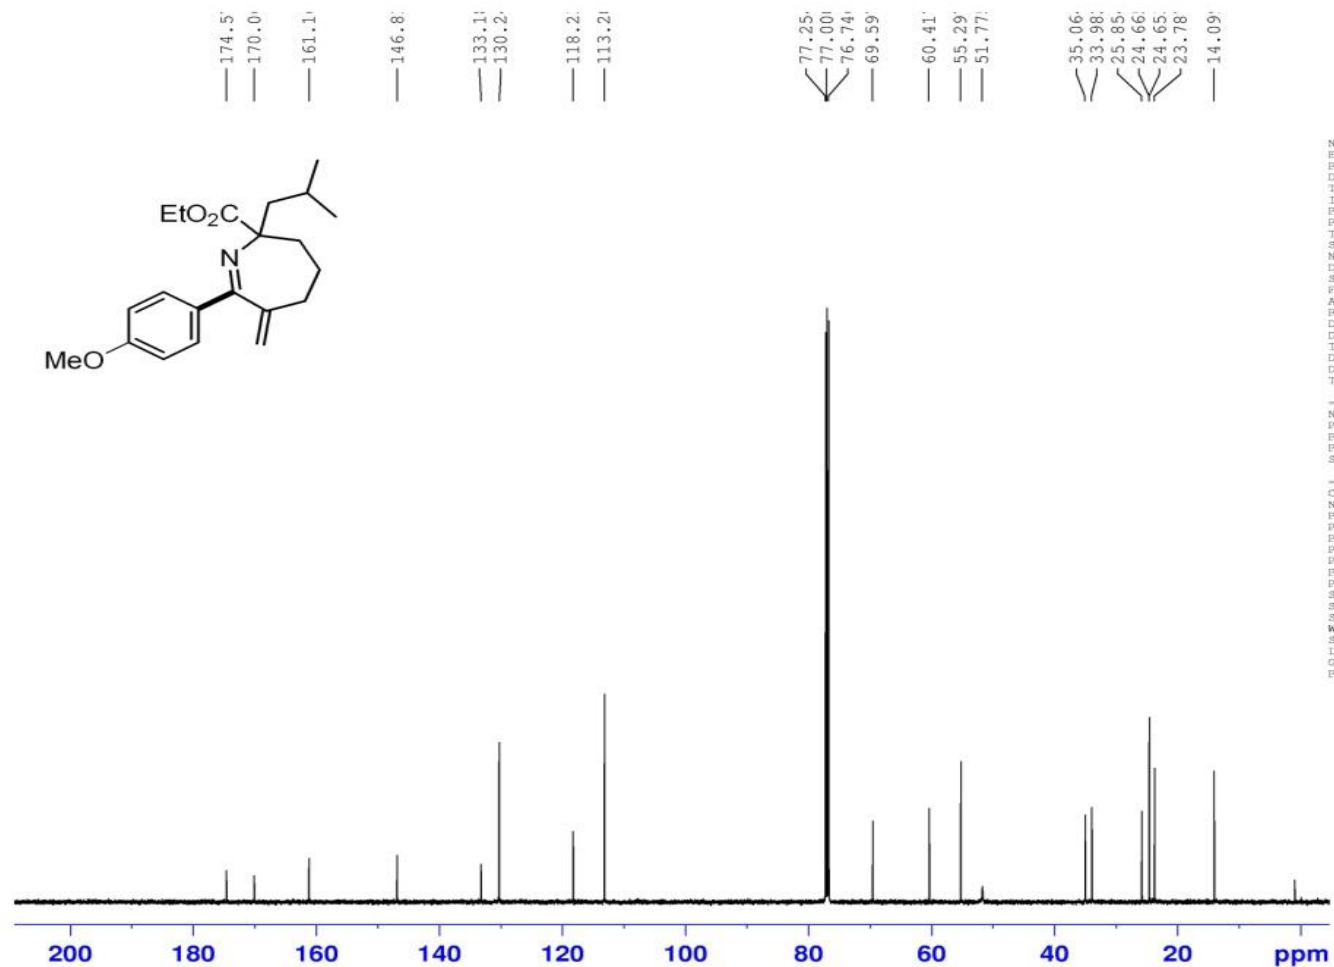

56



### 3c

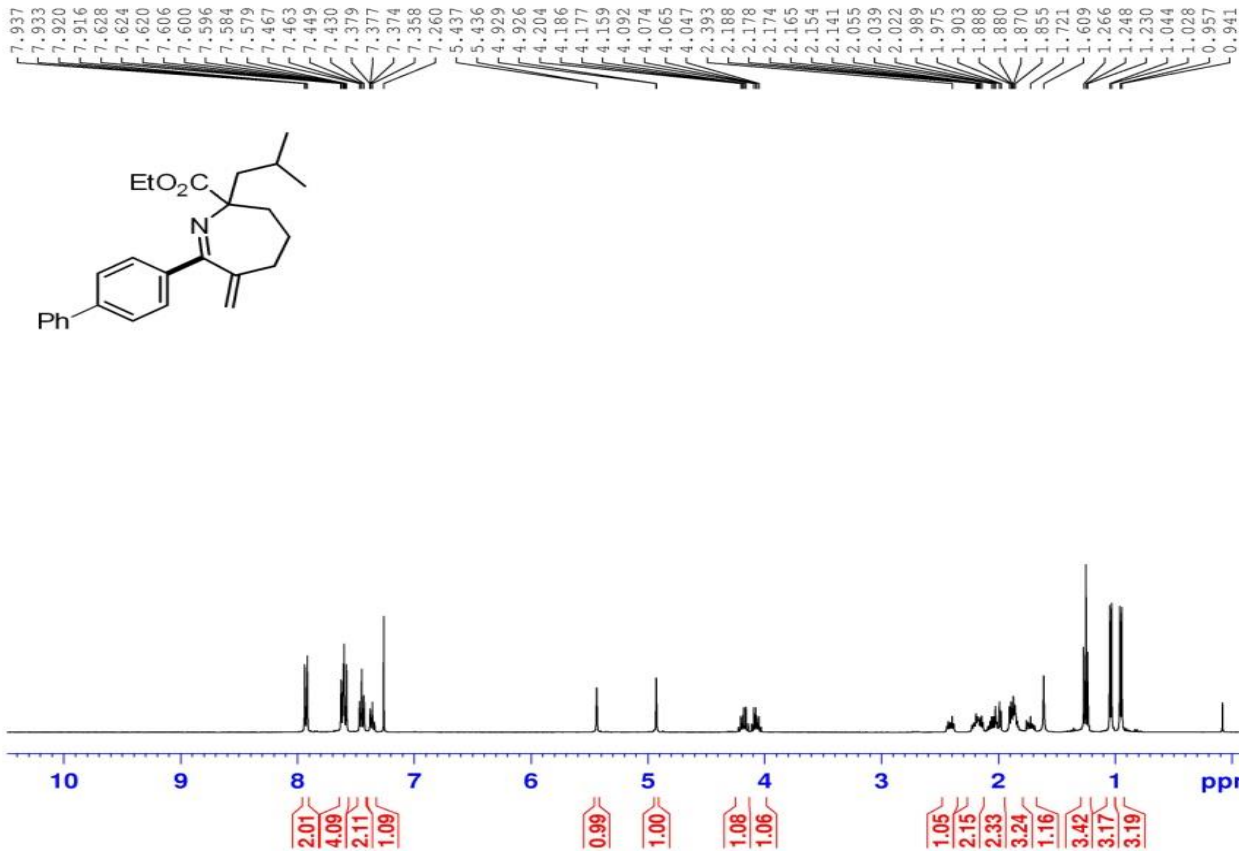

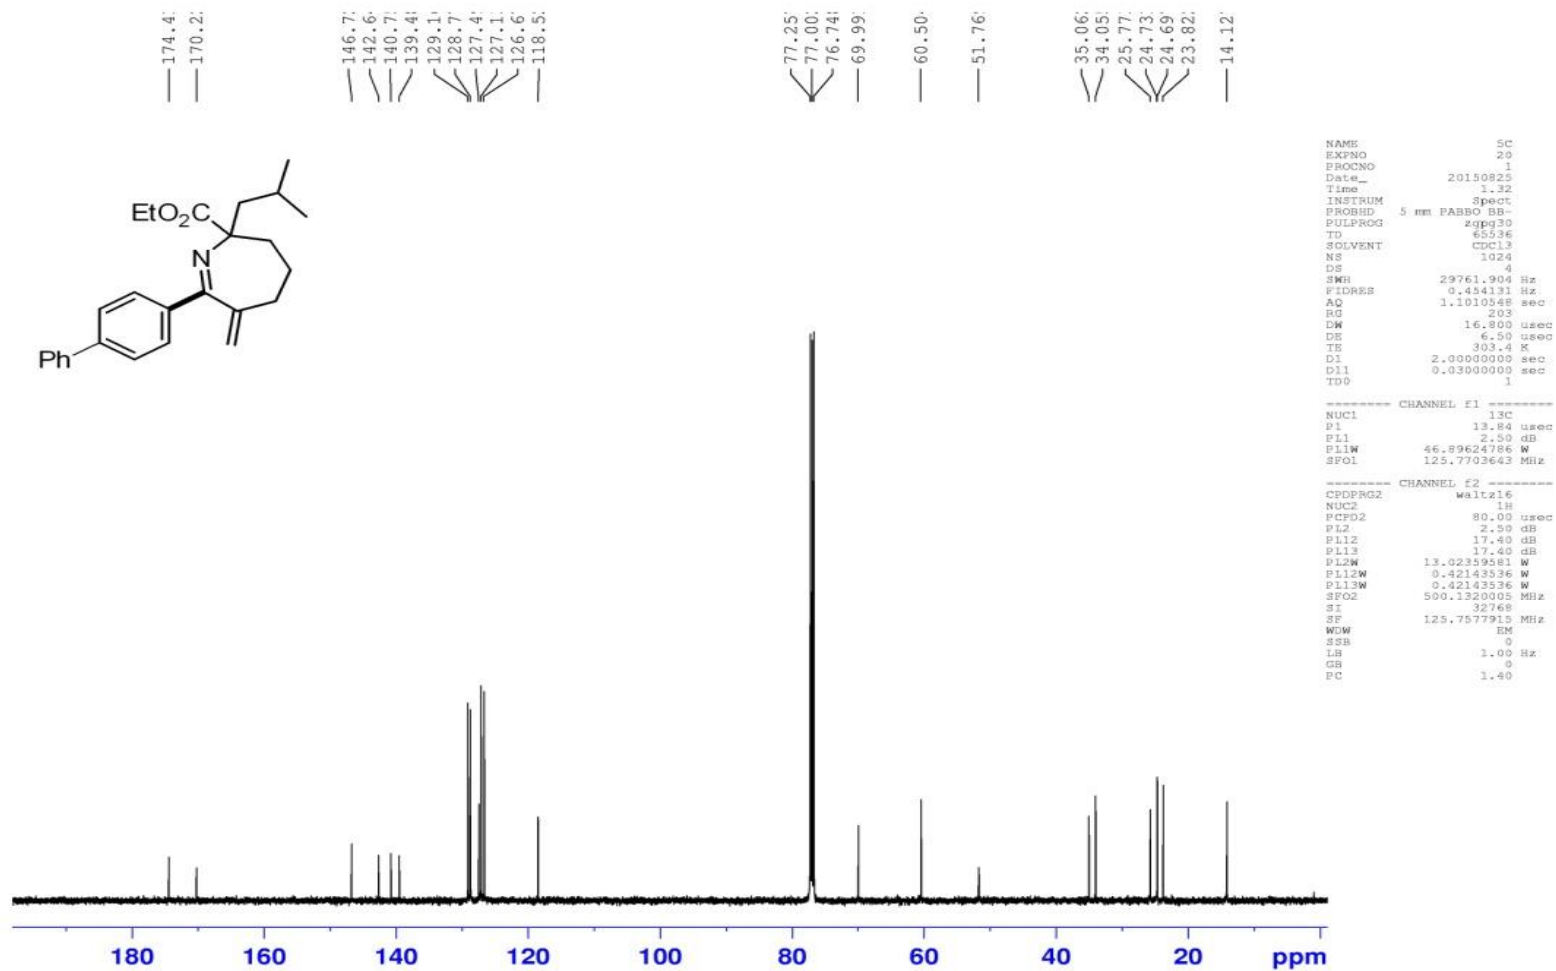

3d

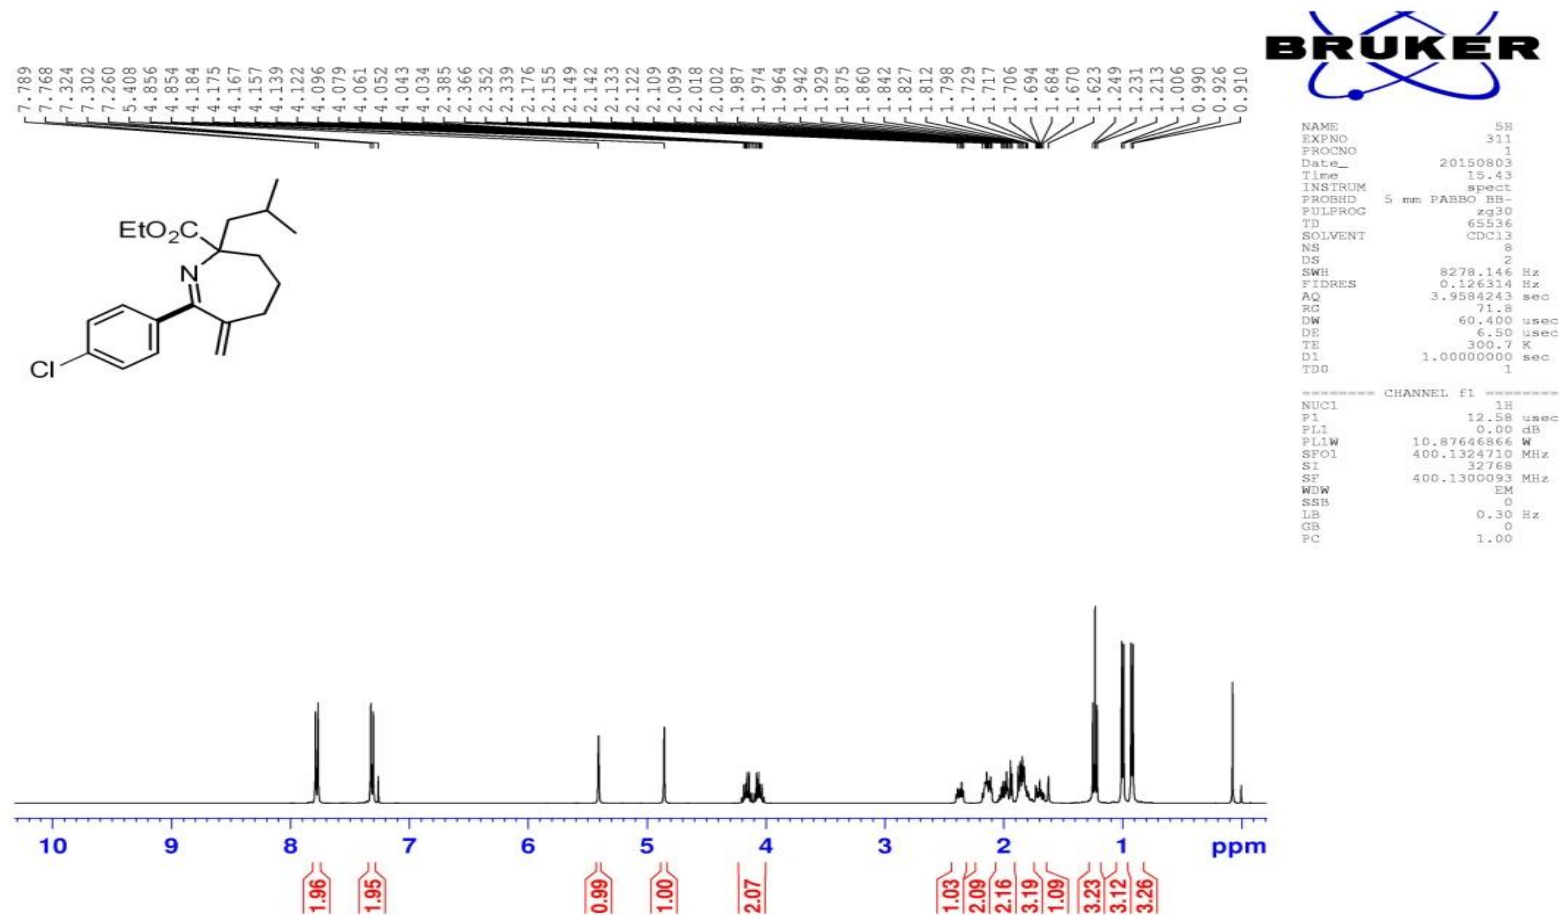

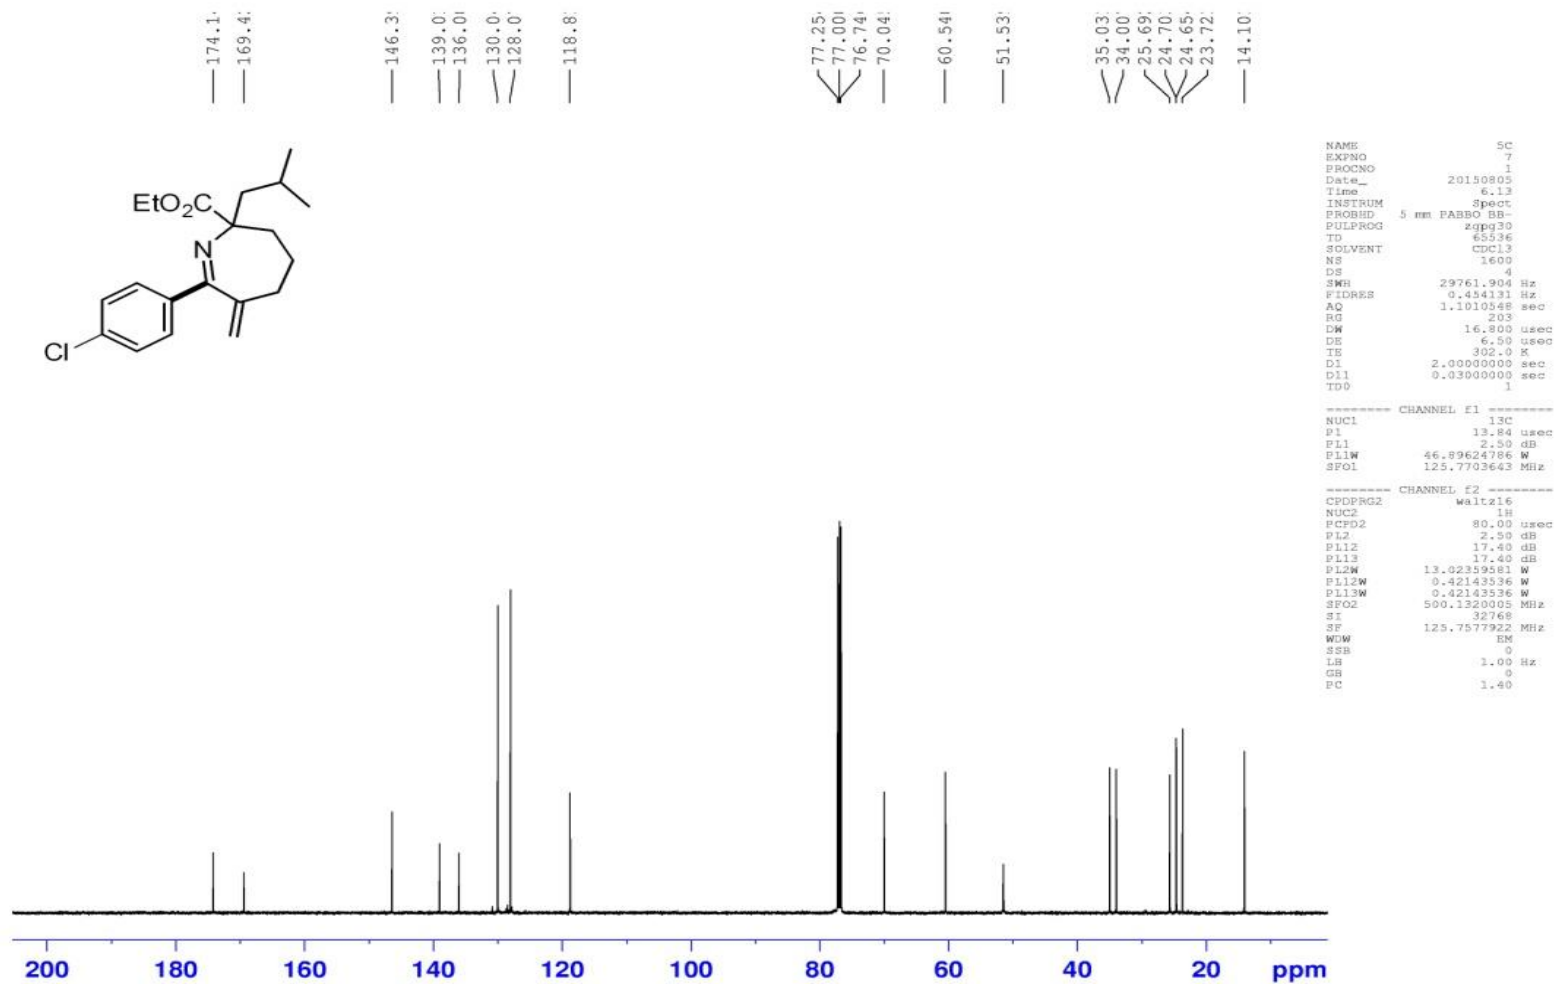

3e

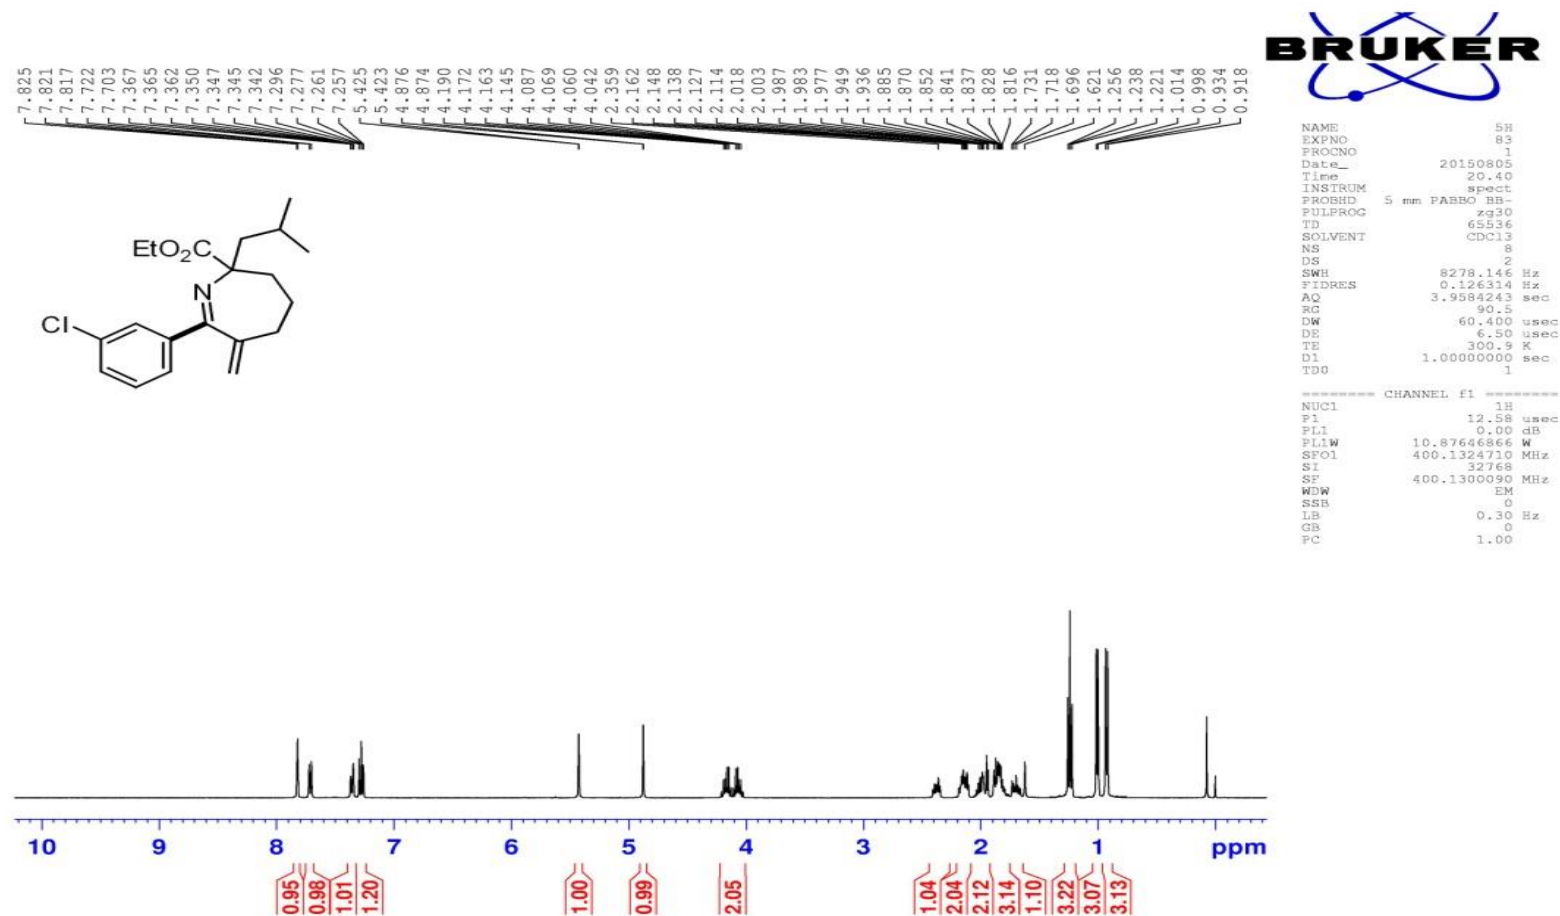

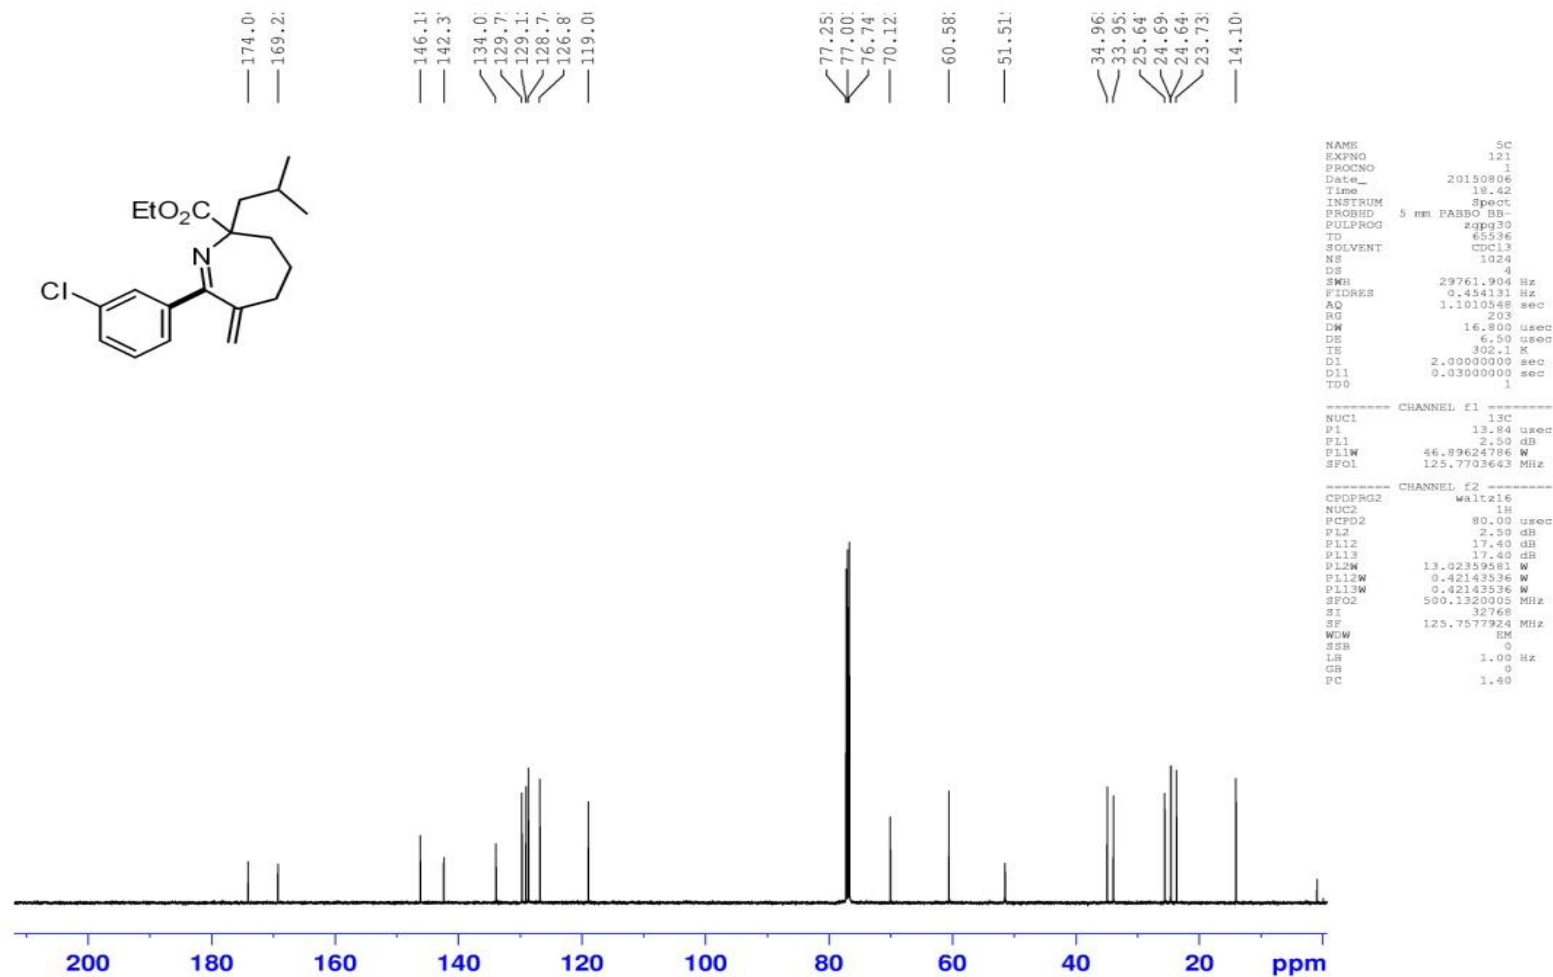

3f

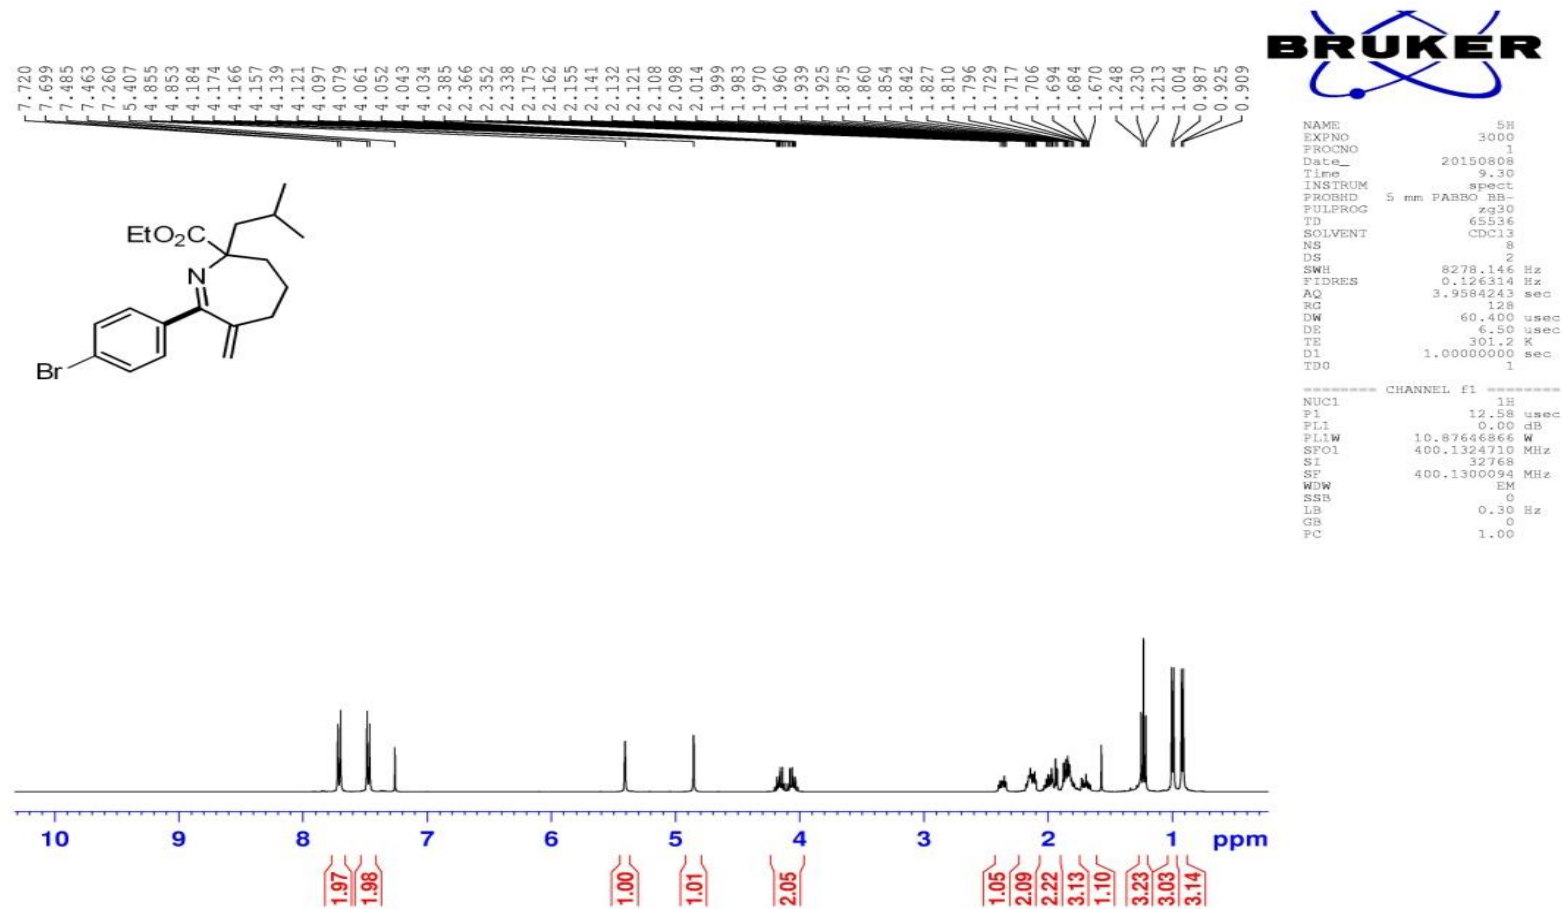

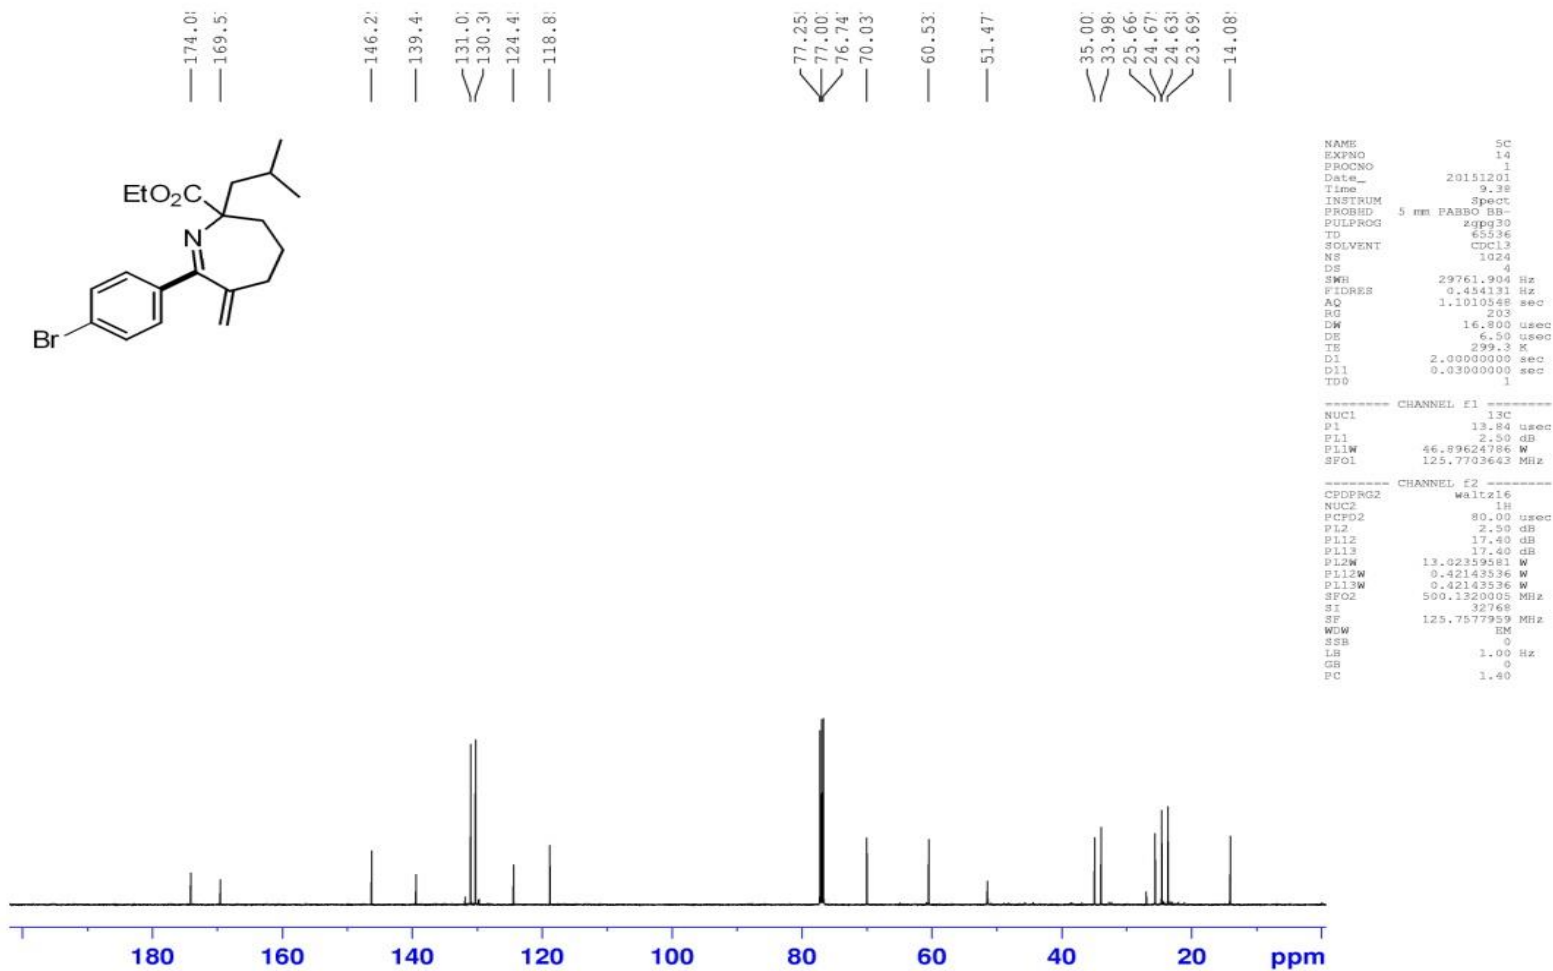



3g

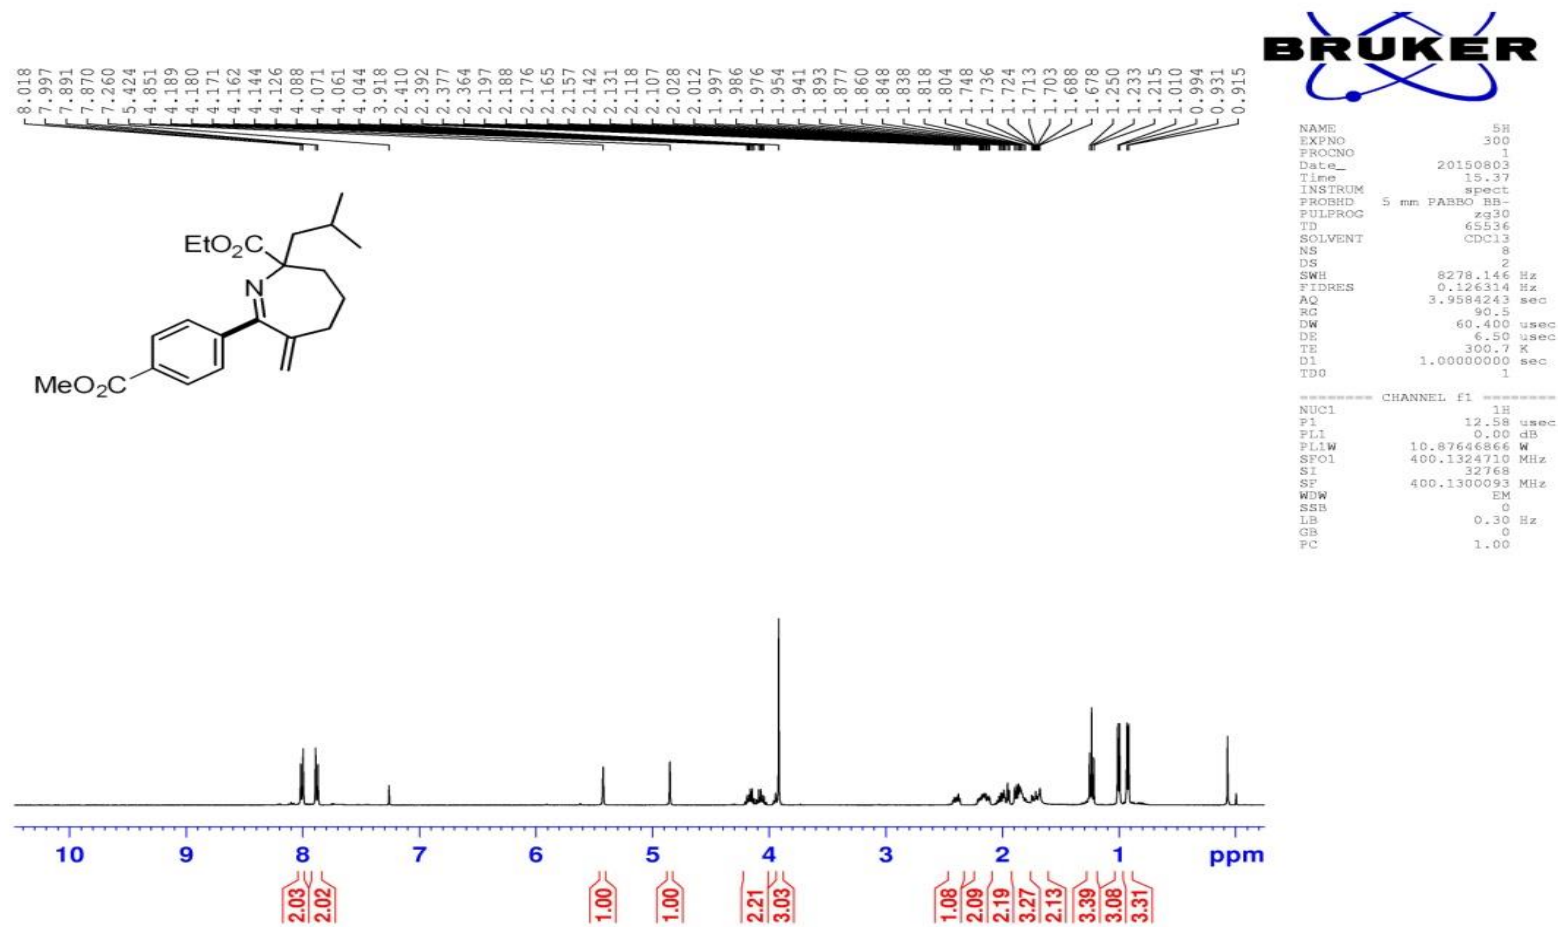

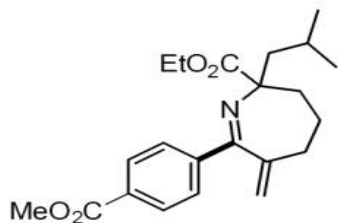

3h

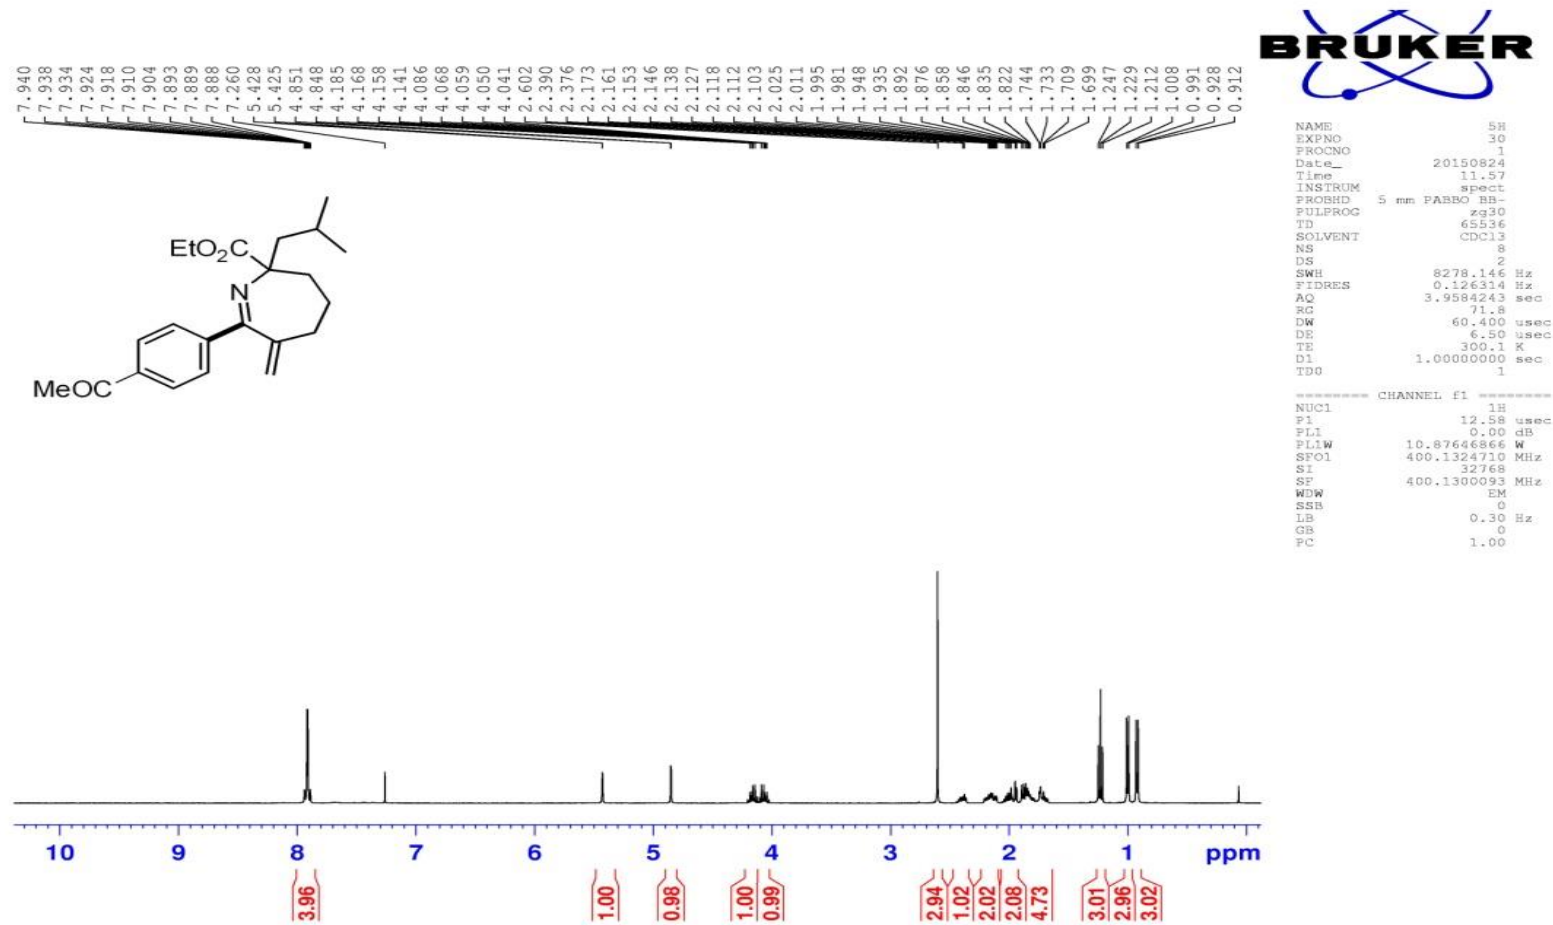

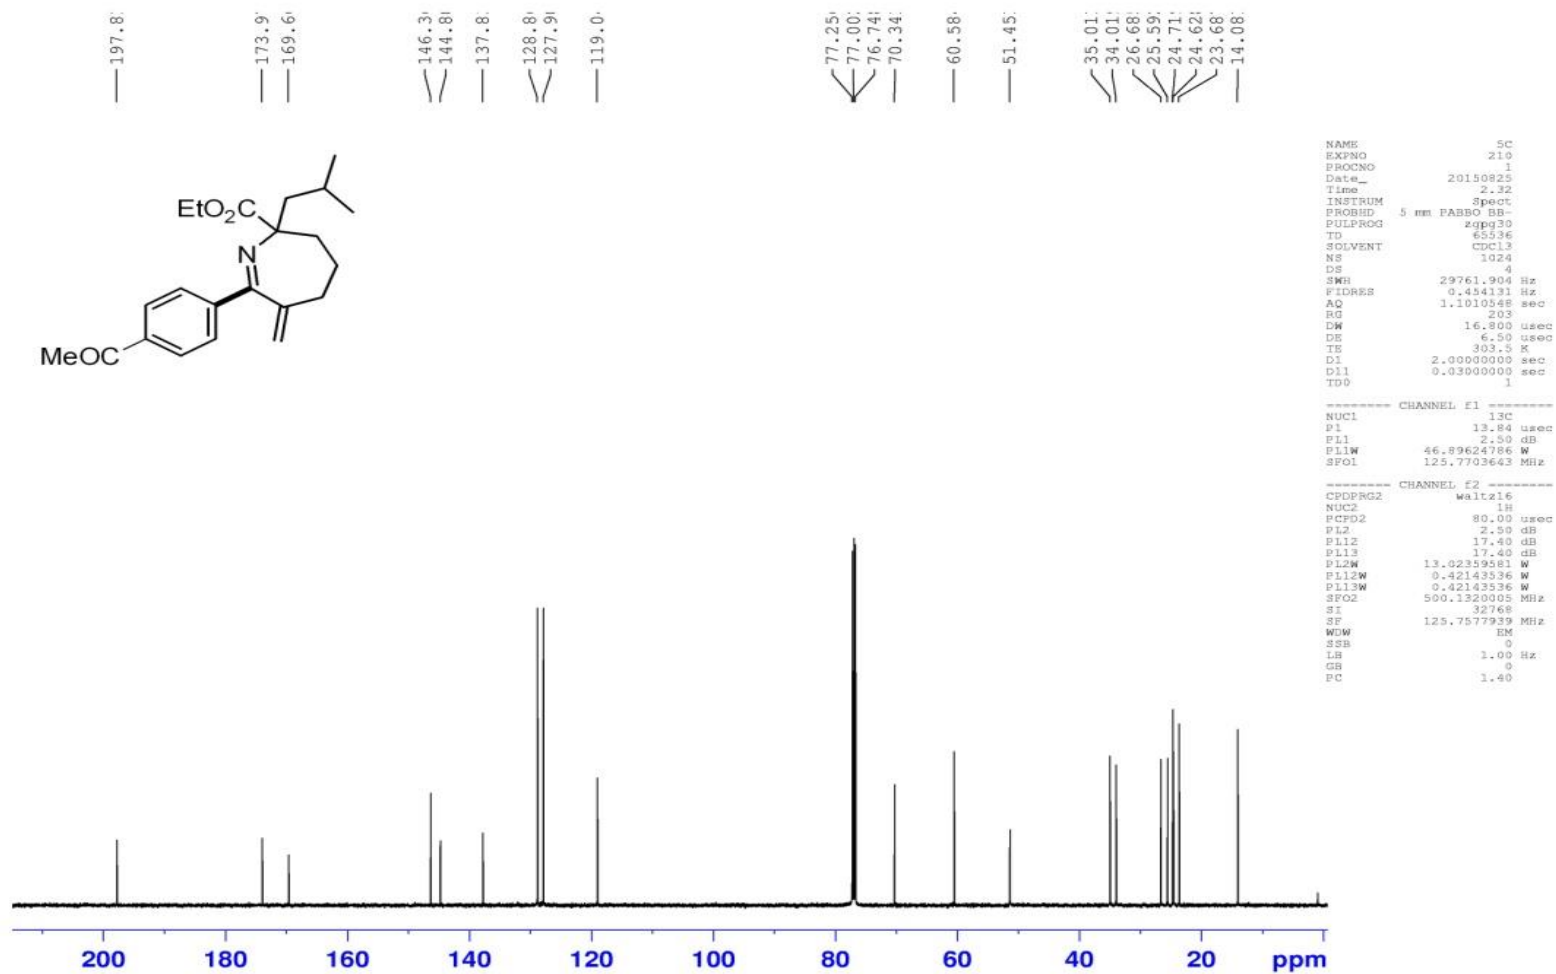

3i

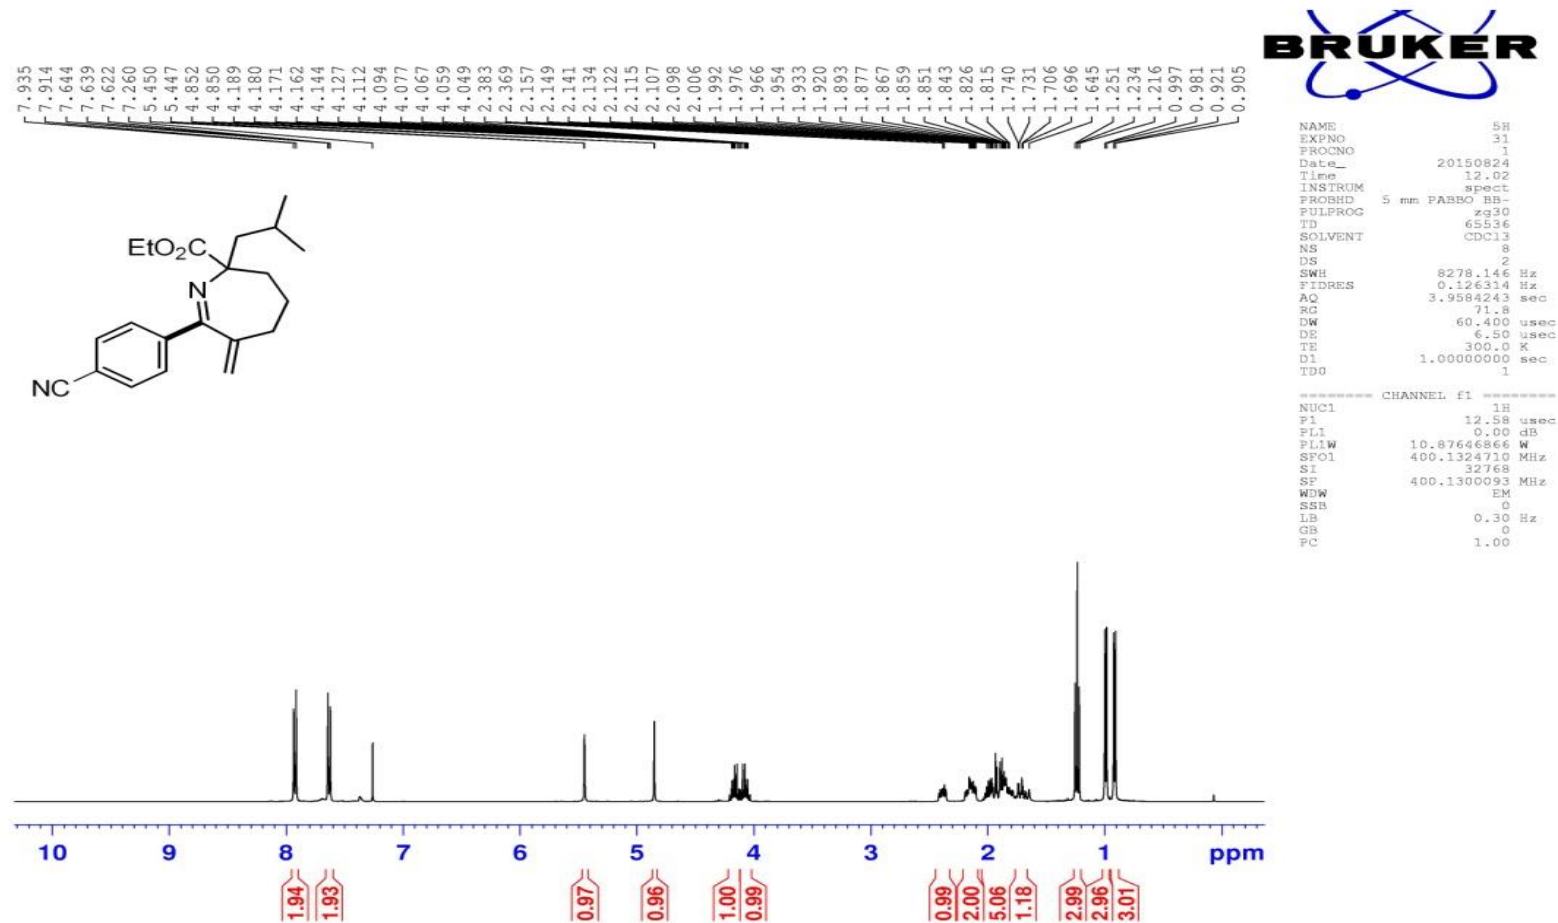

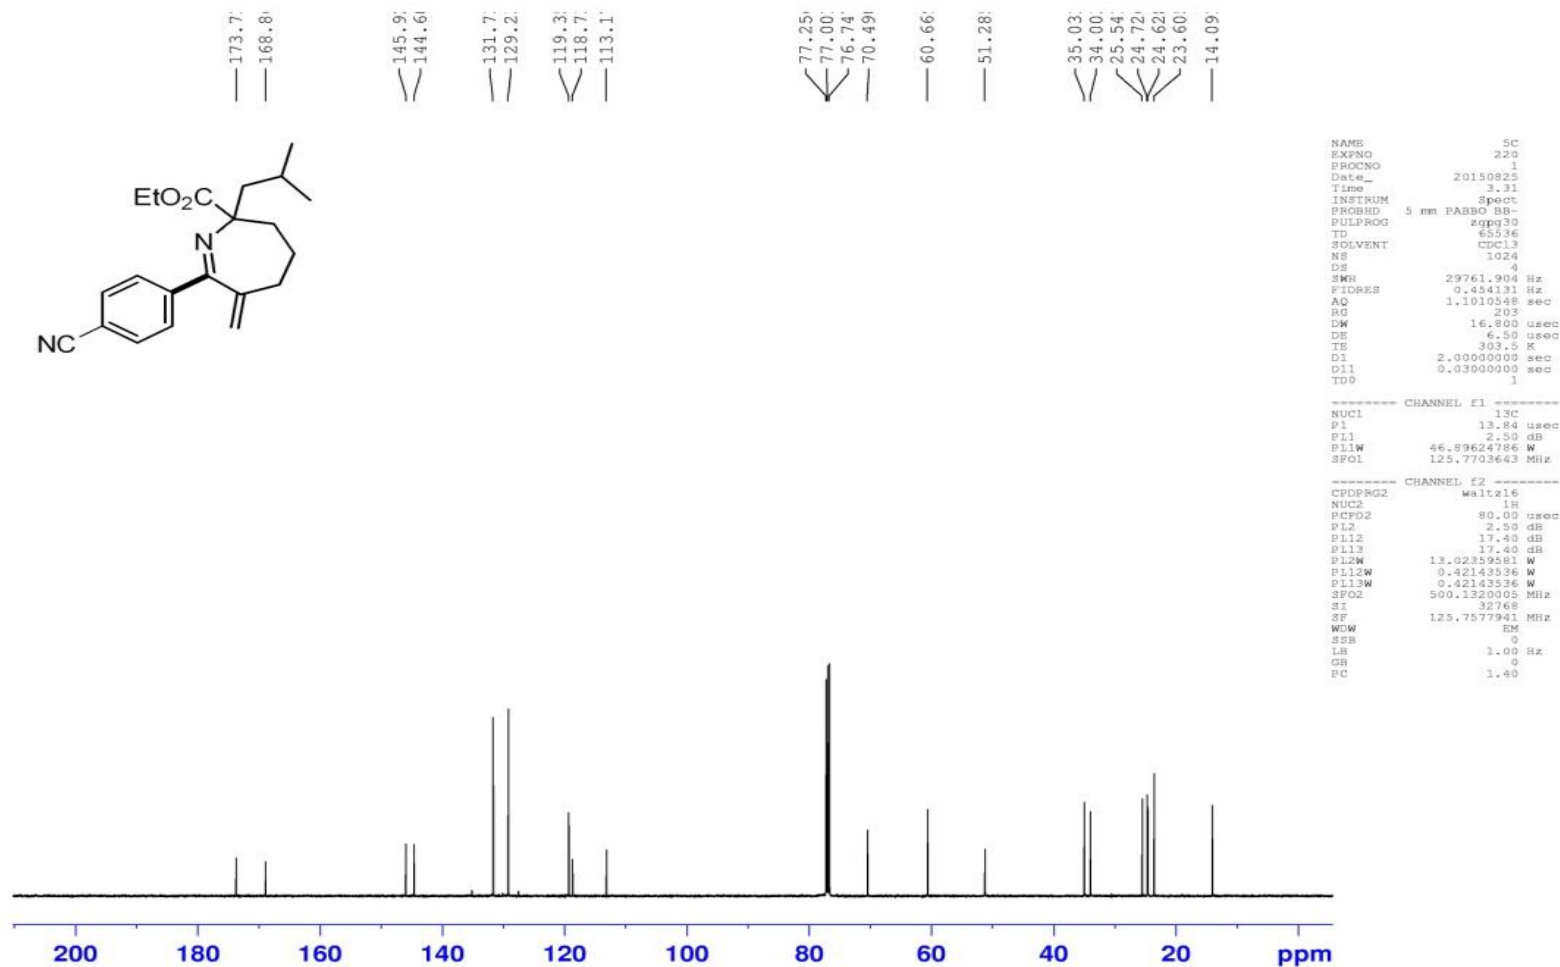

3j

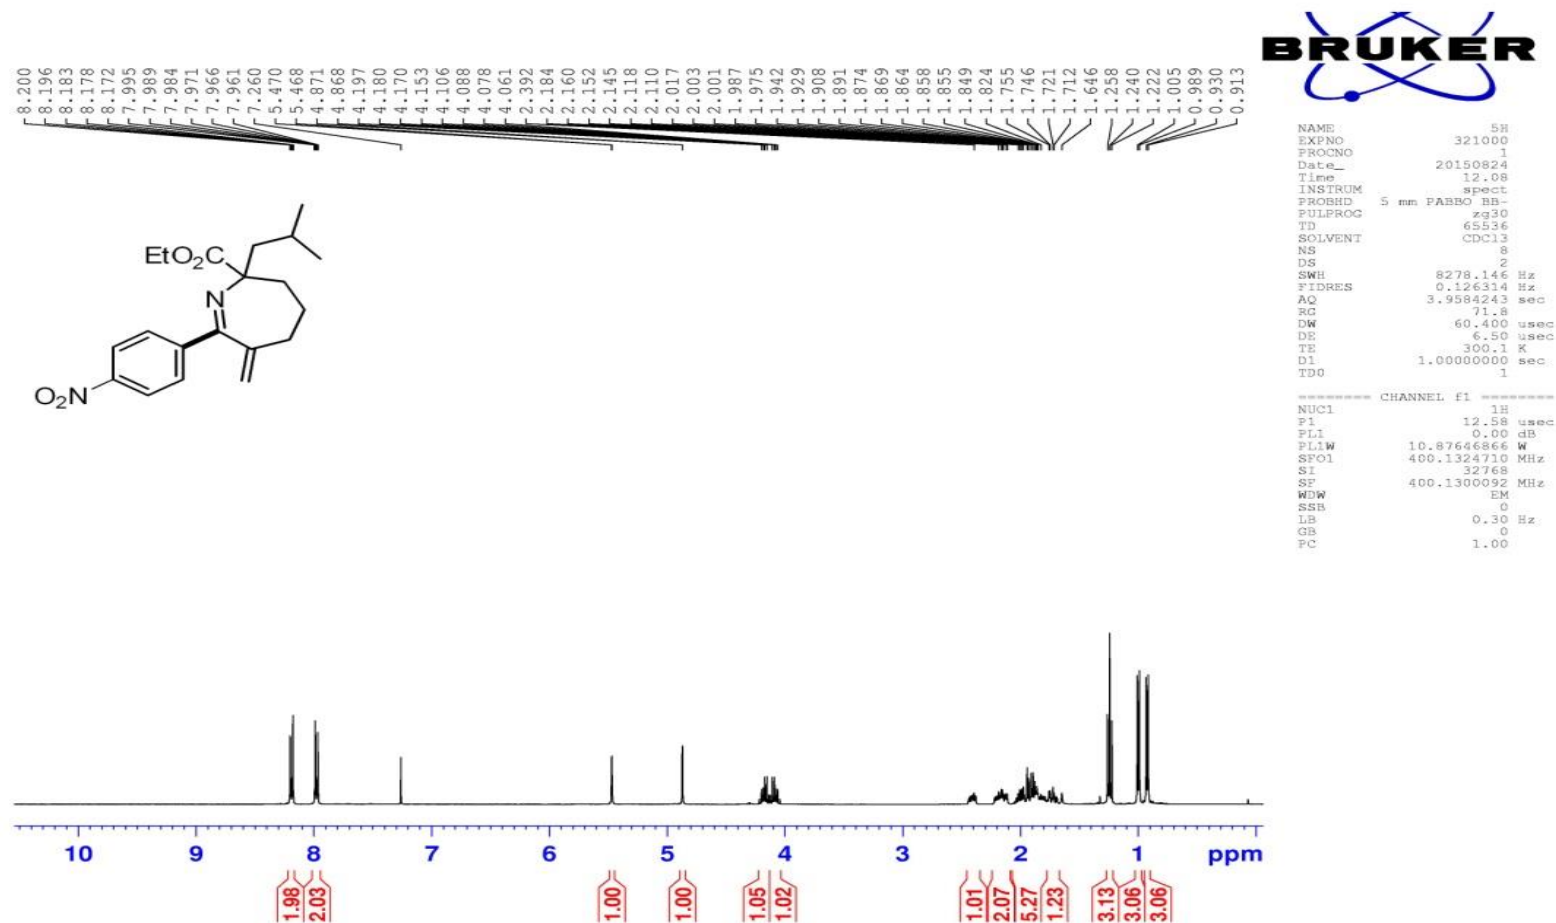

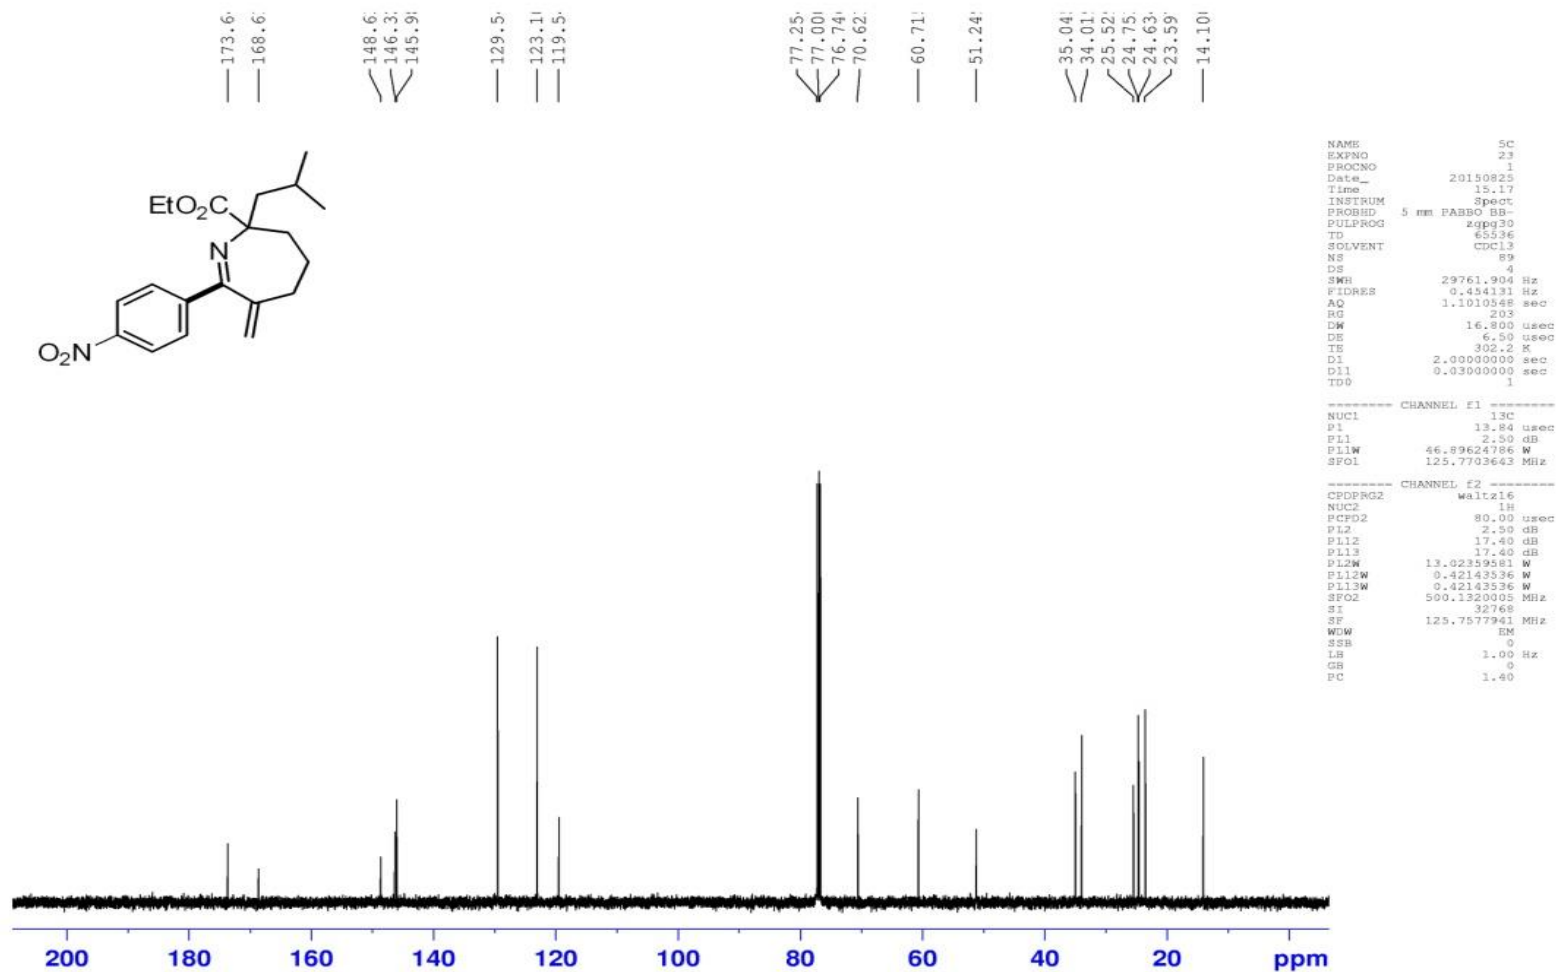



3k

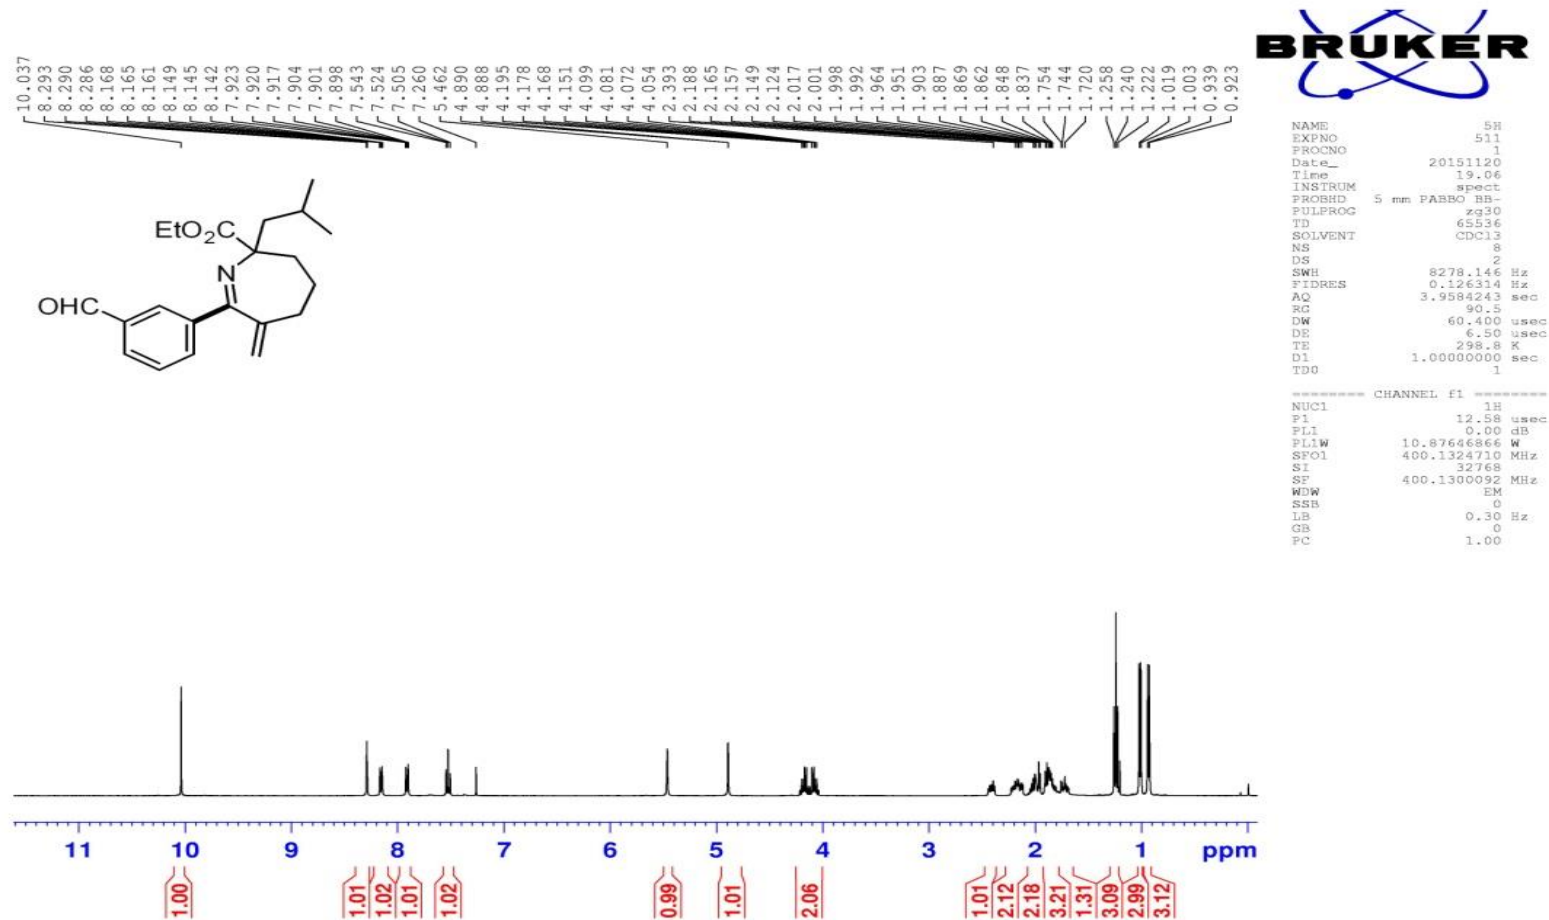

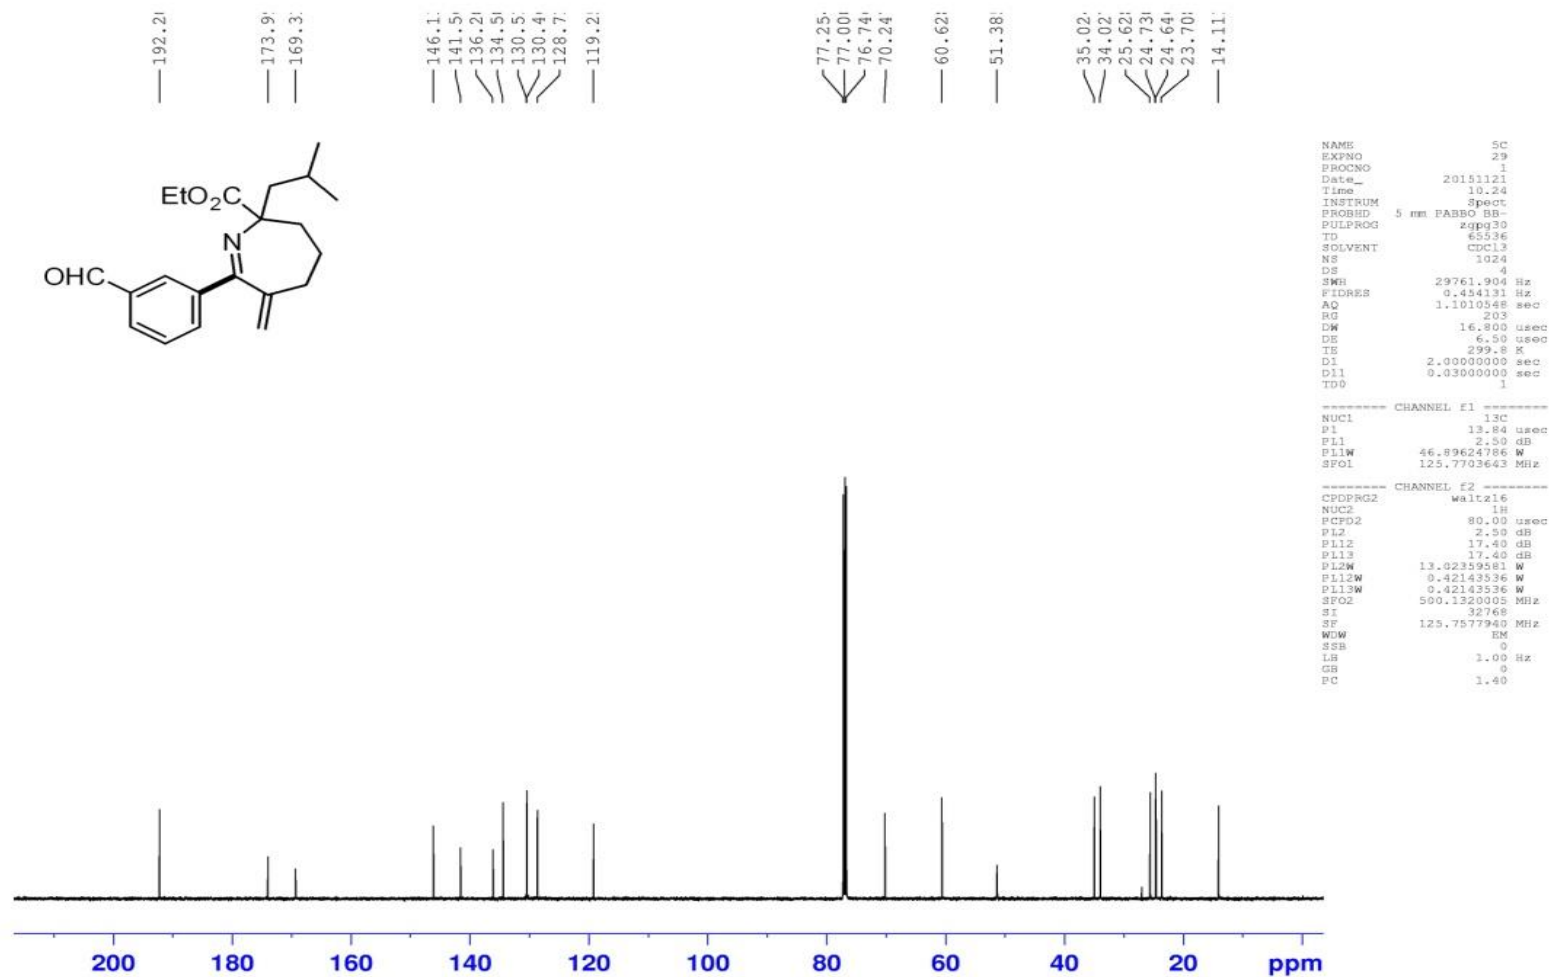

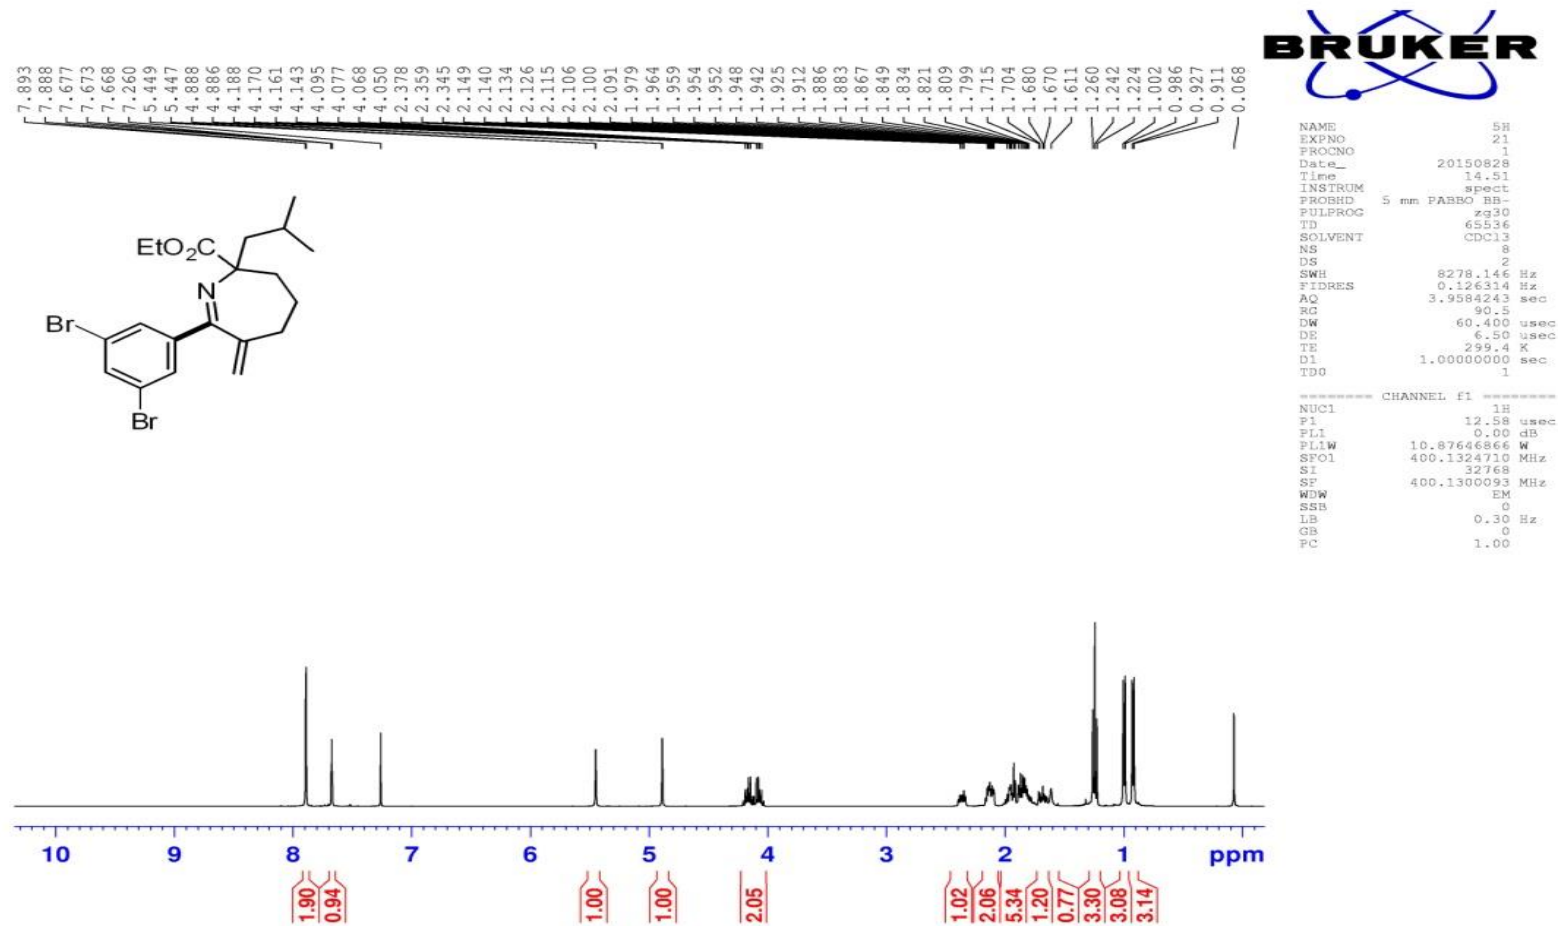

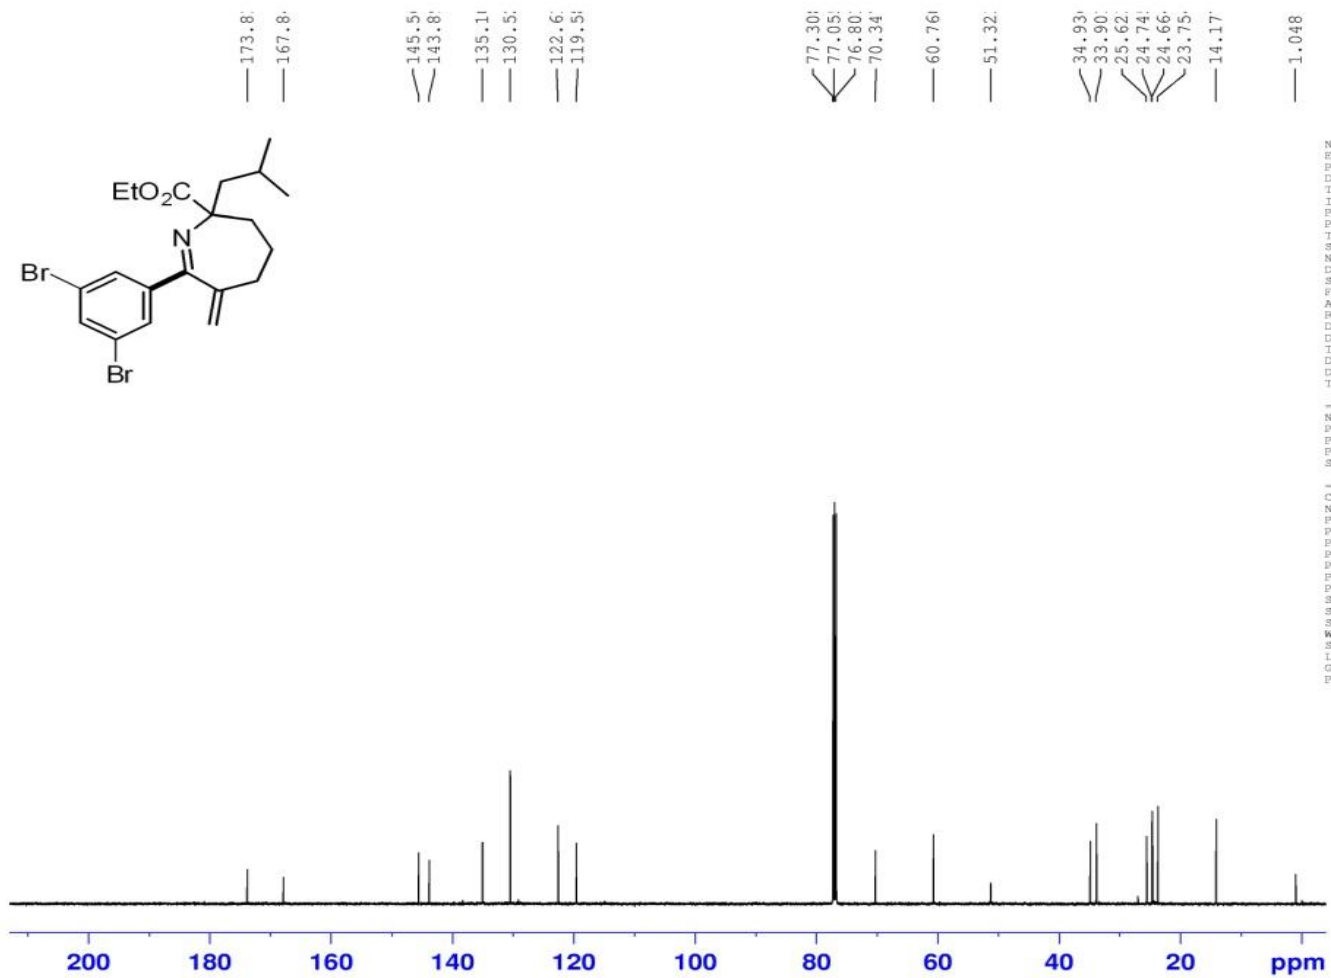

```

NAME          5C
EXPNO         100
PROCNO        1
Date_         20151226
Time          17.08
INSTRUM       Spect
PROBHD        5 mm PABBO BB-
PULPROG       zgpg30
TD            65536
SOLVENT       CDCl3
NS            1024
DS            4
SWH           29761.904 Hz
FIDRES        0.454131 Hz
AQ            1.1010548 sec
RG            203
DM           16.800 usec
DE            6.50 usec
TE            294.9 K
D1            2.0000000 sec
D11           0.0300000 sec
TD0           1

===== CHANNEL F1 =====
NUC1           13C
P1            13.84 usec
PL1            2.50 dB
PL1W           46.89624786 W
SF01          125.7703643 MHz

===== CHANNEL F2 =====
CPDPRG2       waltz16
NUC2           1H
PCPD2         80.00 usec
PL2            2.50 dB
PL12           17.40 dB
PL13           17.40 dB
PL2W          13.02359581 W
PL12W          0.42143536 W
PL13W          0.42143536 W
SFO2          500.1320005 MHz
SI            32768
SF            125.7577890 MHz
WDW           EM
SSB            0
LB            1.00 Hz
GB            0
PC            1.40

```

3m

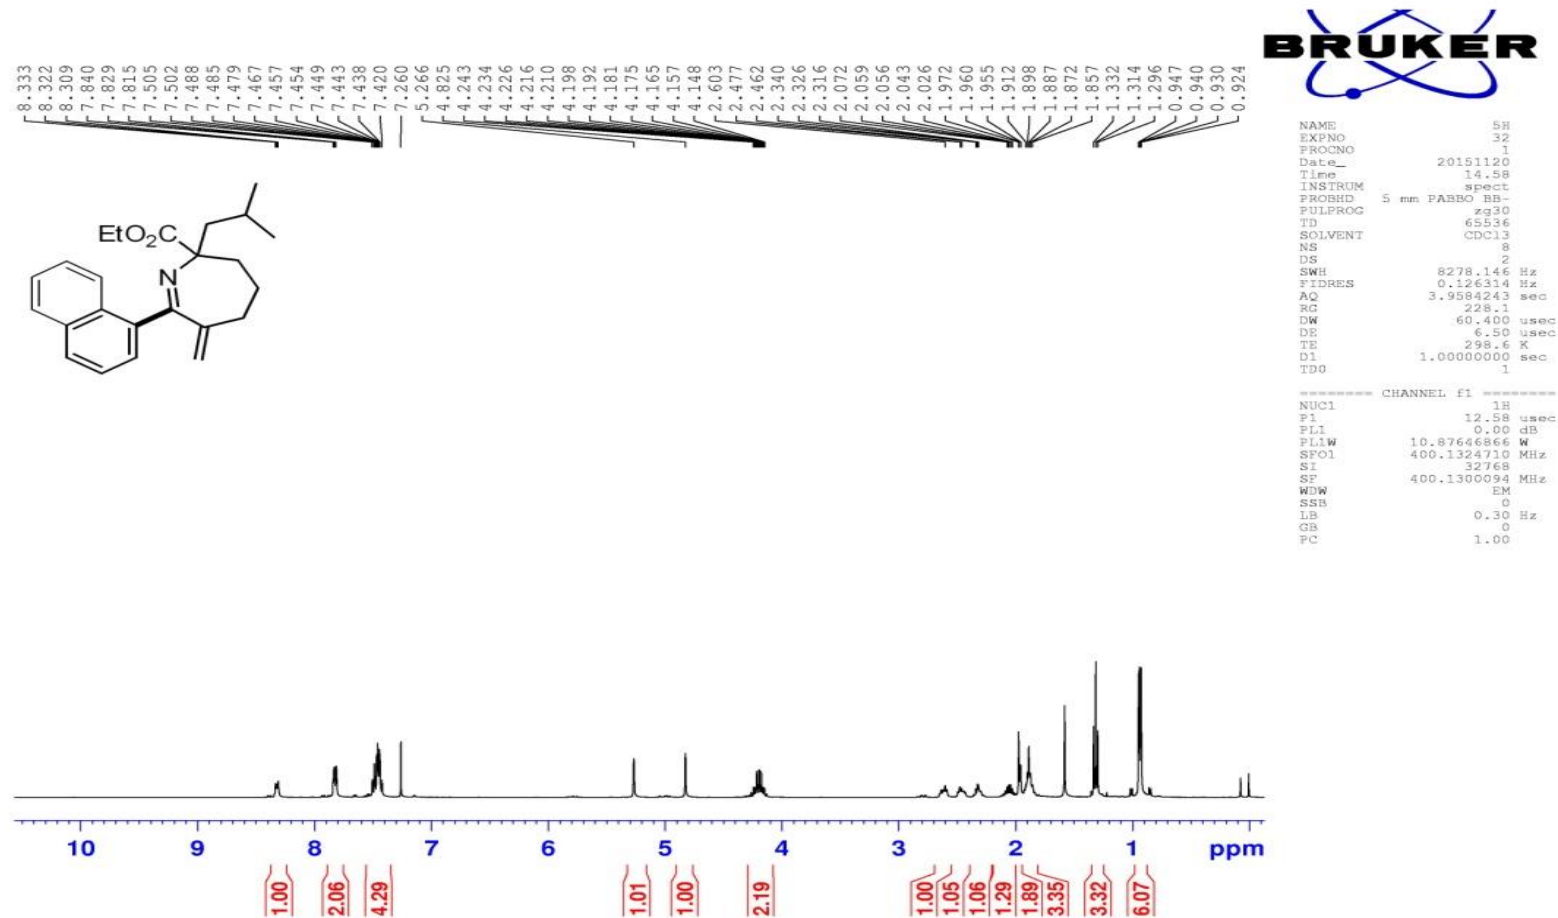

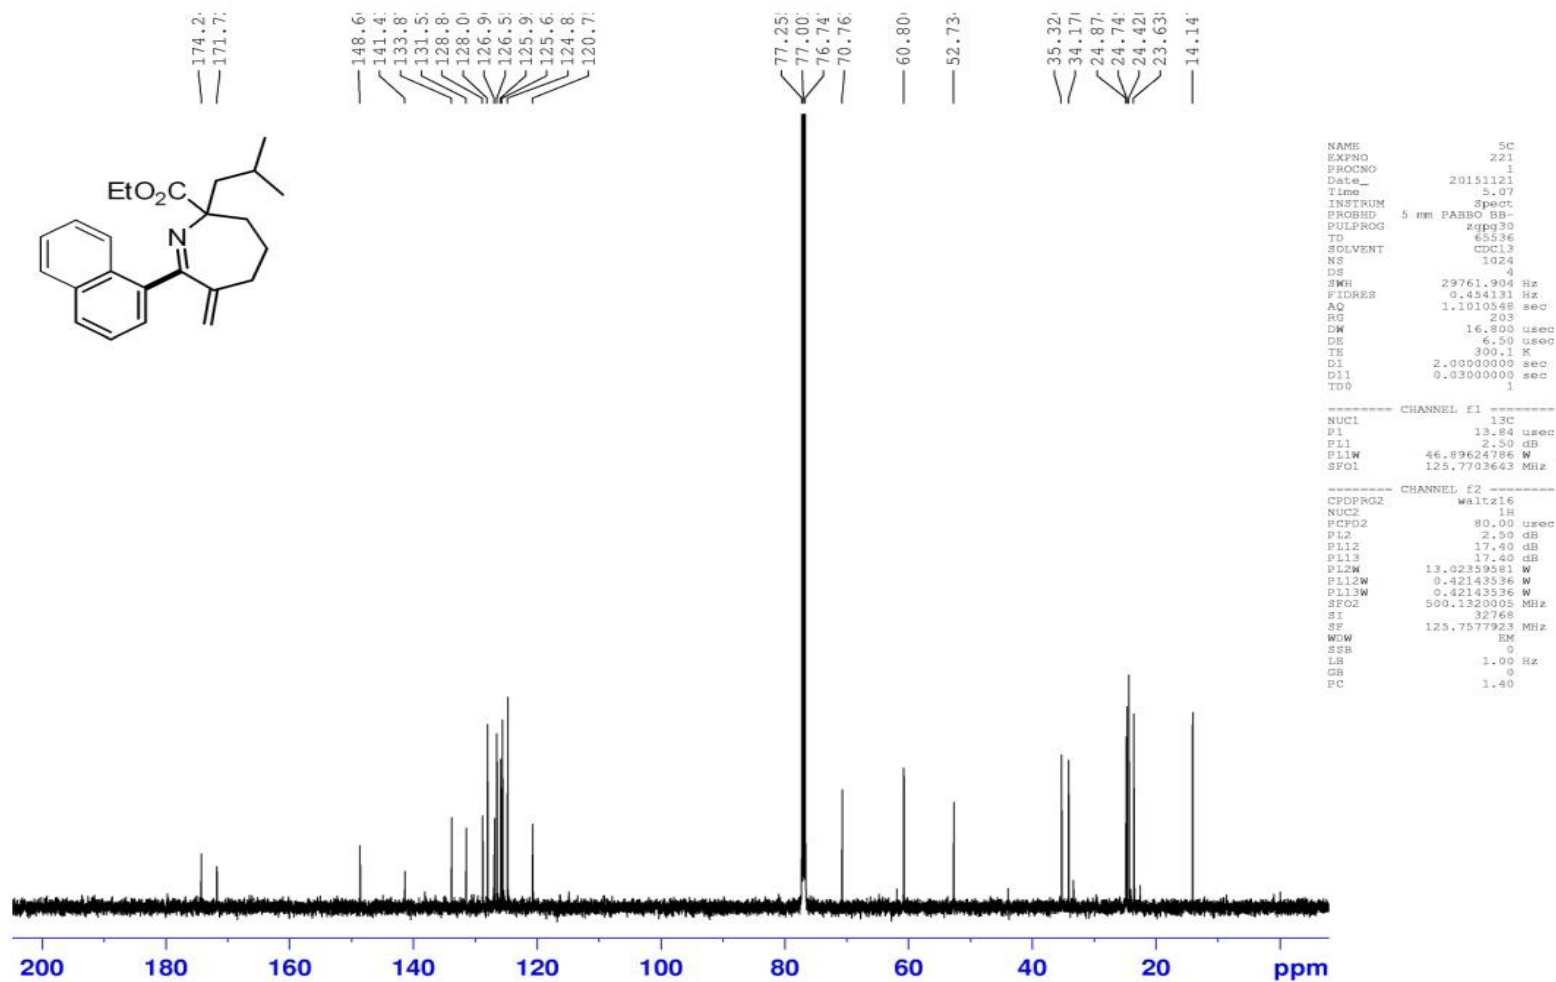

3n

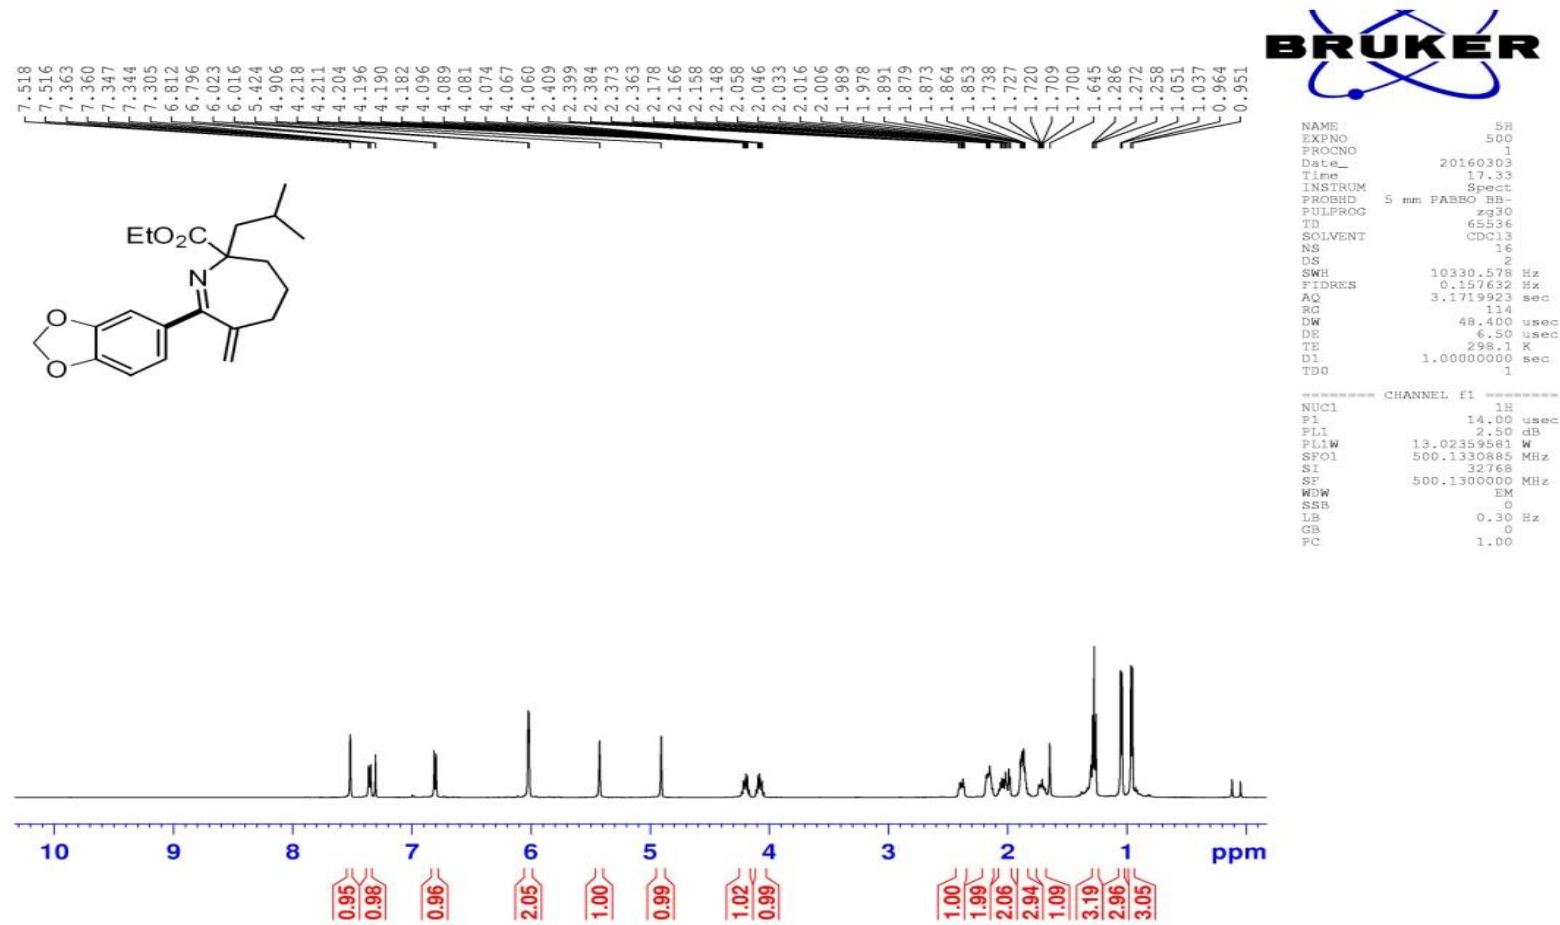

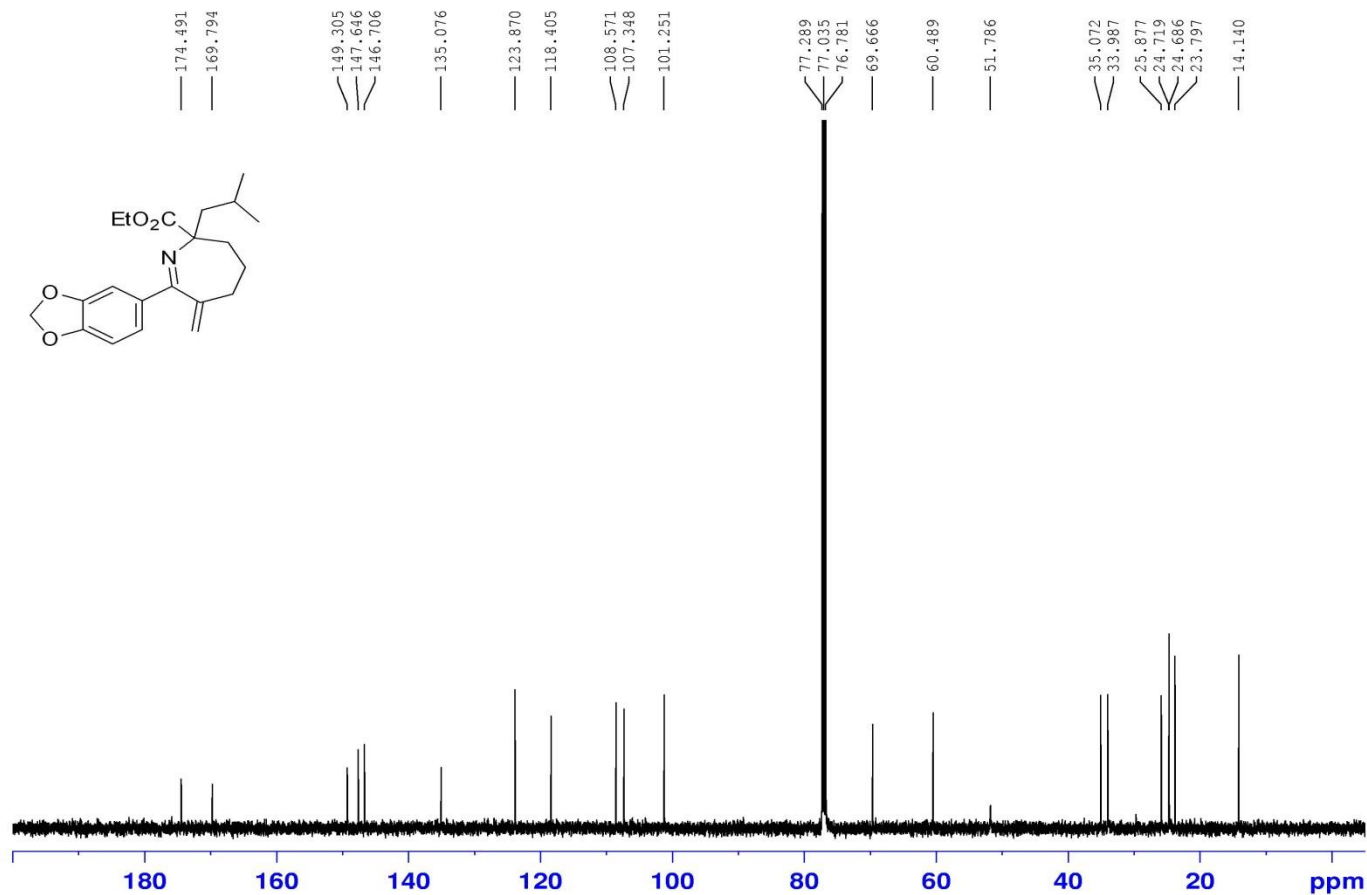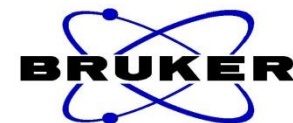

```

NAME          5C
EXPNO         600
PROCNO        1
Date_         20160303
Time          18.02
INSTRUM       Spect
PROBHD        5 mm PABBO BB-
PULPROG       zgpg30
TD            65536
SOLVENT       CDCl3
NS            427
DS            4
SWH           29761.904 Hz
FIDRES        0.454131 Hz
AQ            1.1010548 sec
RG            203
DW            16.800 usec
DE            6.50 usec
TE            298.1 K
D1            2.00000000 sec
D11           0.03000000 sec
TD0           1

===== CHANNEL f1 =====
NUC1           13C
P1            13.84 usec
PL1           2.50 dB
PL1W          46.89624786 W
SFO1          125.7703643 MHz

===== CHANNEL f2 =====
CPDPRG2       waltz16
NUC2           1H
PCPD2         80.00 usec
PL2           2.50 dB
PL12          17.40 dB
PL13          17.40 dB
PL2W          13.02359581 W
PL12W         0.42143536 W
PL13W         0.42143536 W
SFO2          500.1320005 MHz
SI            32768
SF            125.7577890 MHz
WDW           EM
SSB           0
LB            1.00 Hz
GB            0
PC            1.40

```



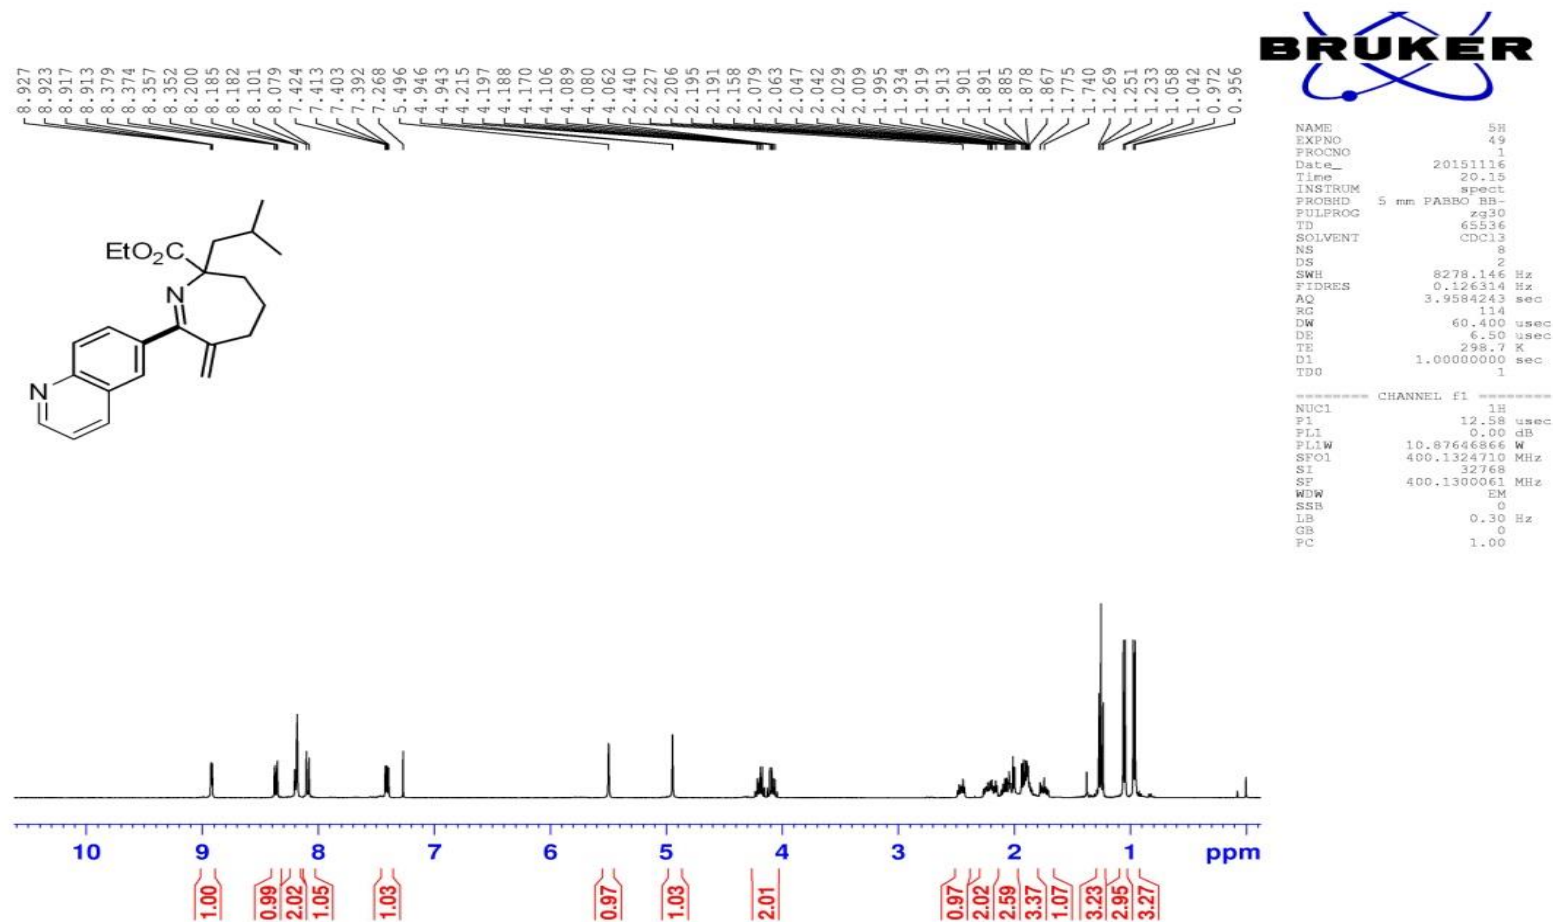

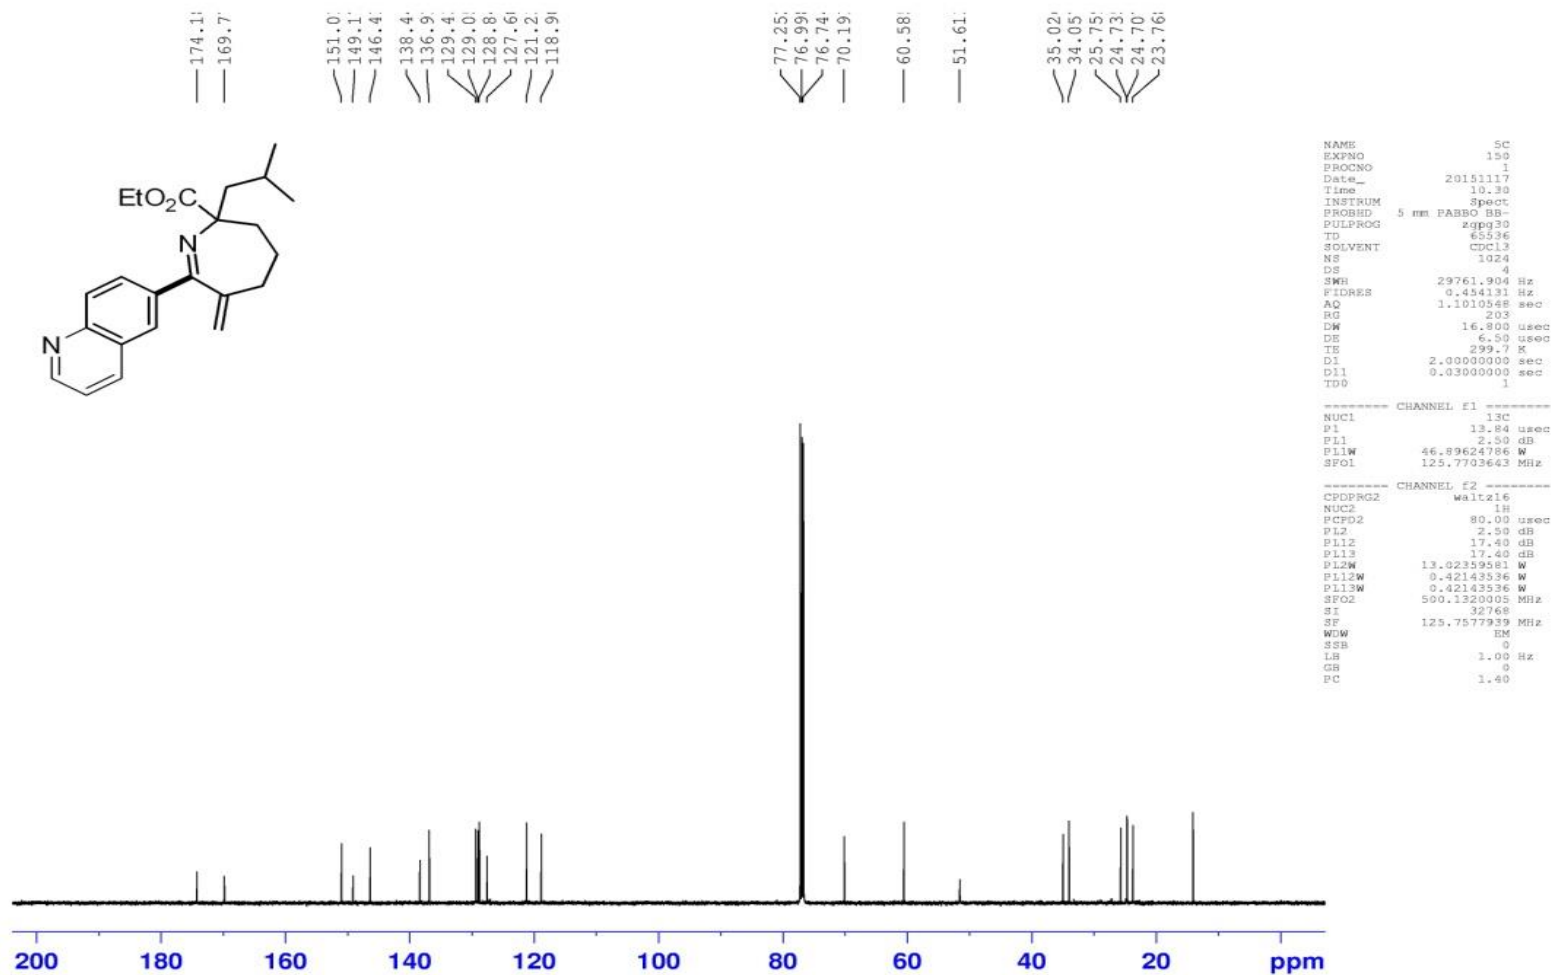

3p

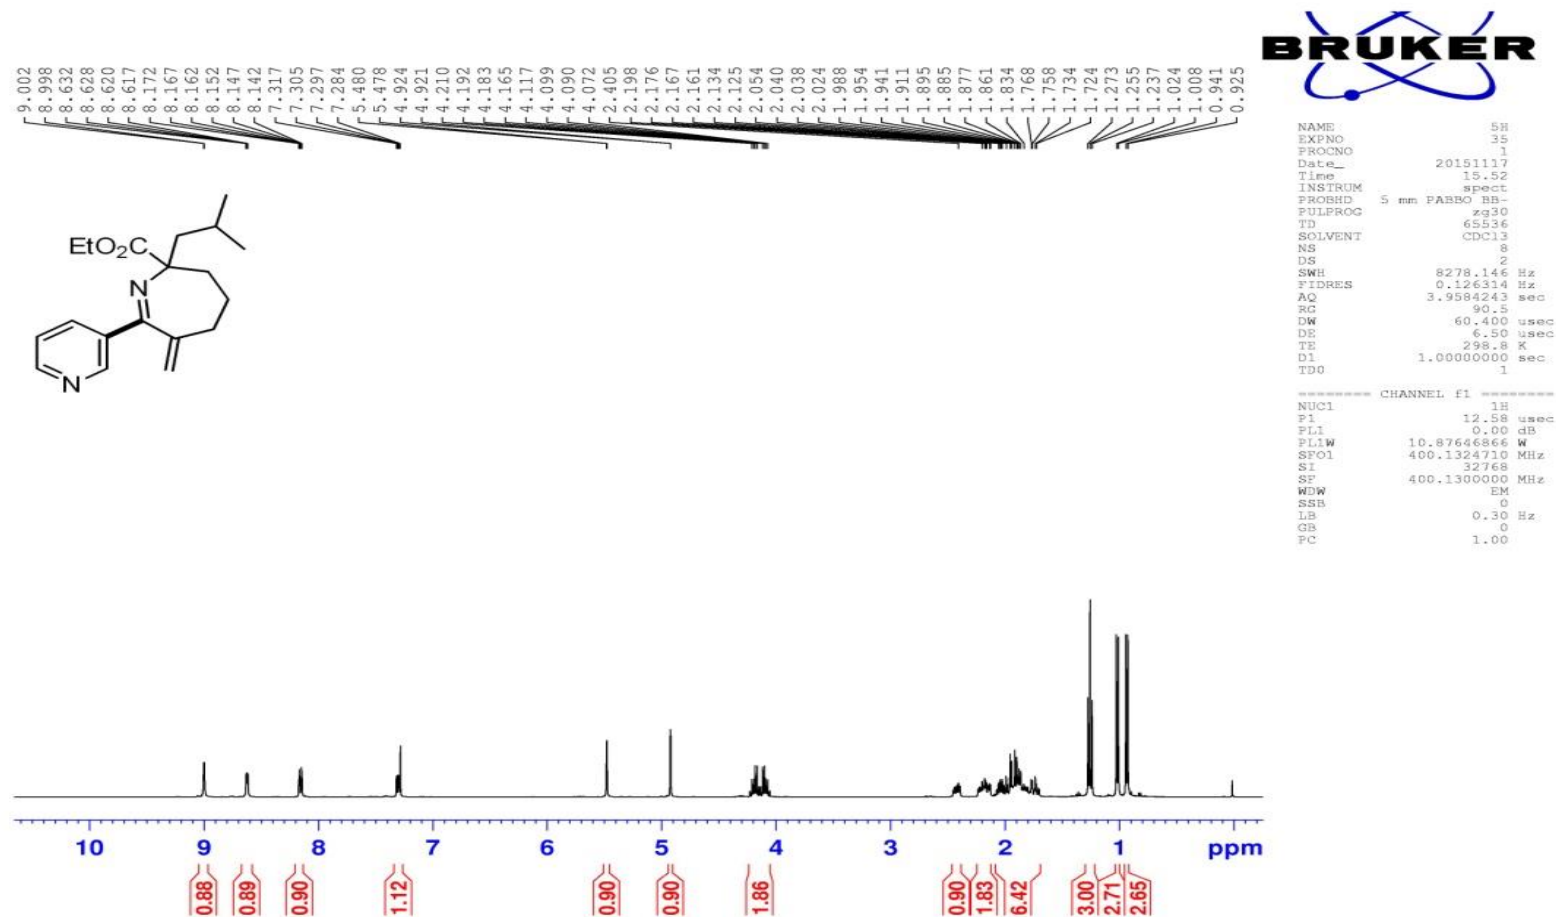

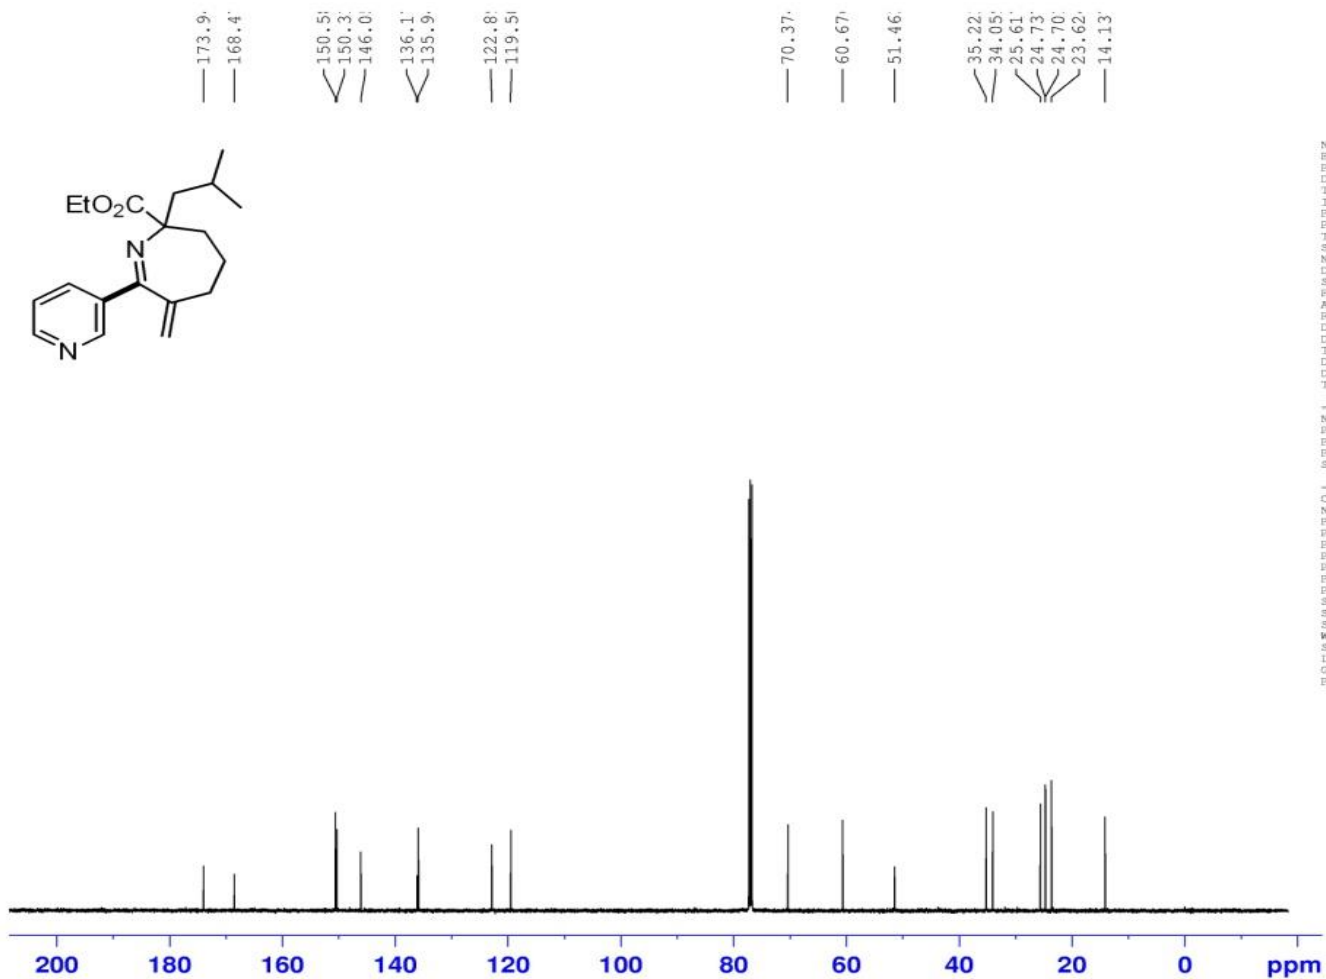

```

NAME          SC
EXPNO         99
PROCNO        1
Date_         20151118
Time          8.21
INSTRUM       spect
PROBHD        5 mm PABBO BB-
PULPROG       zgpg30
TD            65536
SOLVENT       CDCl3
NS            1024
DS            4
SWH           29761.904 Hz
FIDRES        0.454131 Hz
AQ            1.1010548 sec
RG            203
DW            16.800 usec
DE            6.50 usec
TE            300.1 K
D1            2.0000000 sec
D11           0.0300000 sec
TD0           1

----- CHANNEL f1 -----
NUC1          13C
P1            13.84 usec
PL1           2.50 dB
PL1W          46.89624786 W
SFO1          125.7703643 MHz

----- CHANNEL f2 -----
CPDPRG2       waltz16
NUC2          1H
PCPD2         80.00 usec
PL2           2.50 dB
PL12          17.40 dB
PL13          17.40 dB
PL12W         13.02359581 W
PL12W         0.42143536 W
PL13W         0.42143536 W
SFO2          500.1320005 MHz
SI            32768
SF            125.7577890 MHz
WDW           EM
SSB           0
LB            1.00 Hz
GB            0
PC            1.40

```

3q

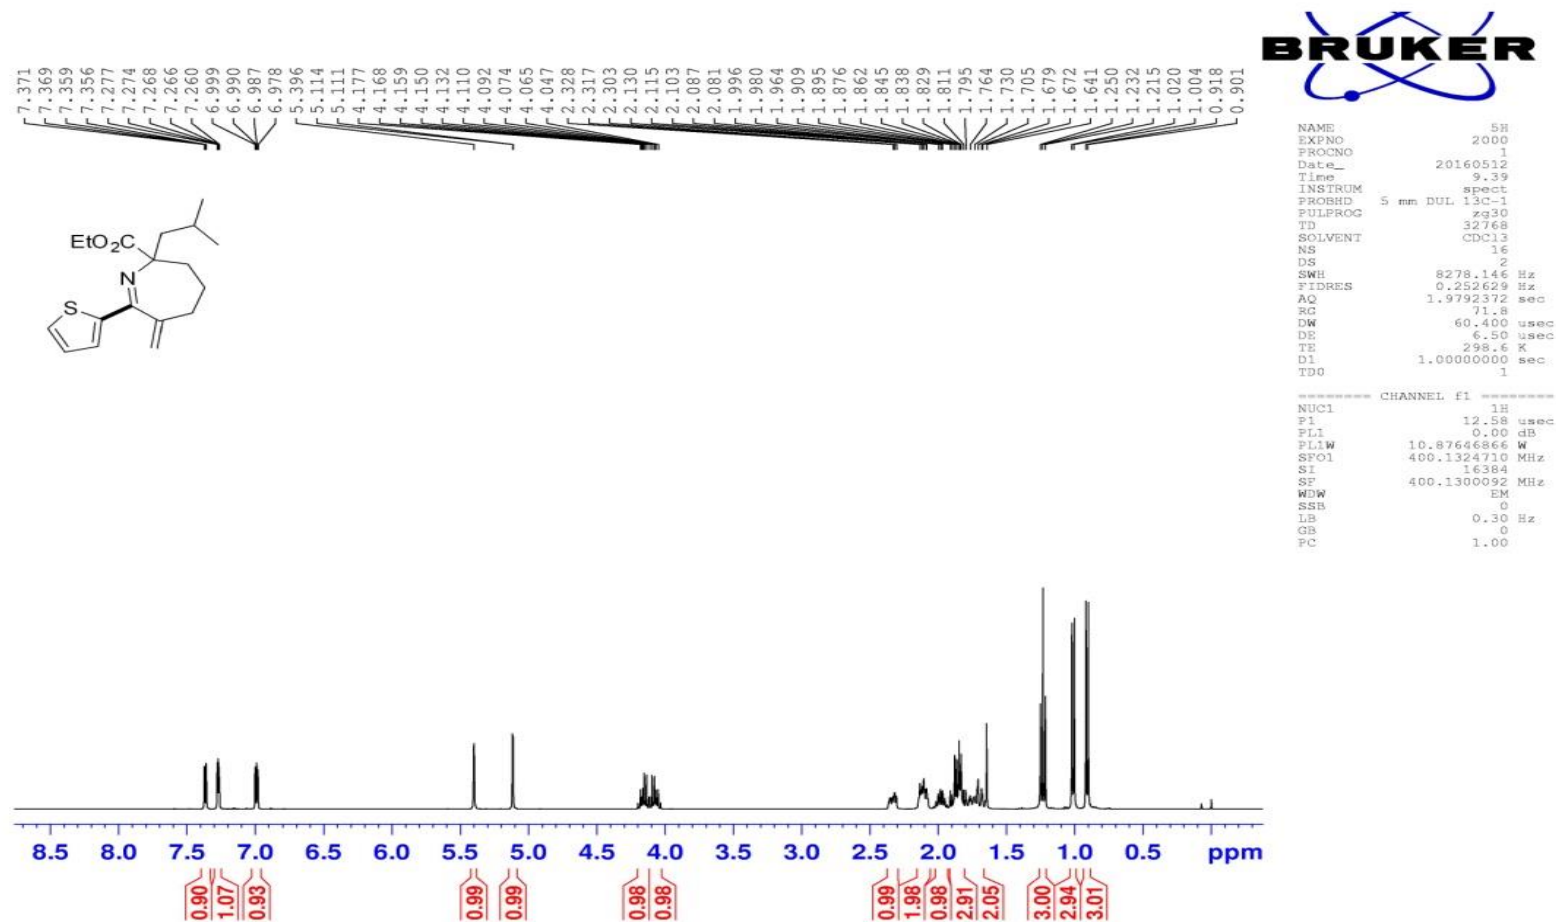

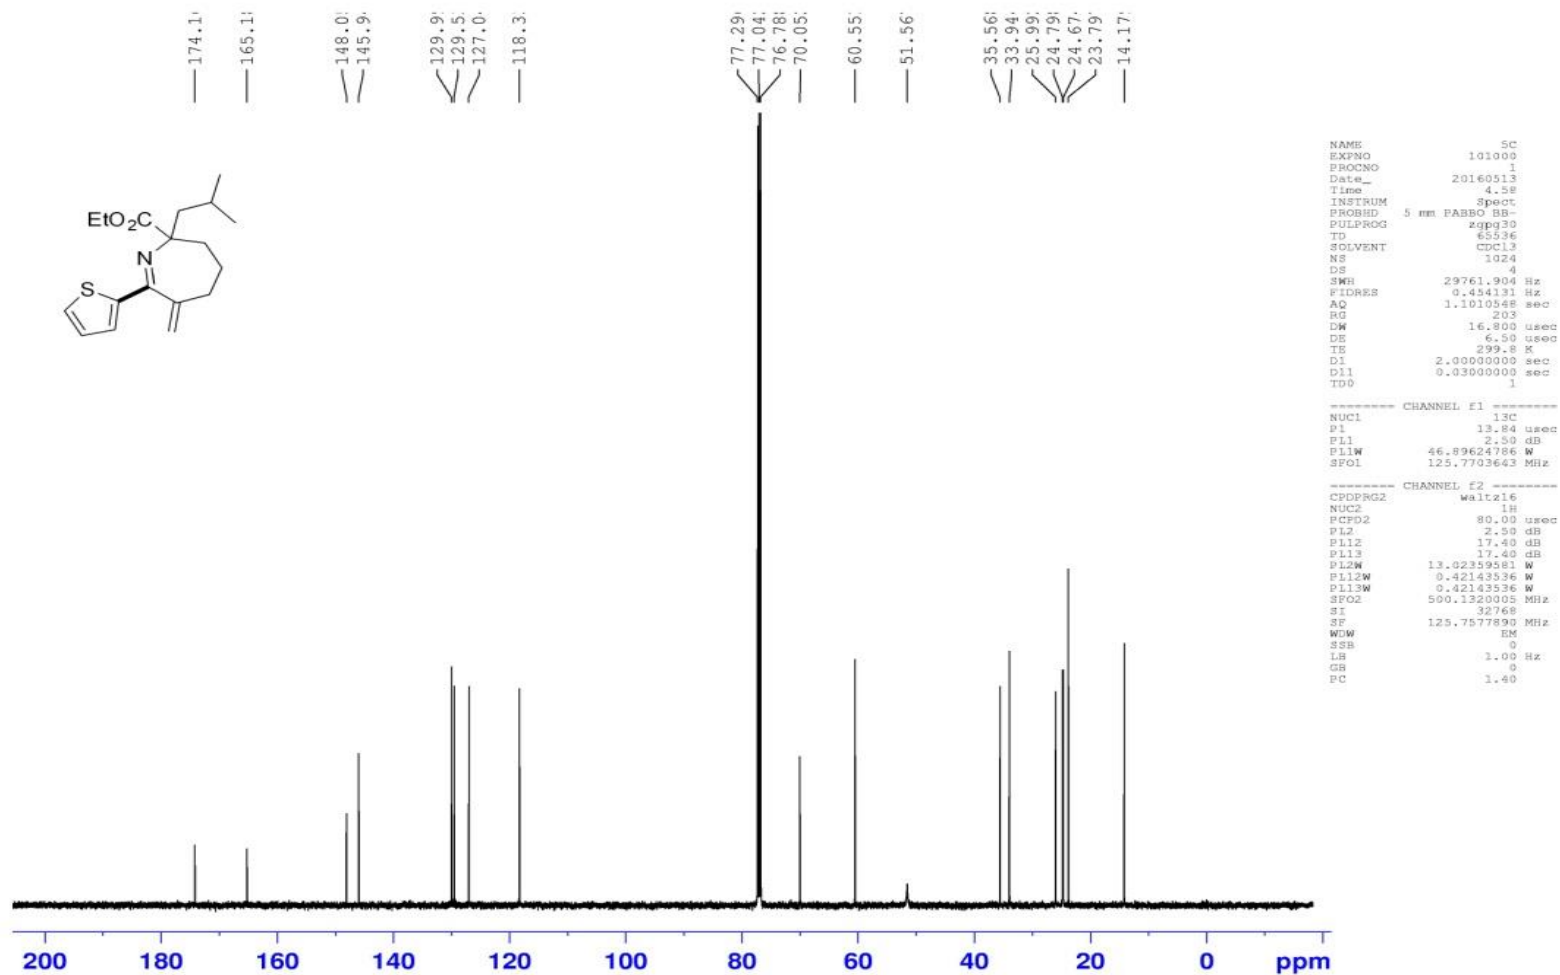

3r

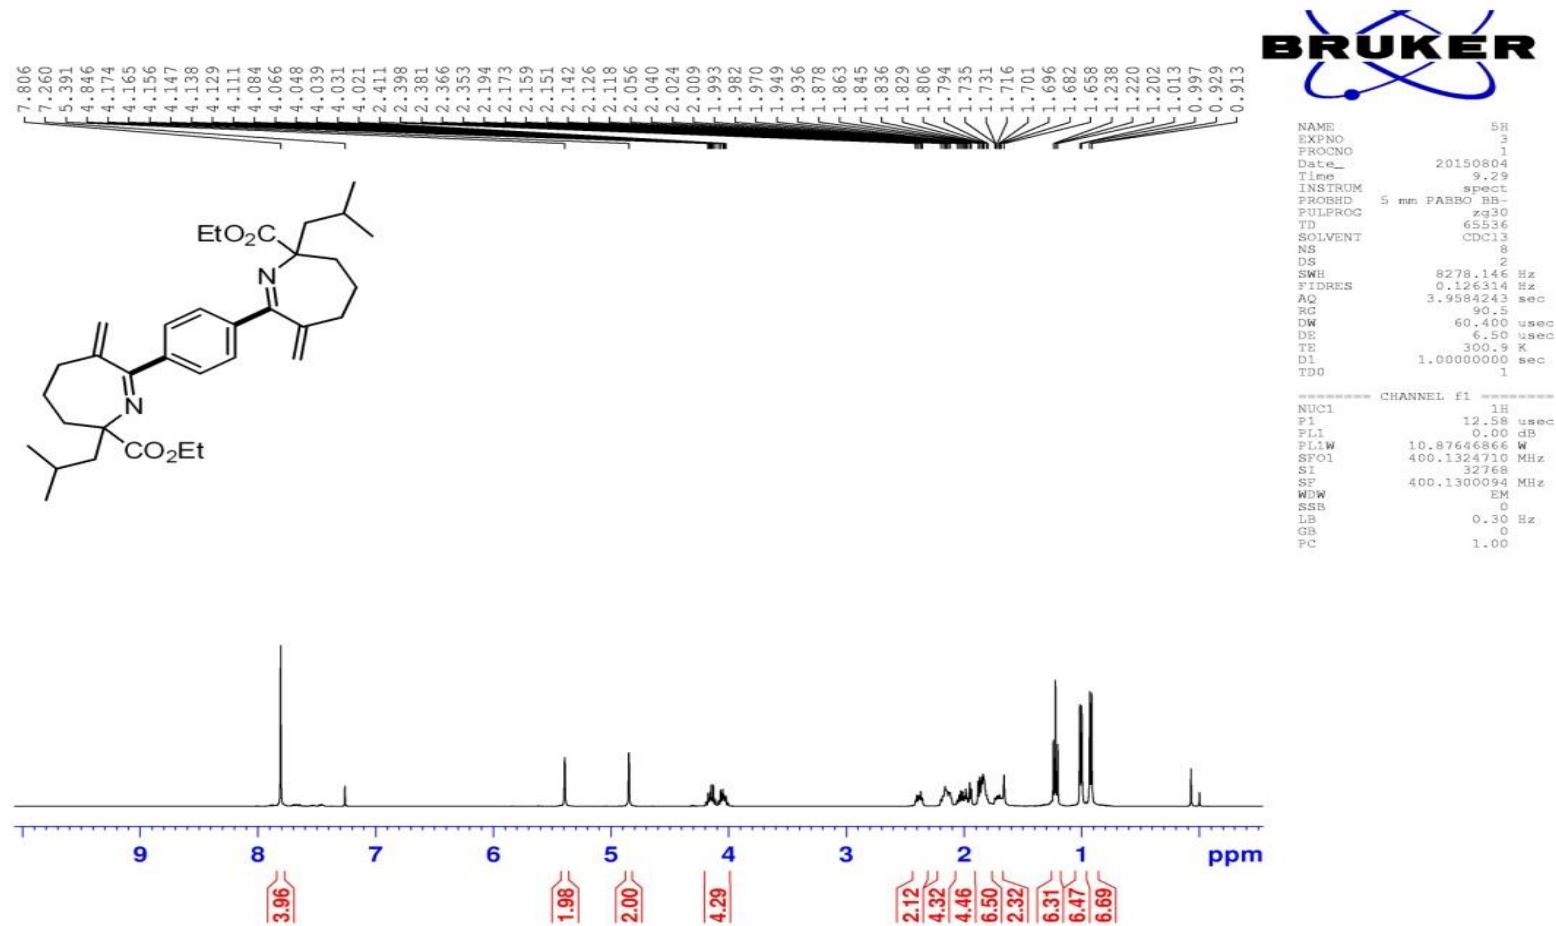

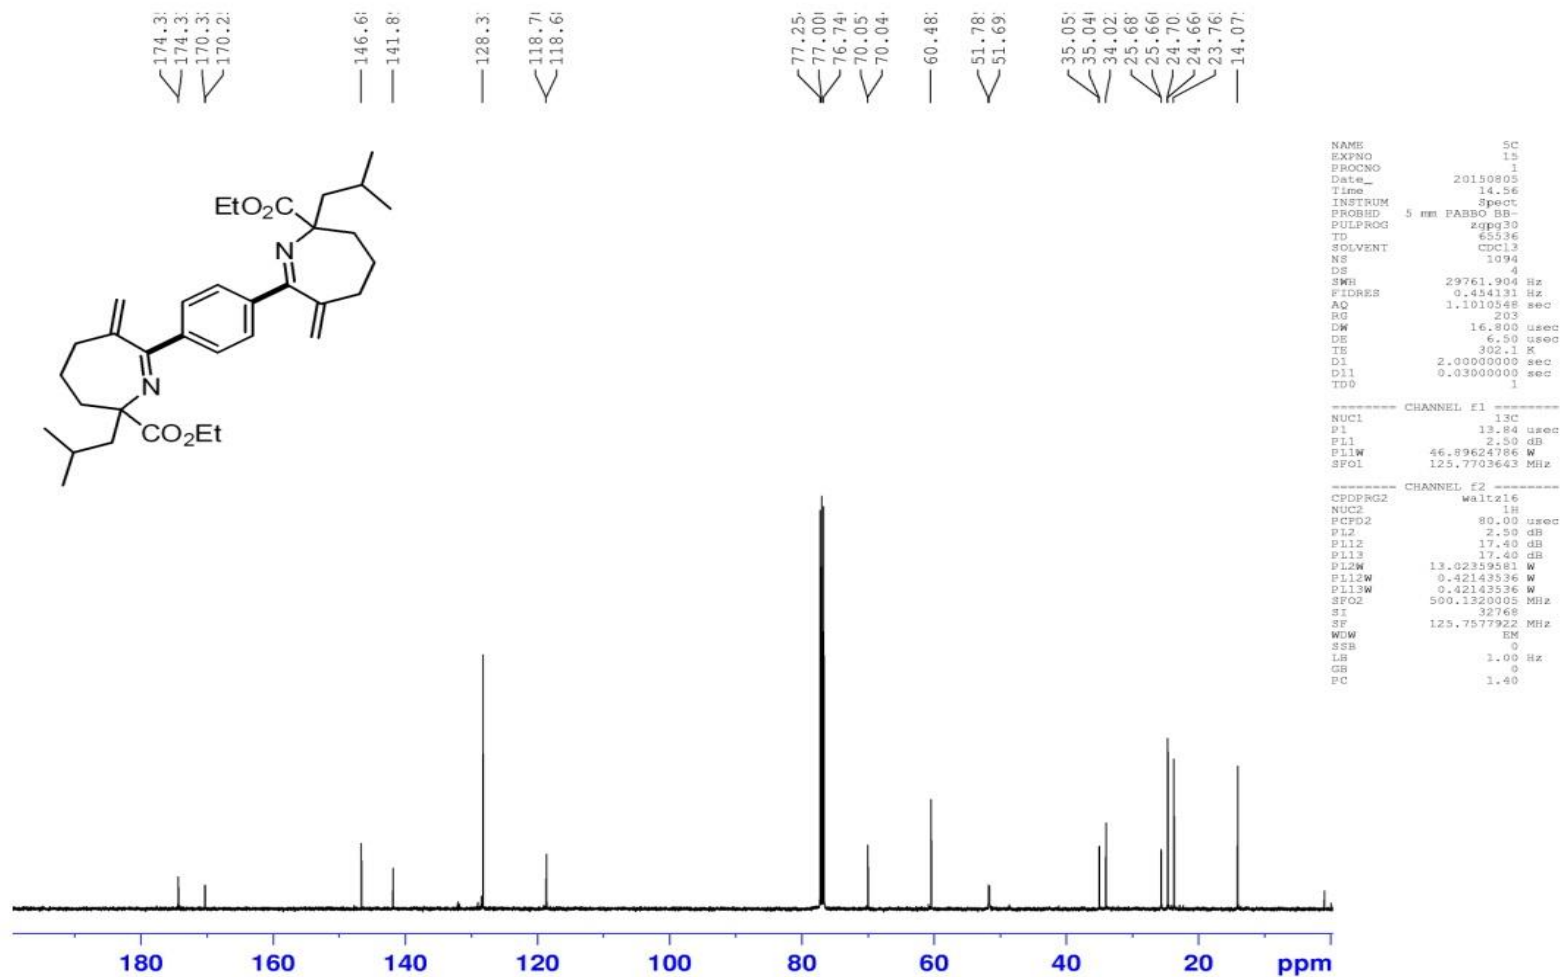



3s

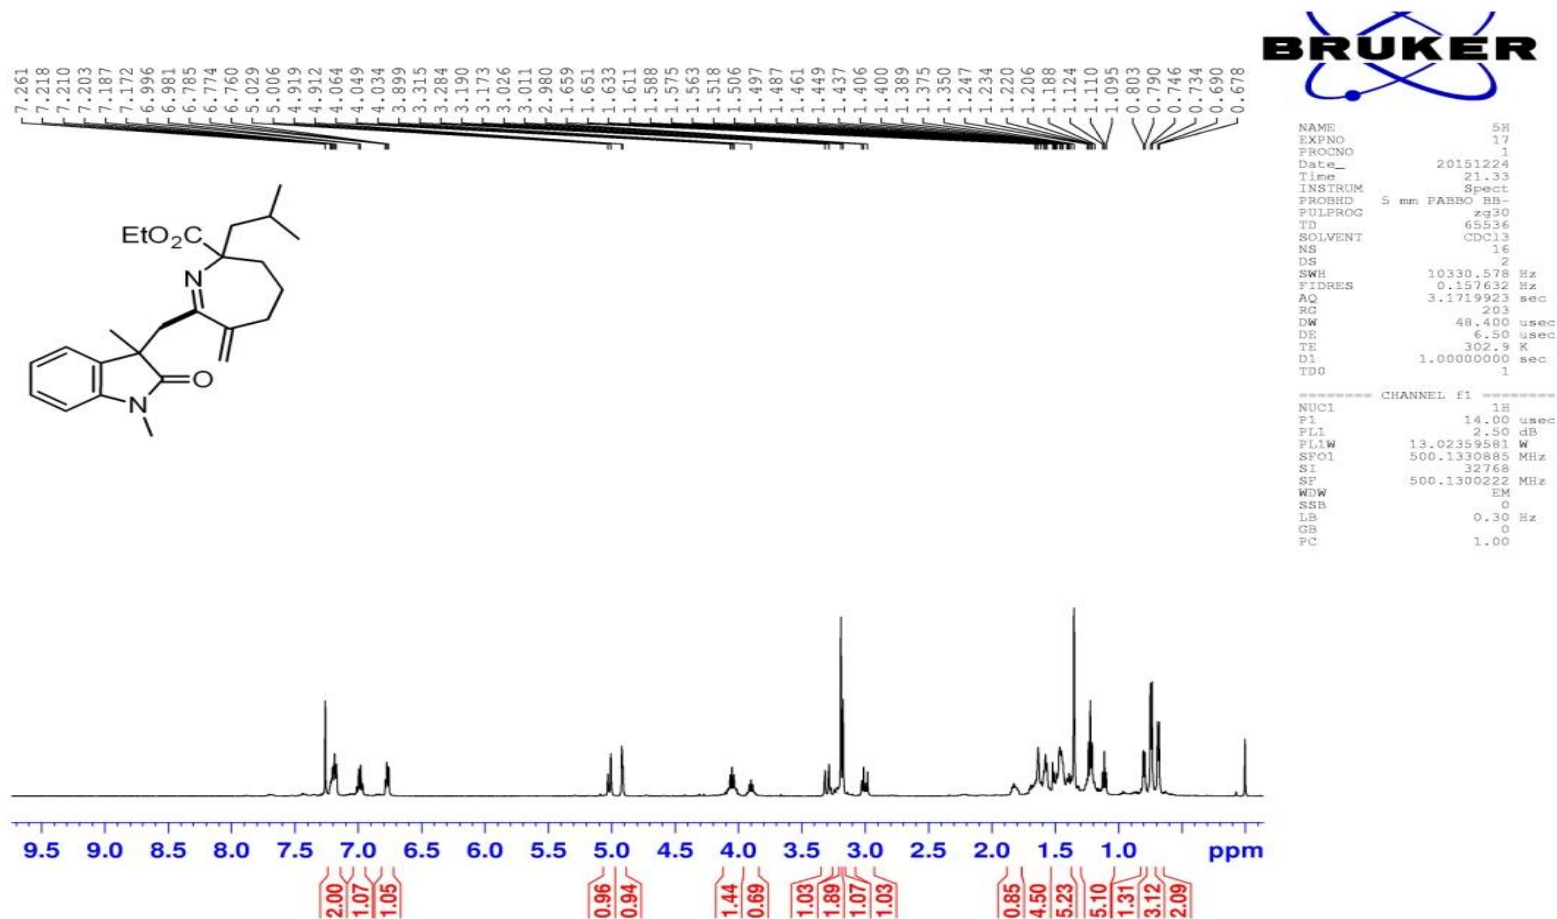

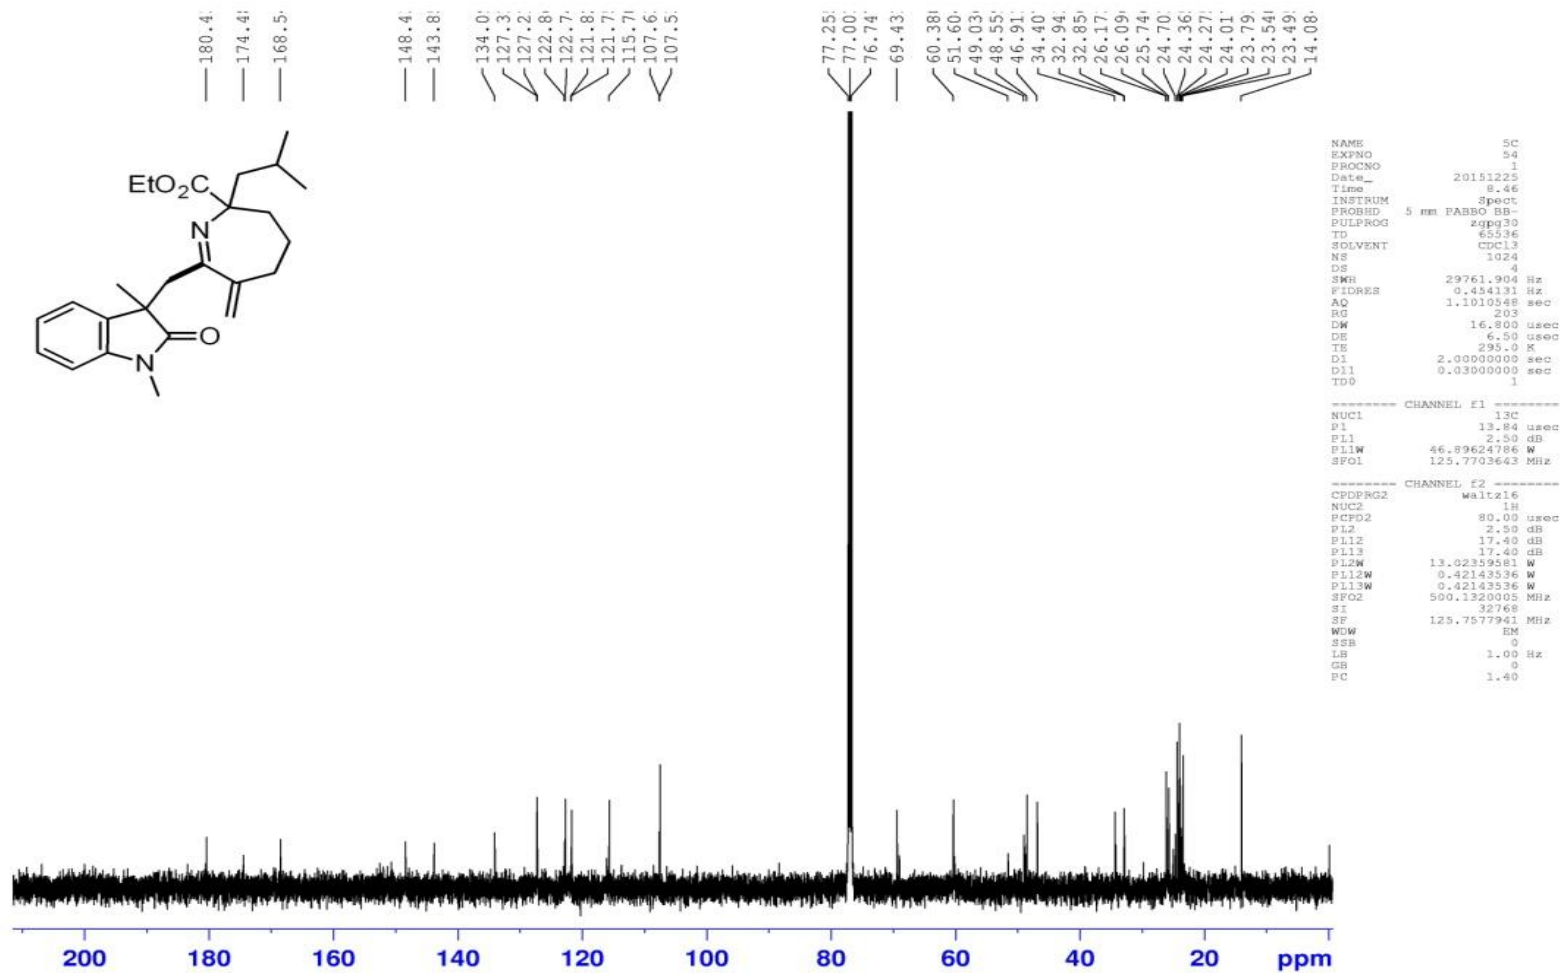

4a

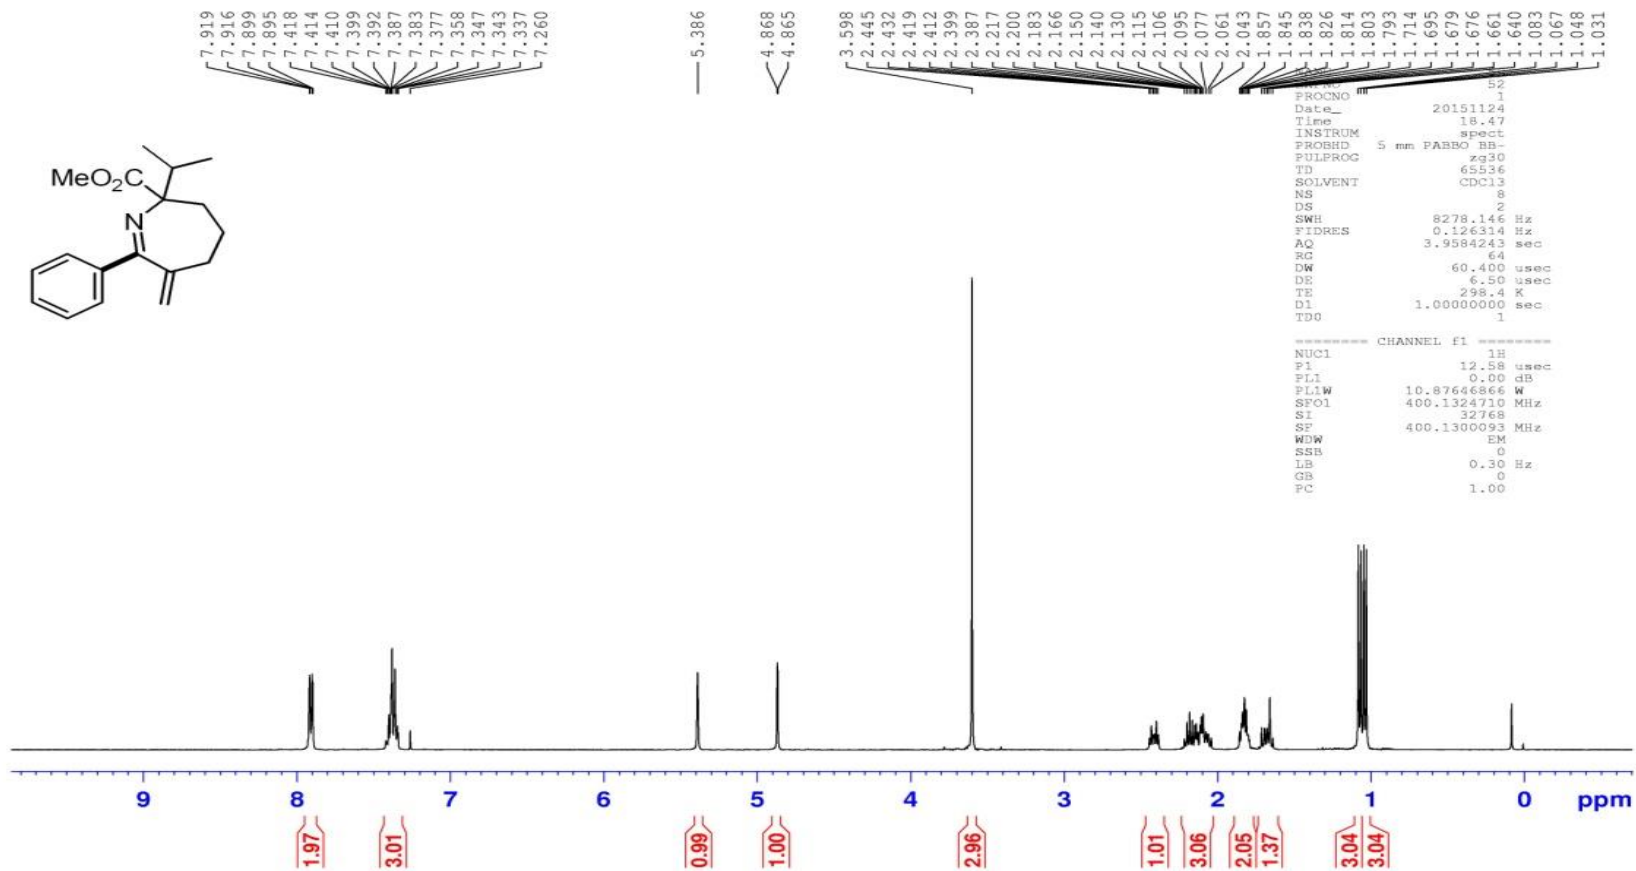

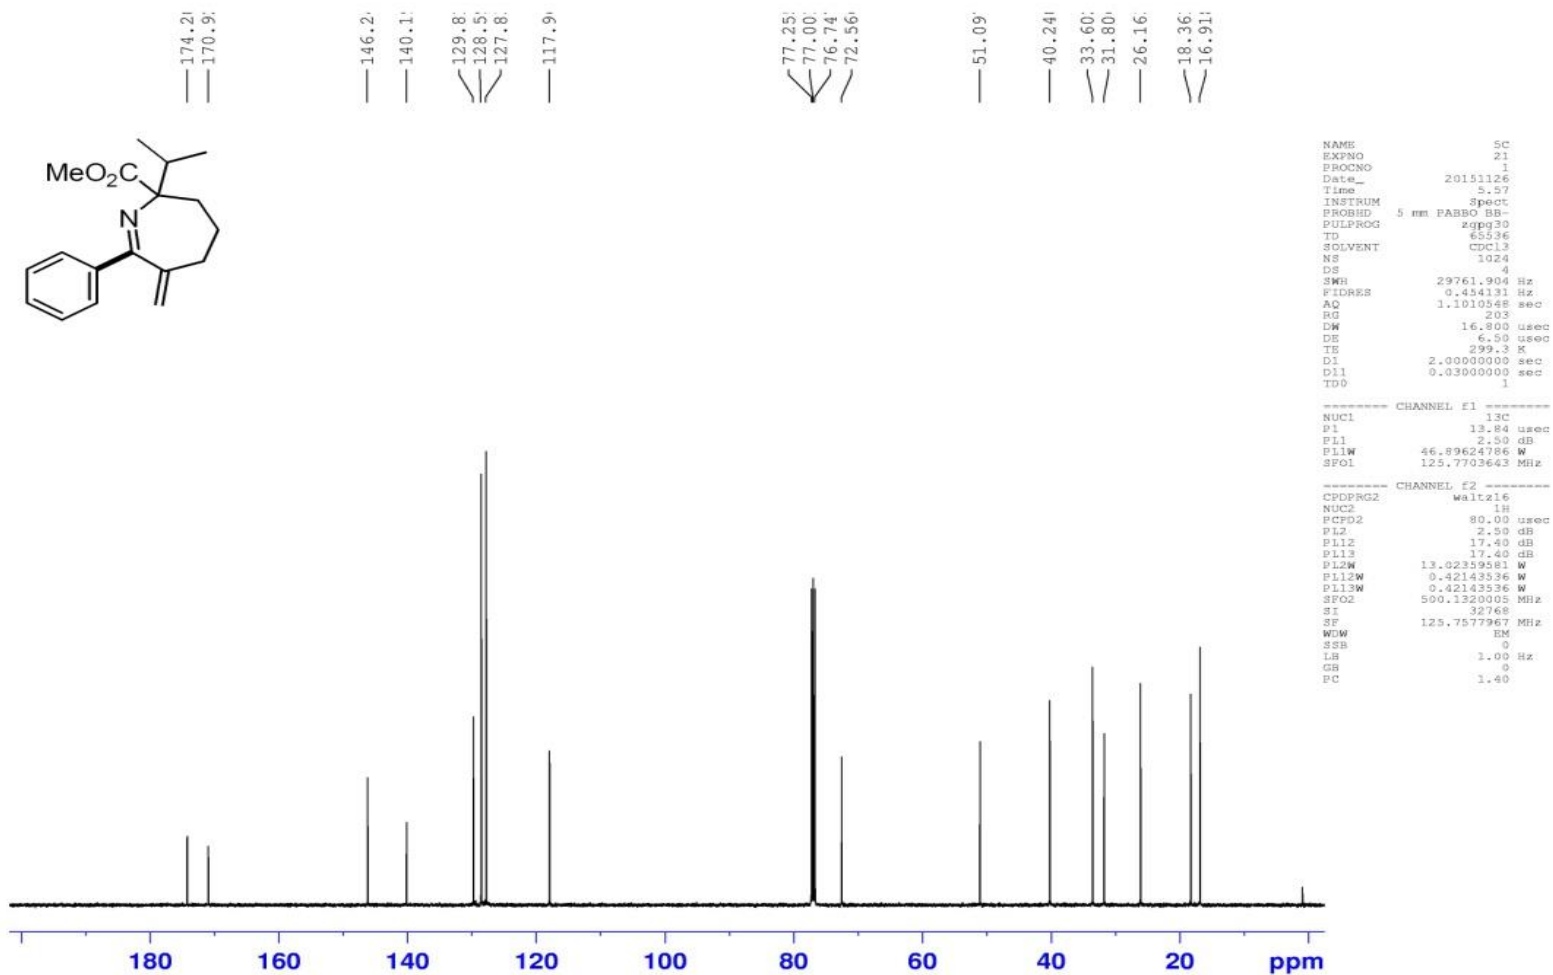

4b

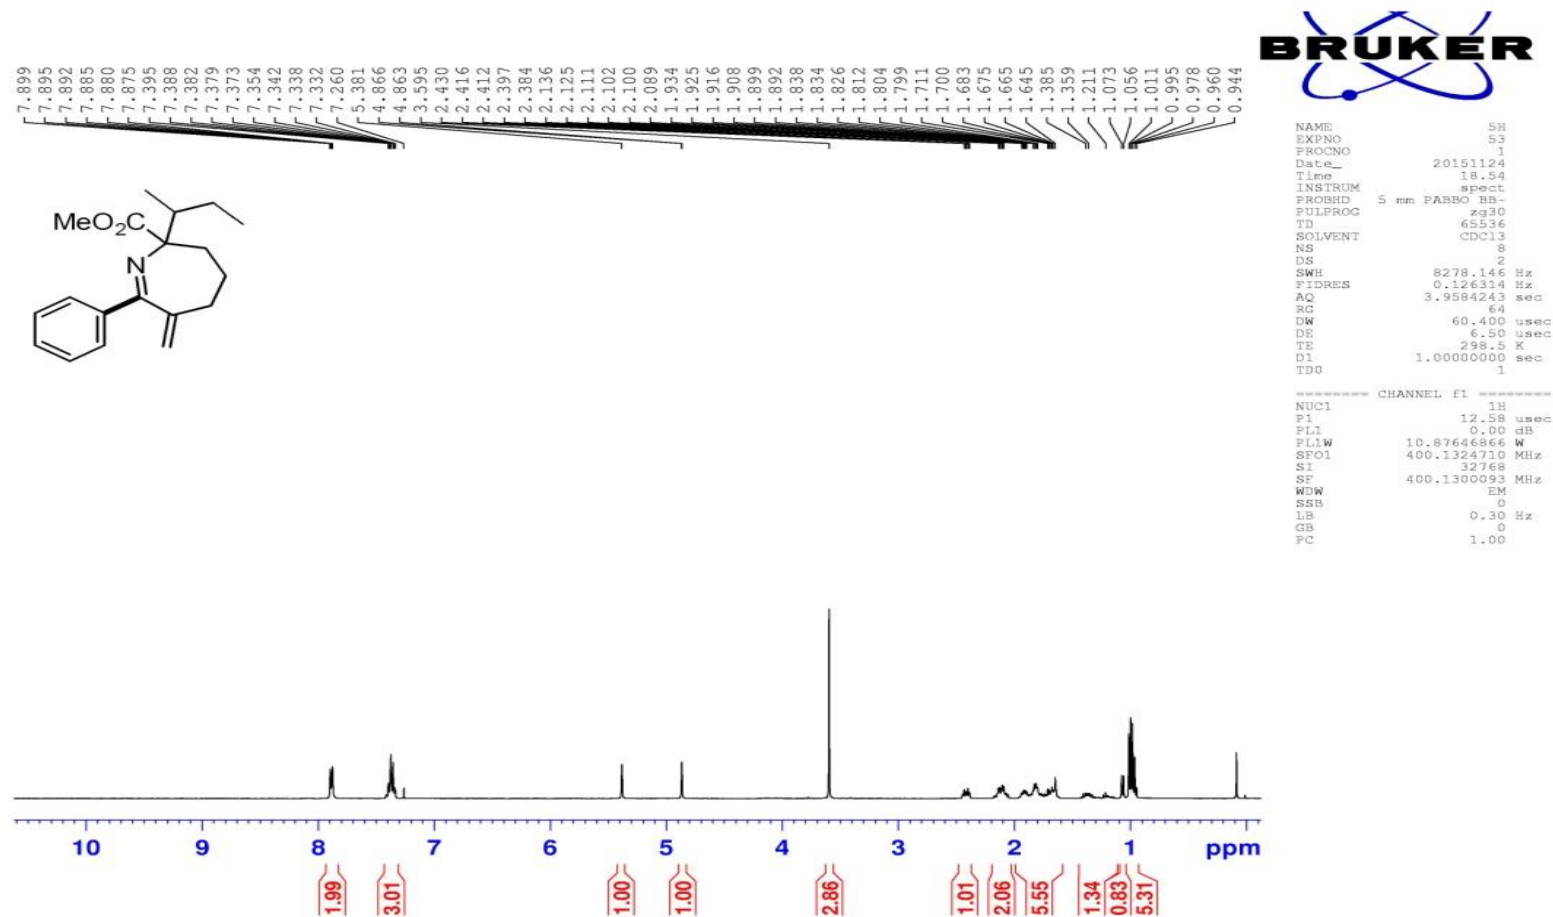

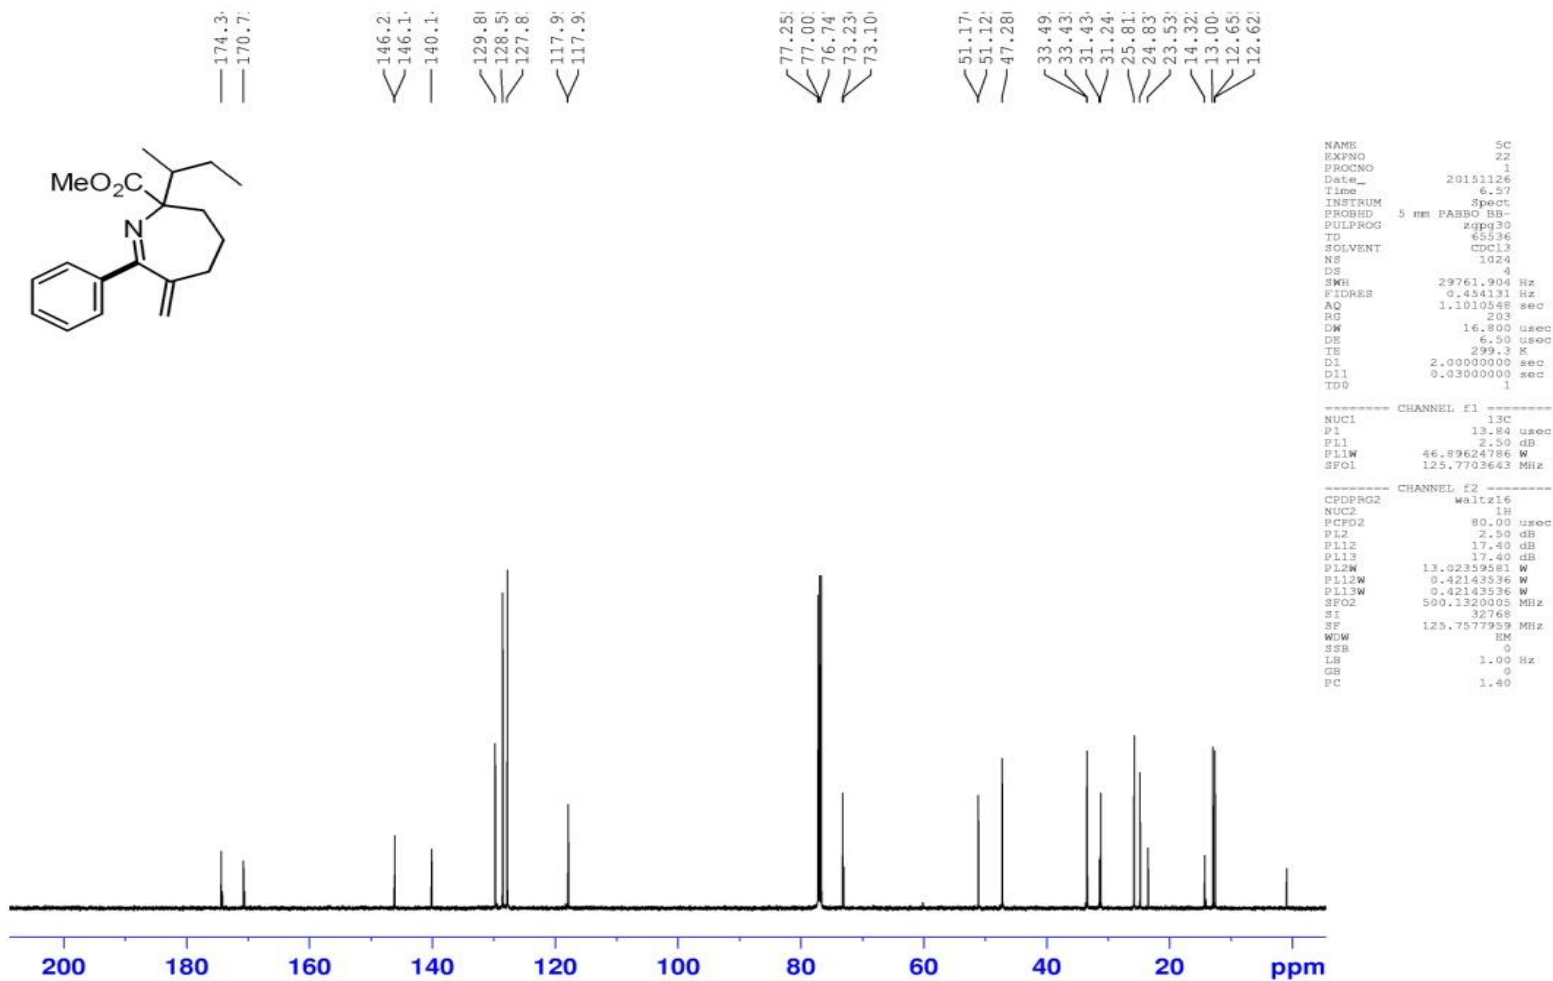

4c

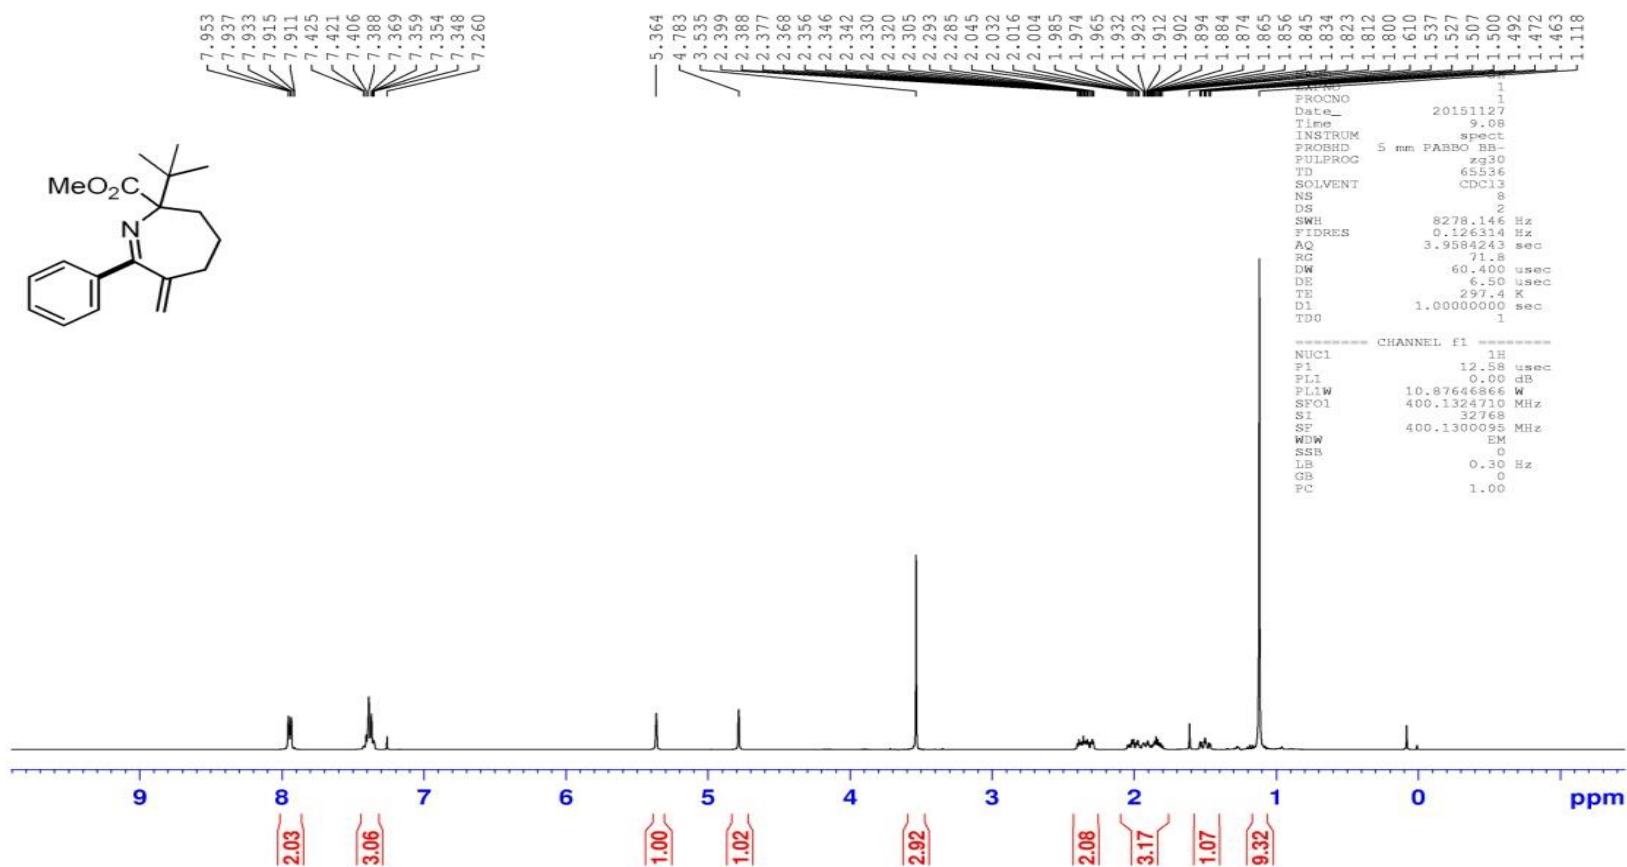

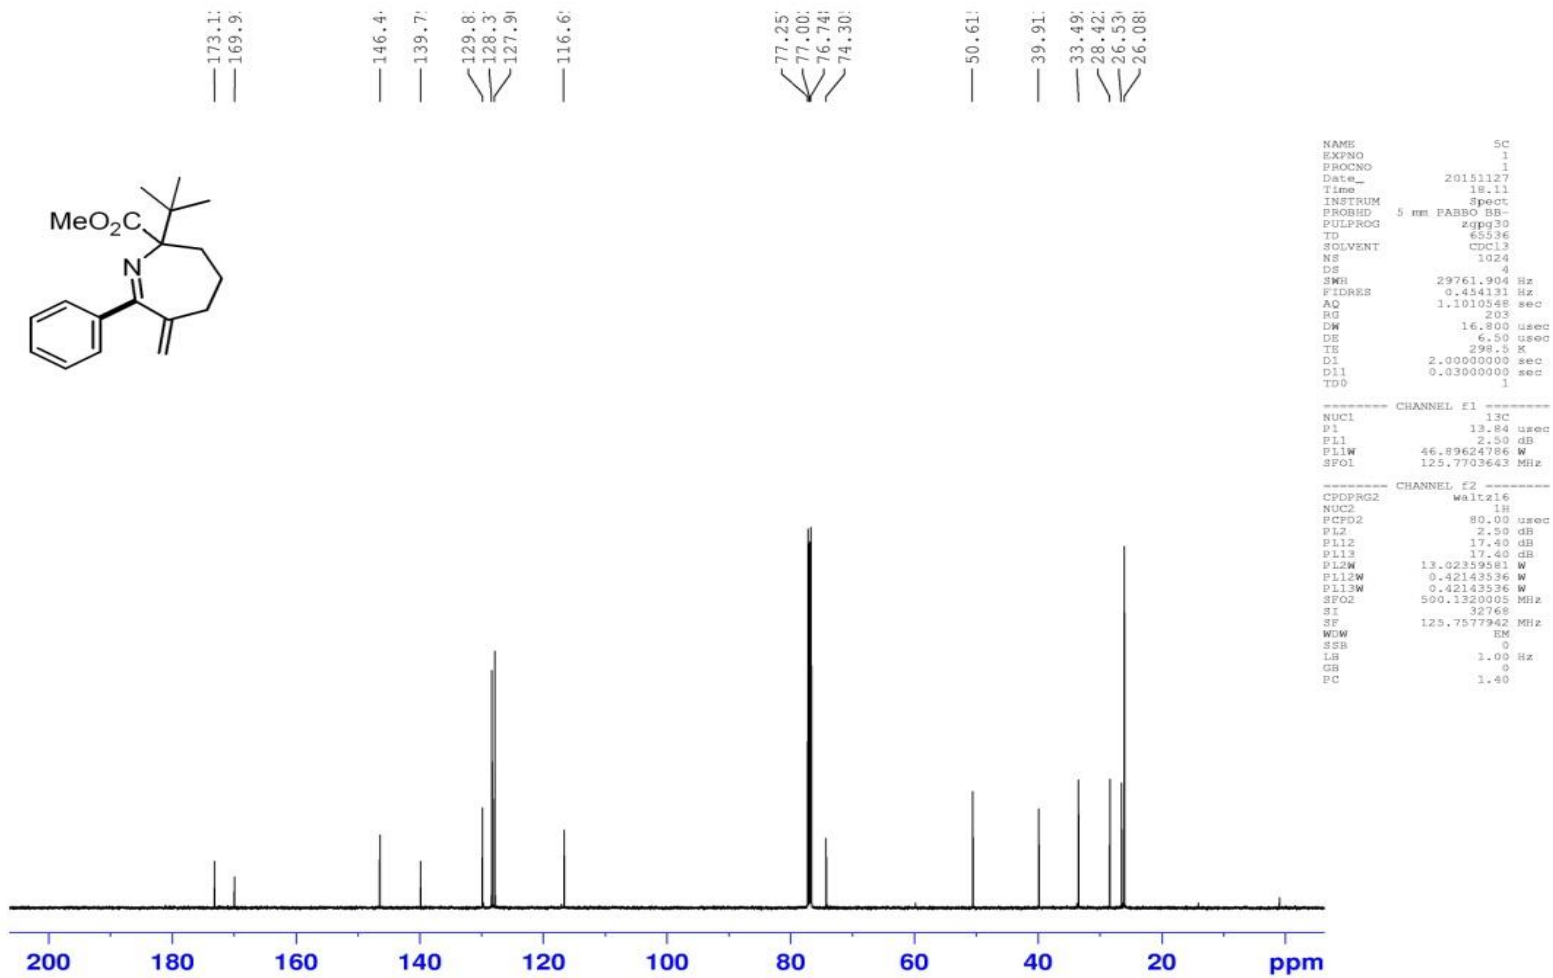



4d

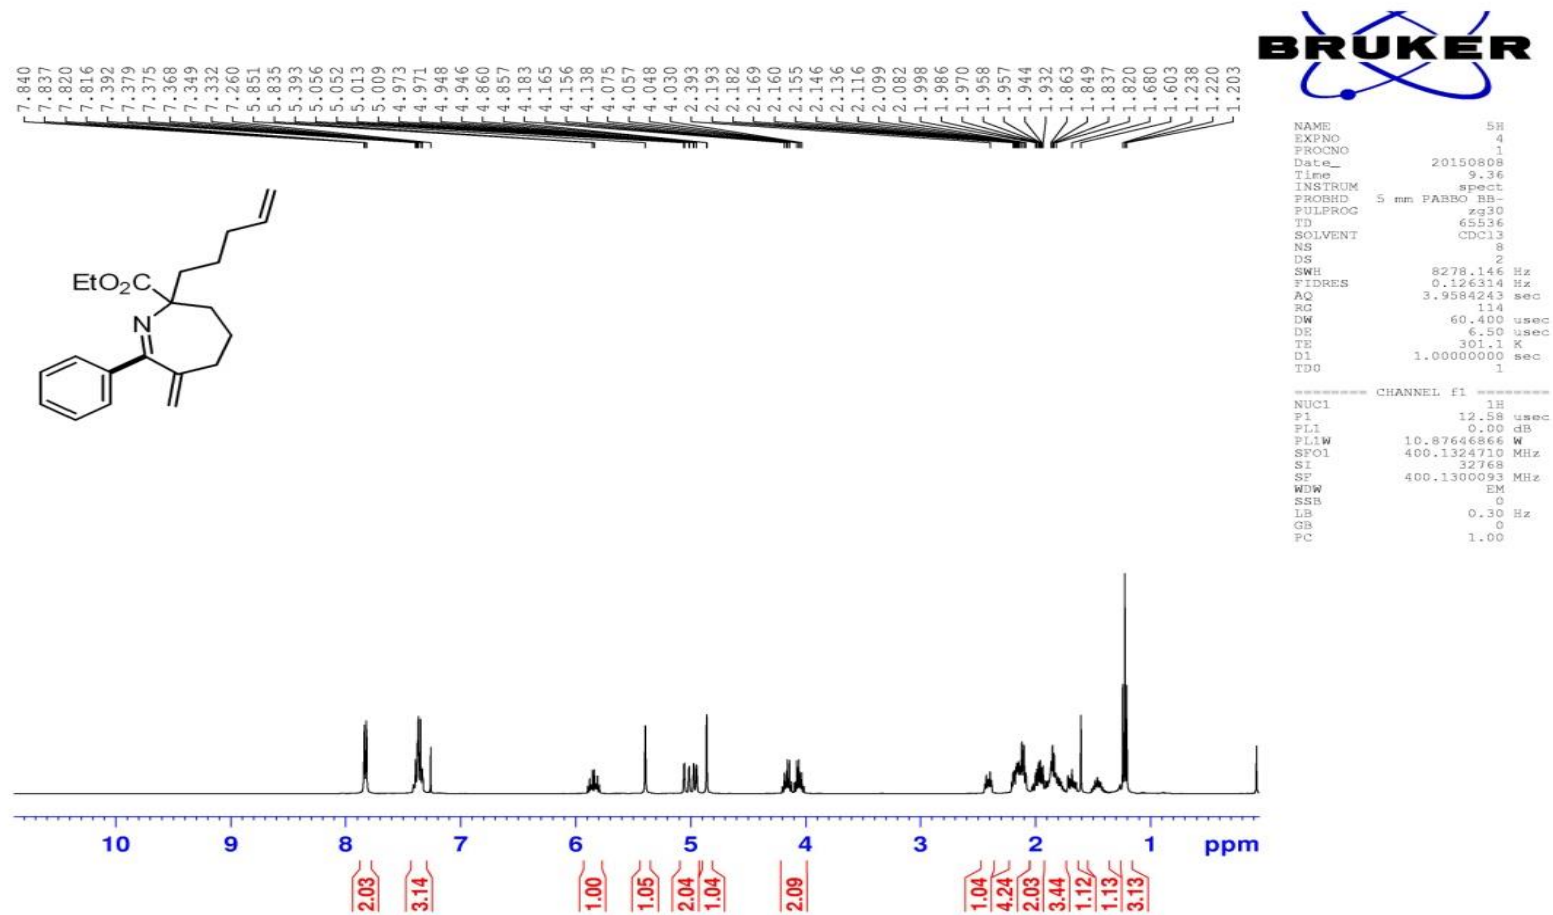

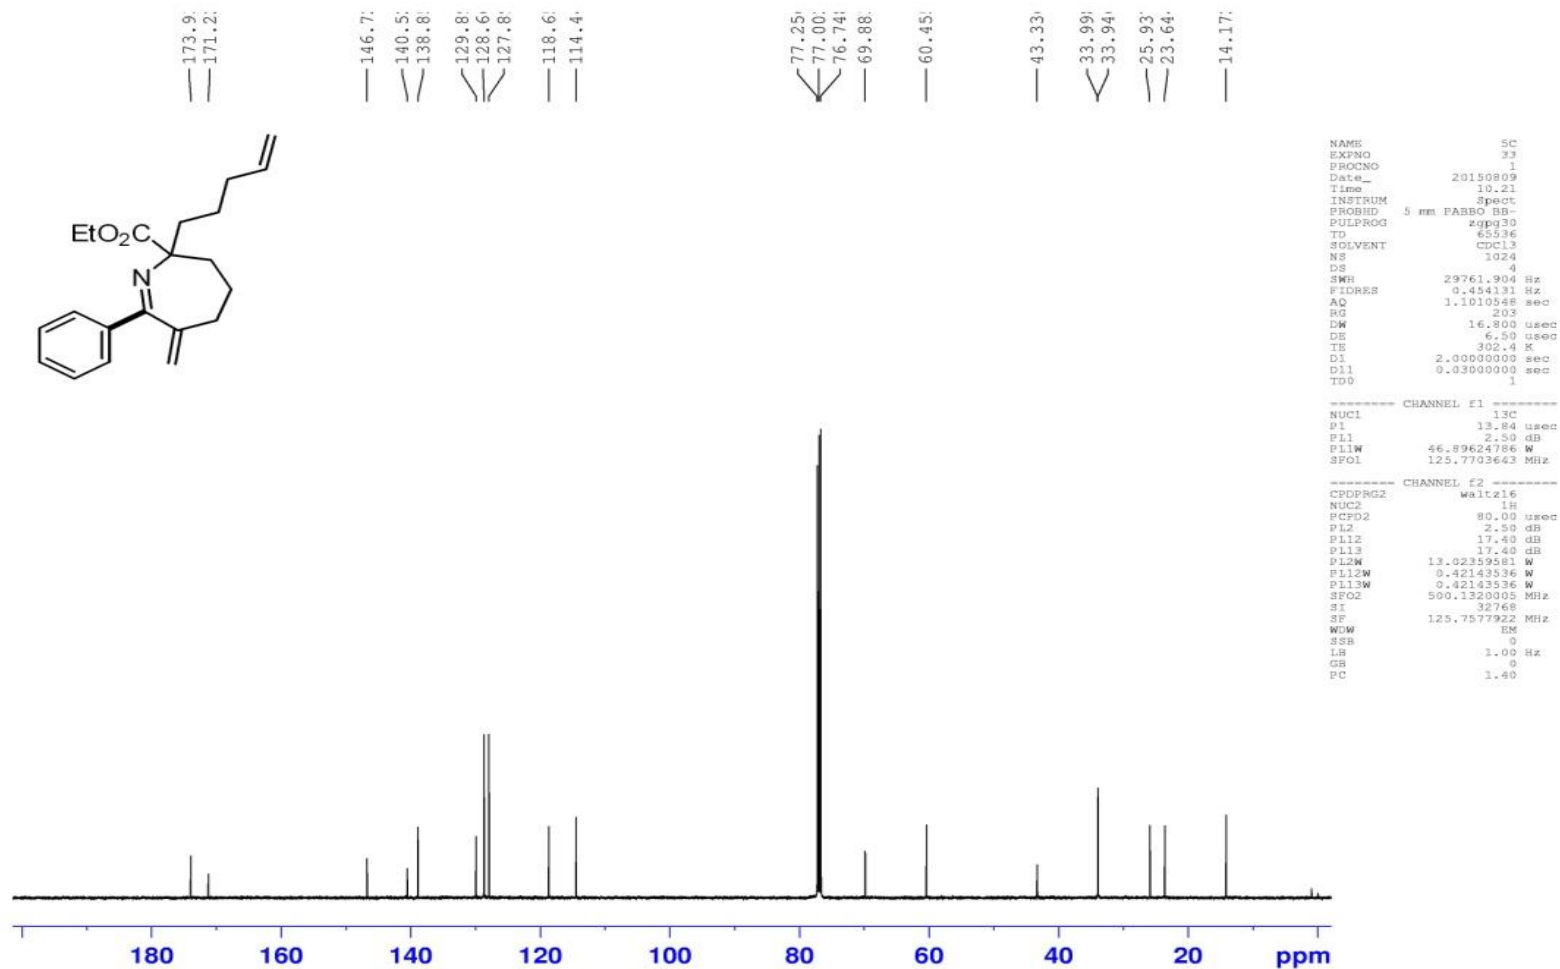

4e

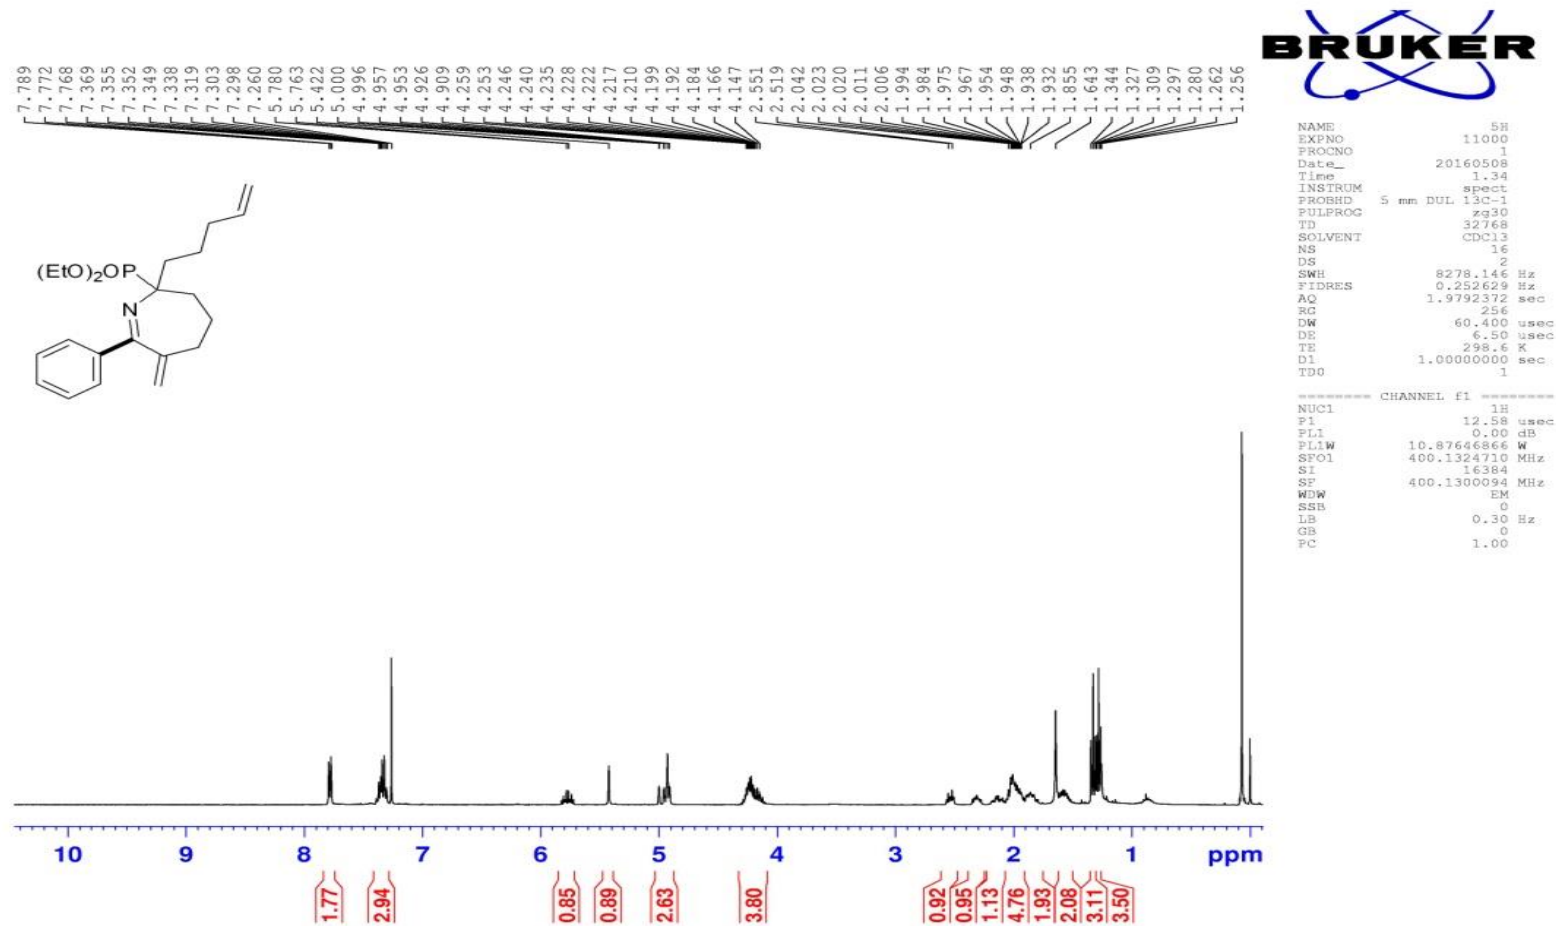

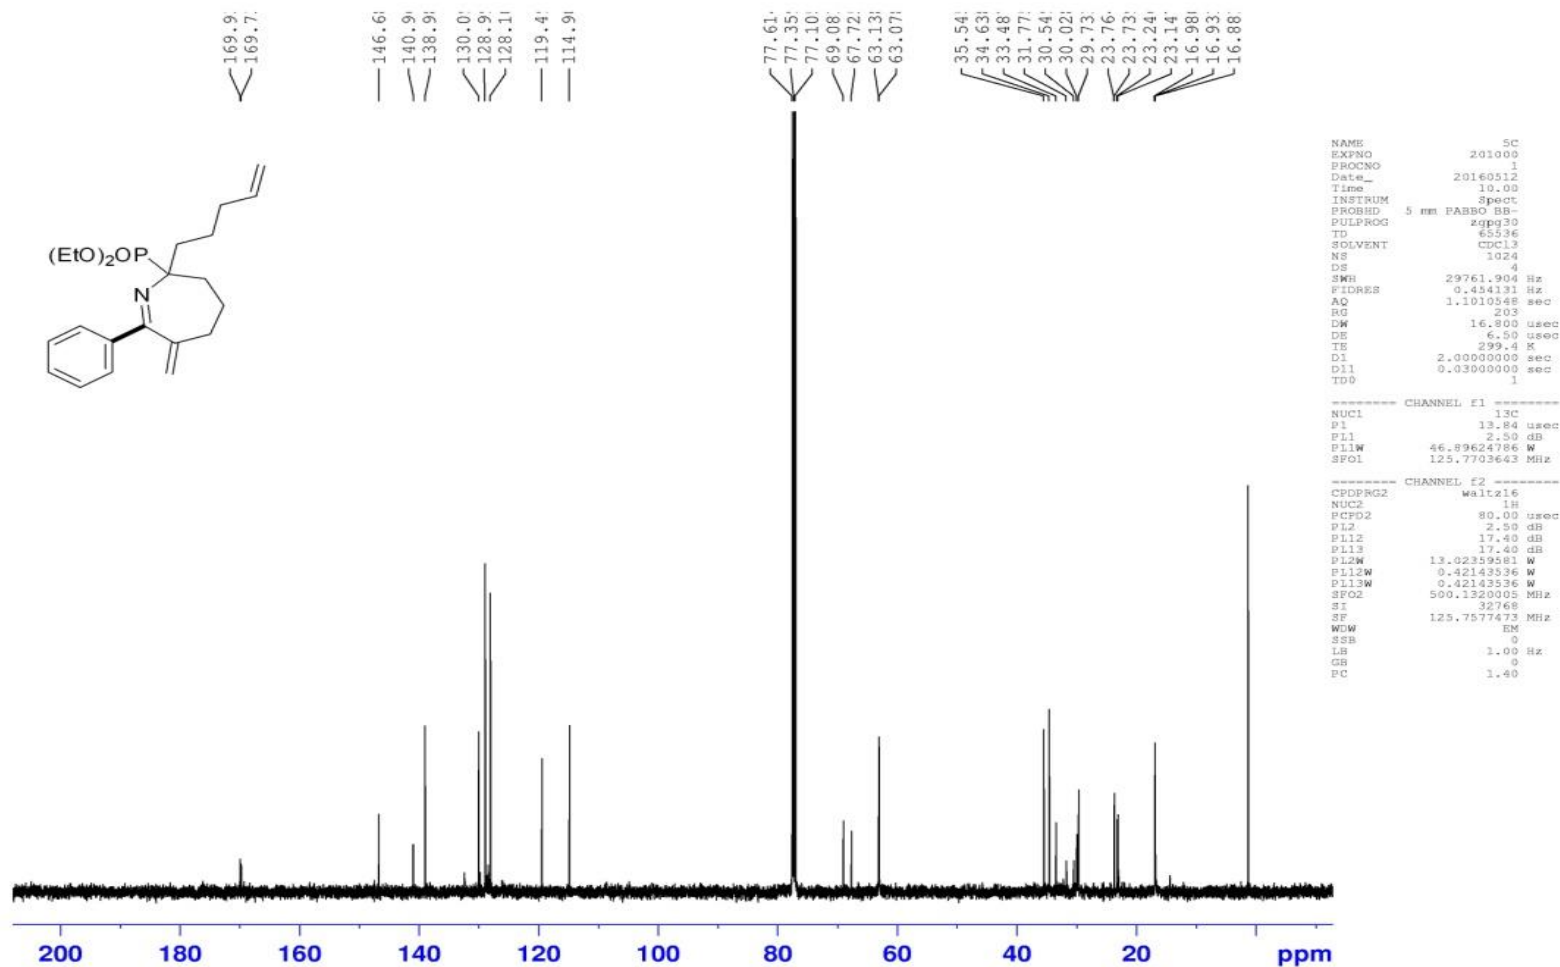

4f

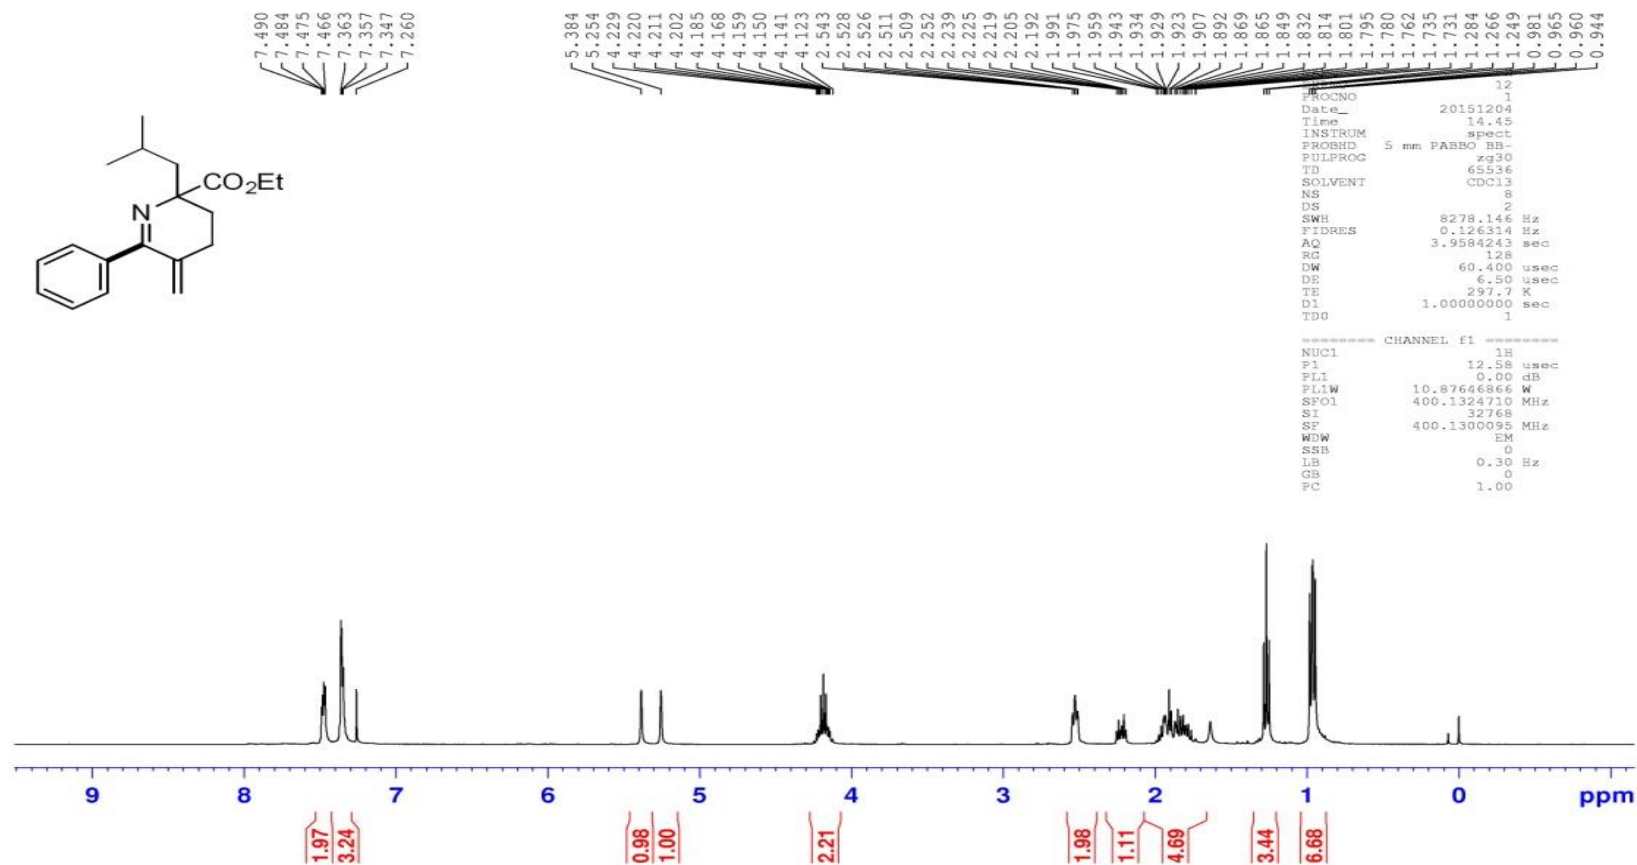

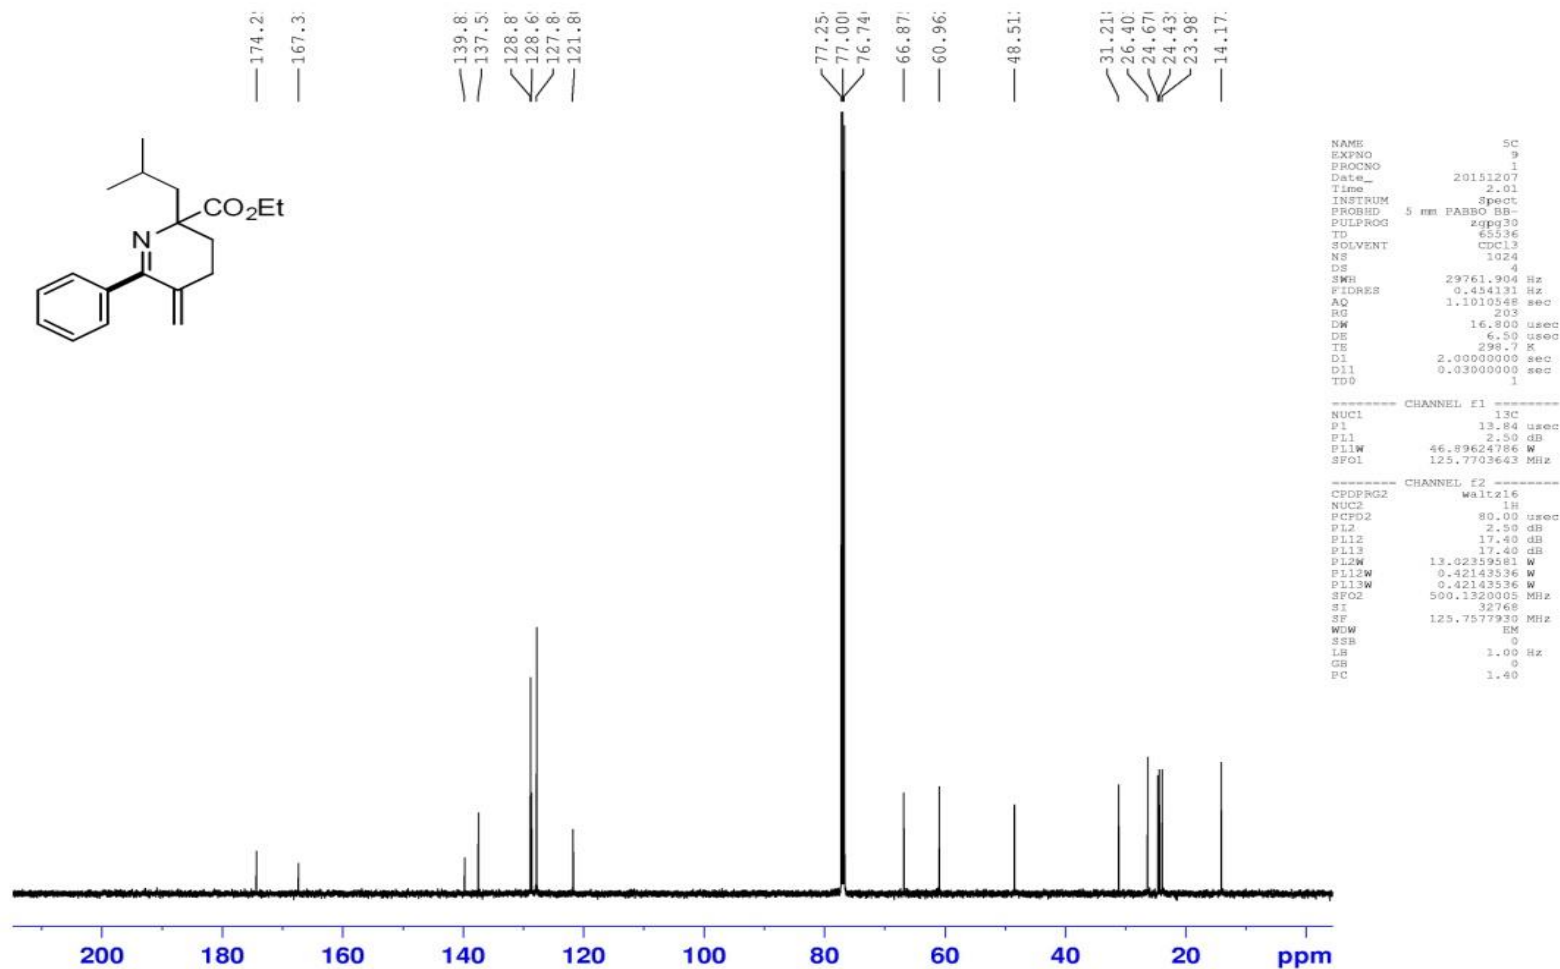

4g

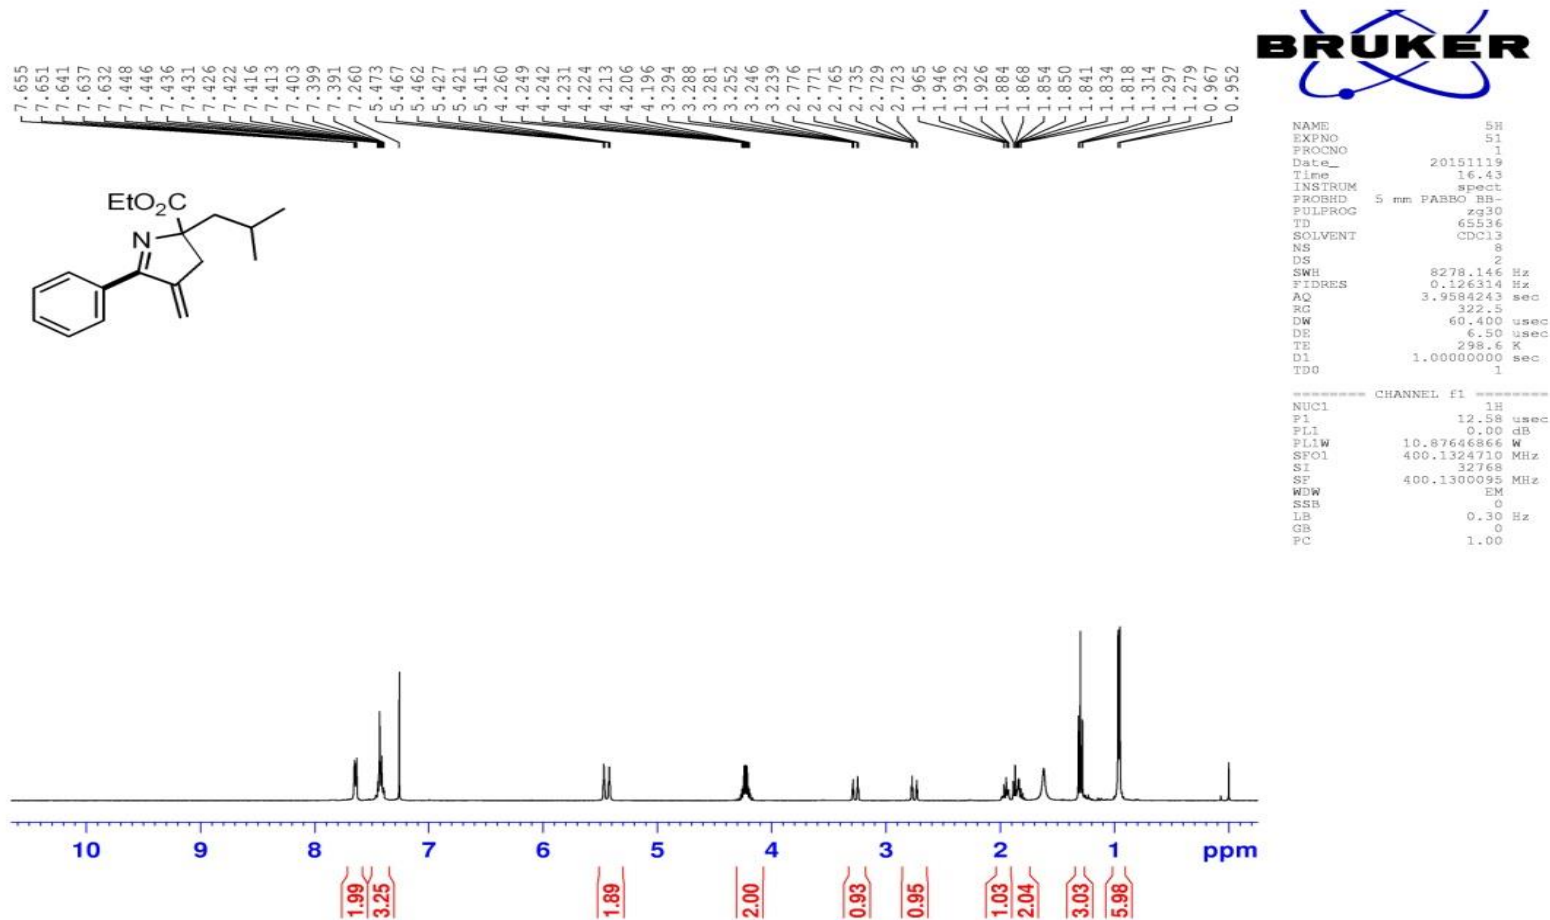

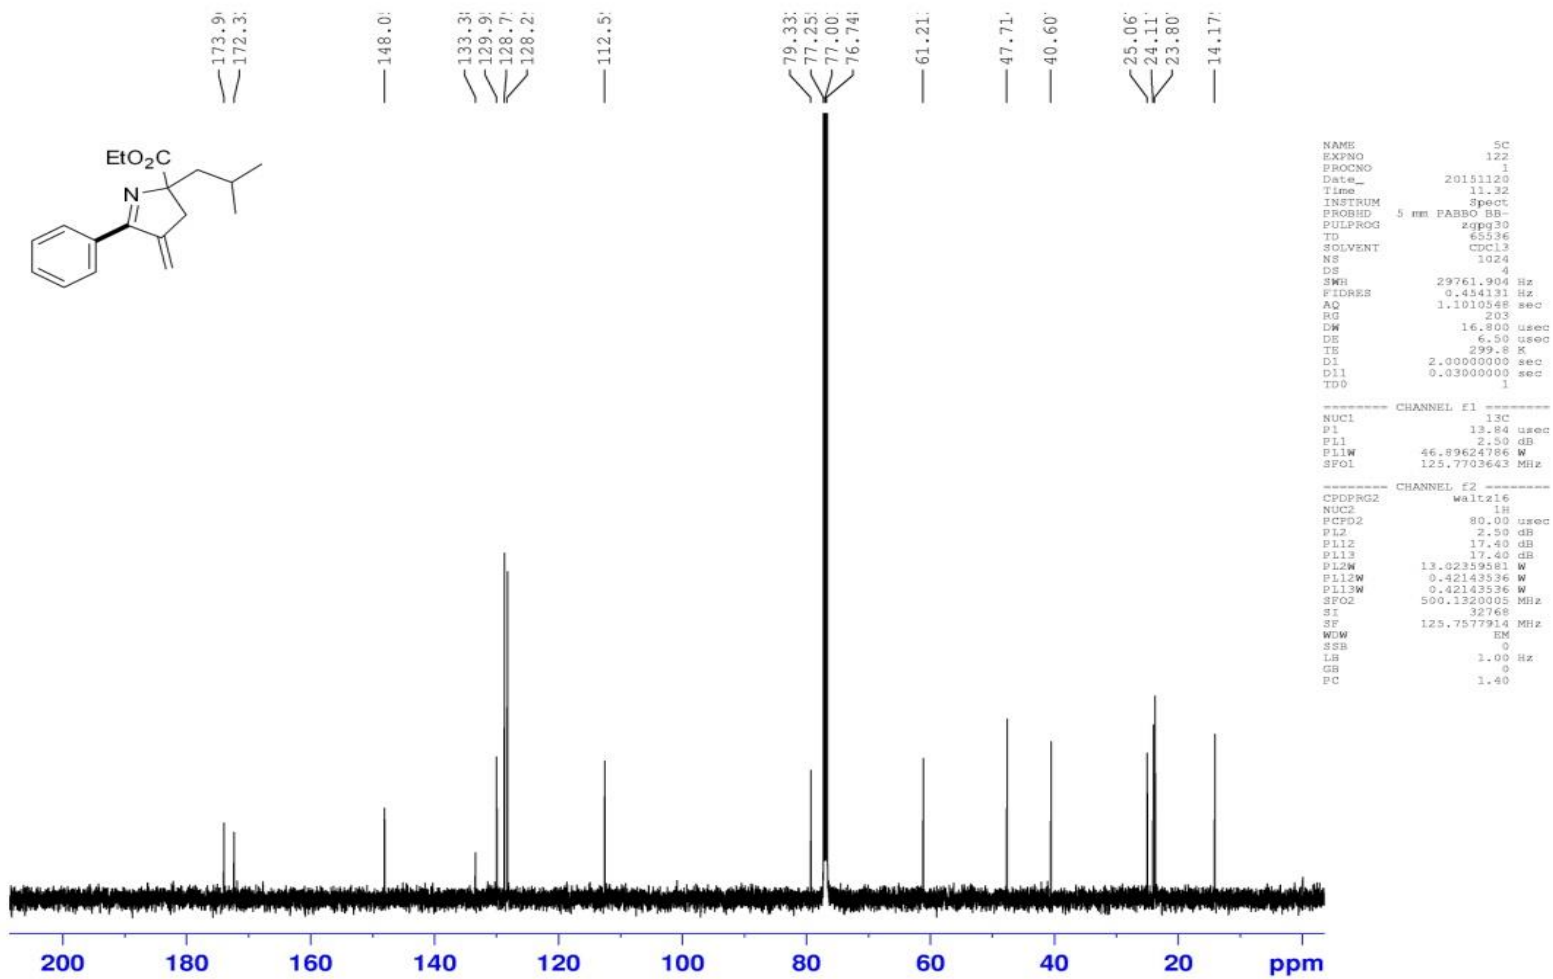



4h

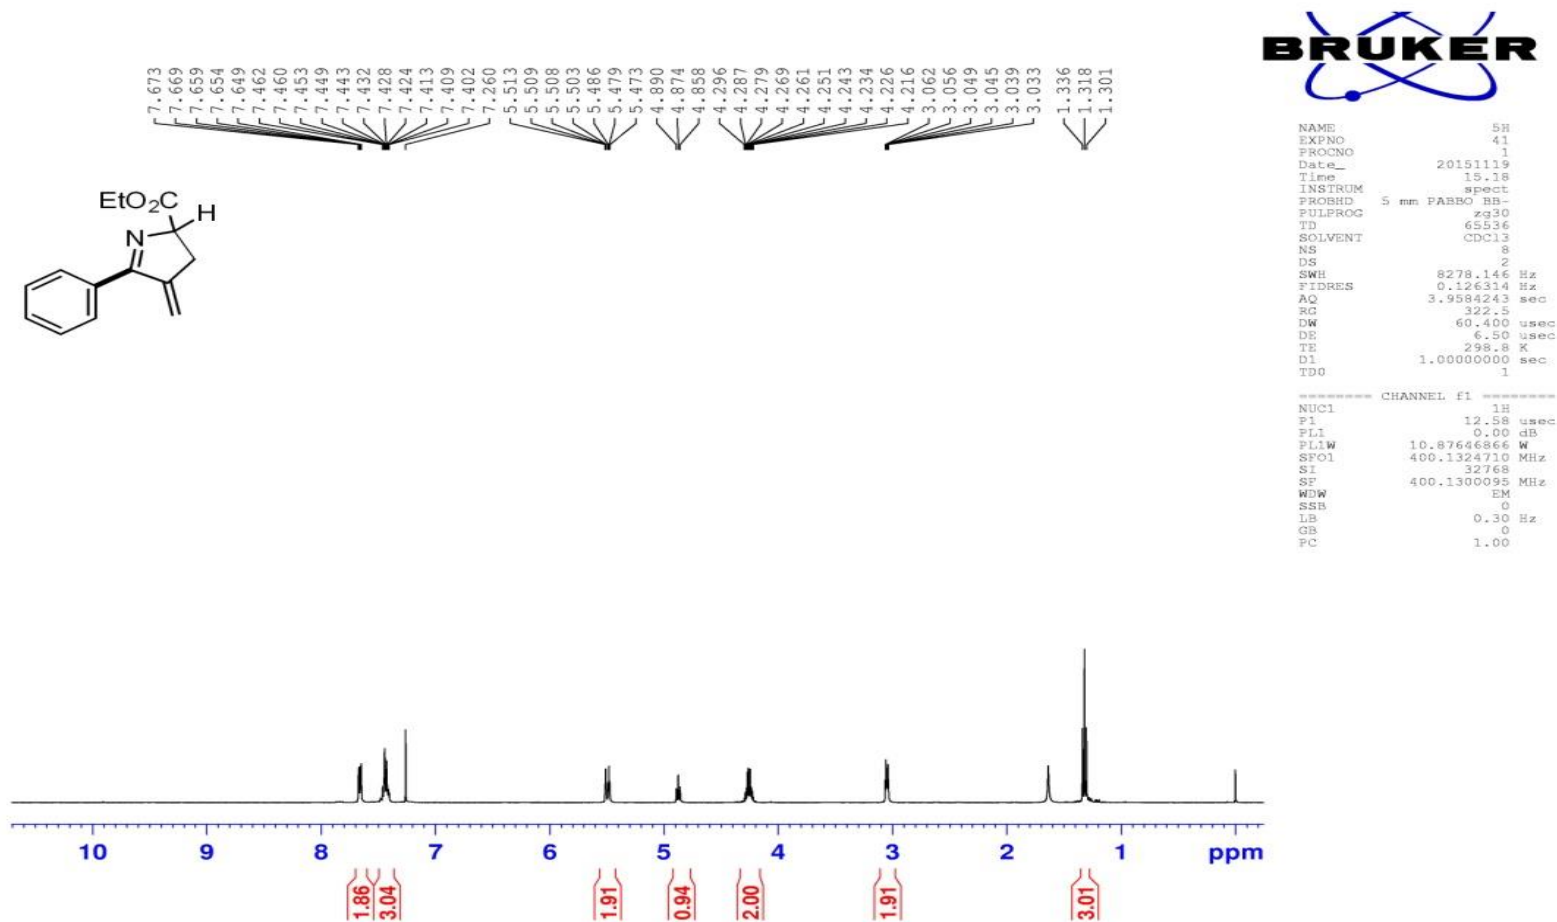

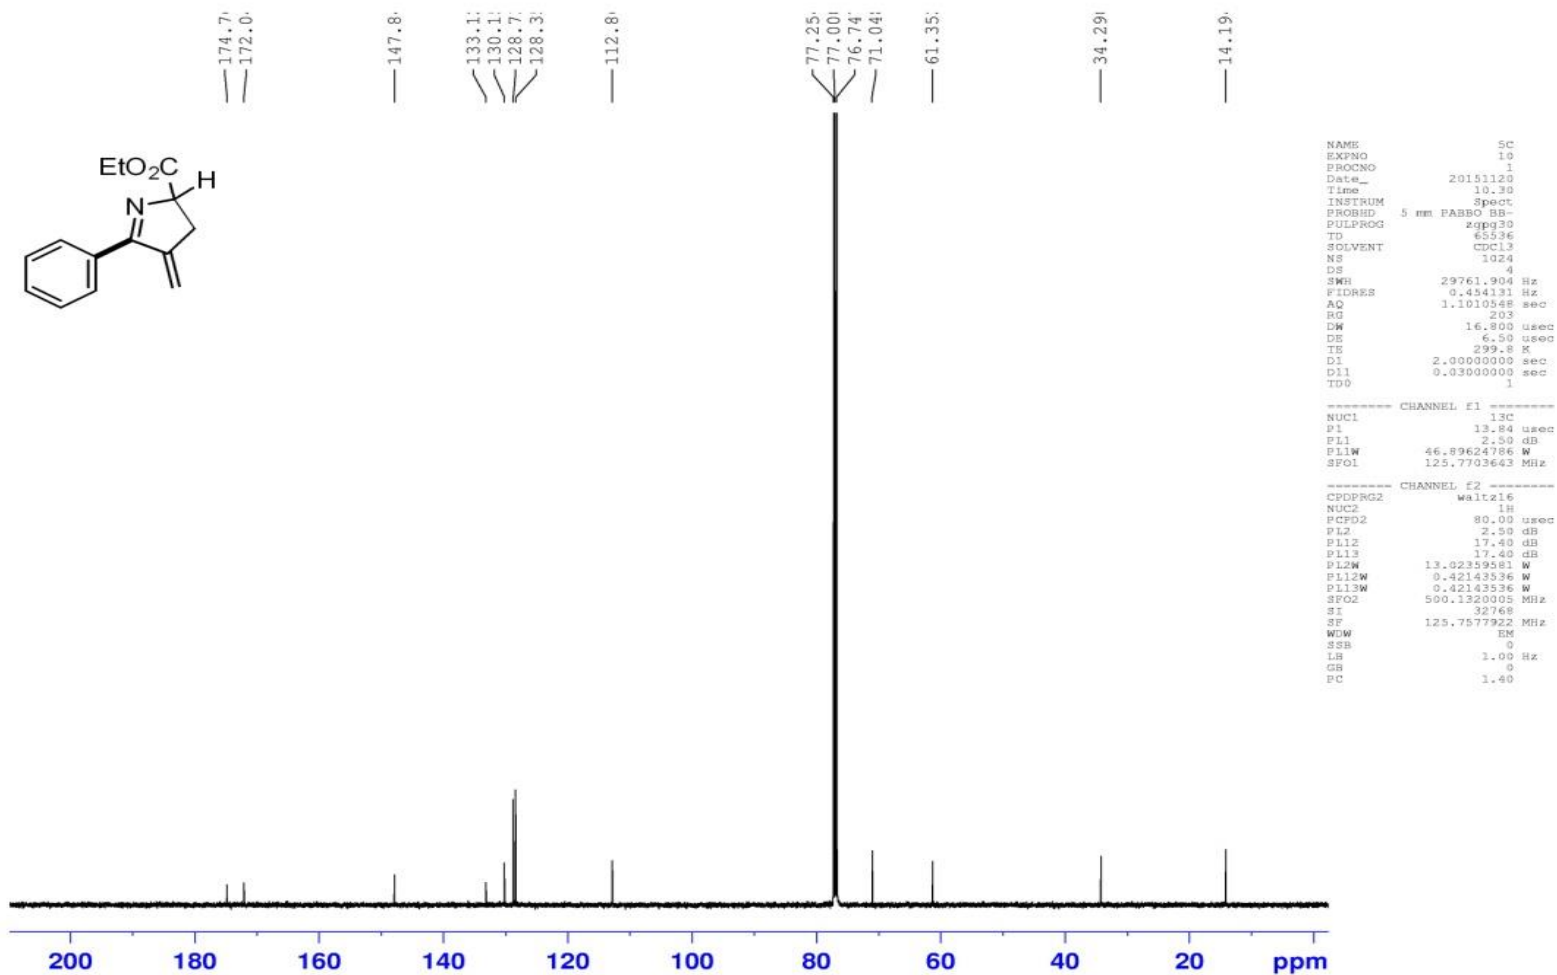

4i

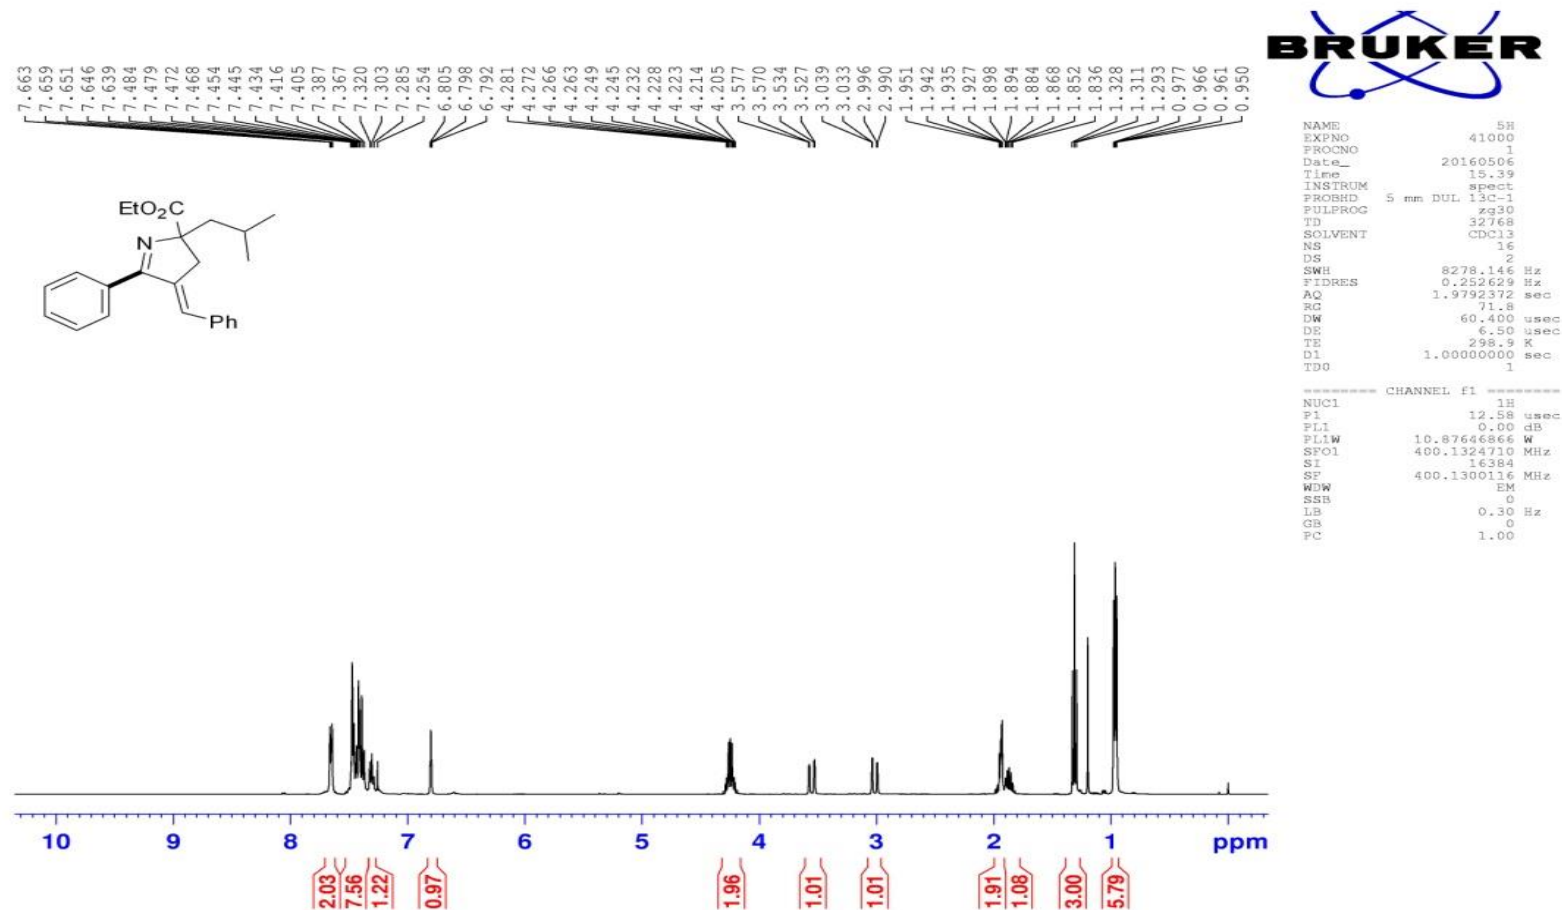

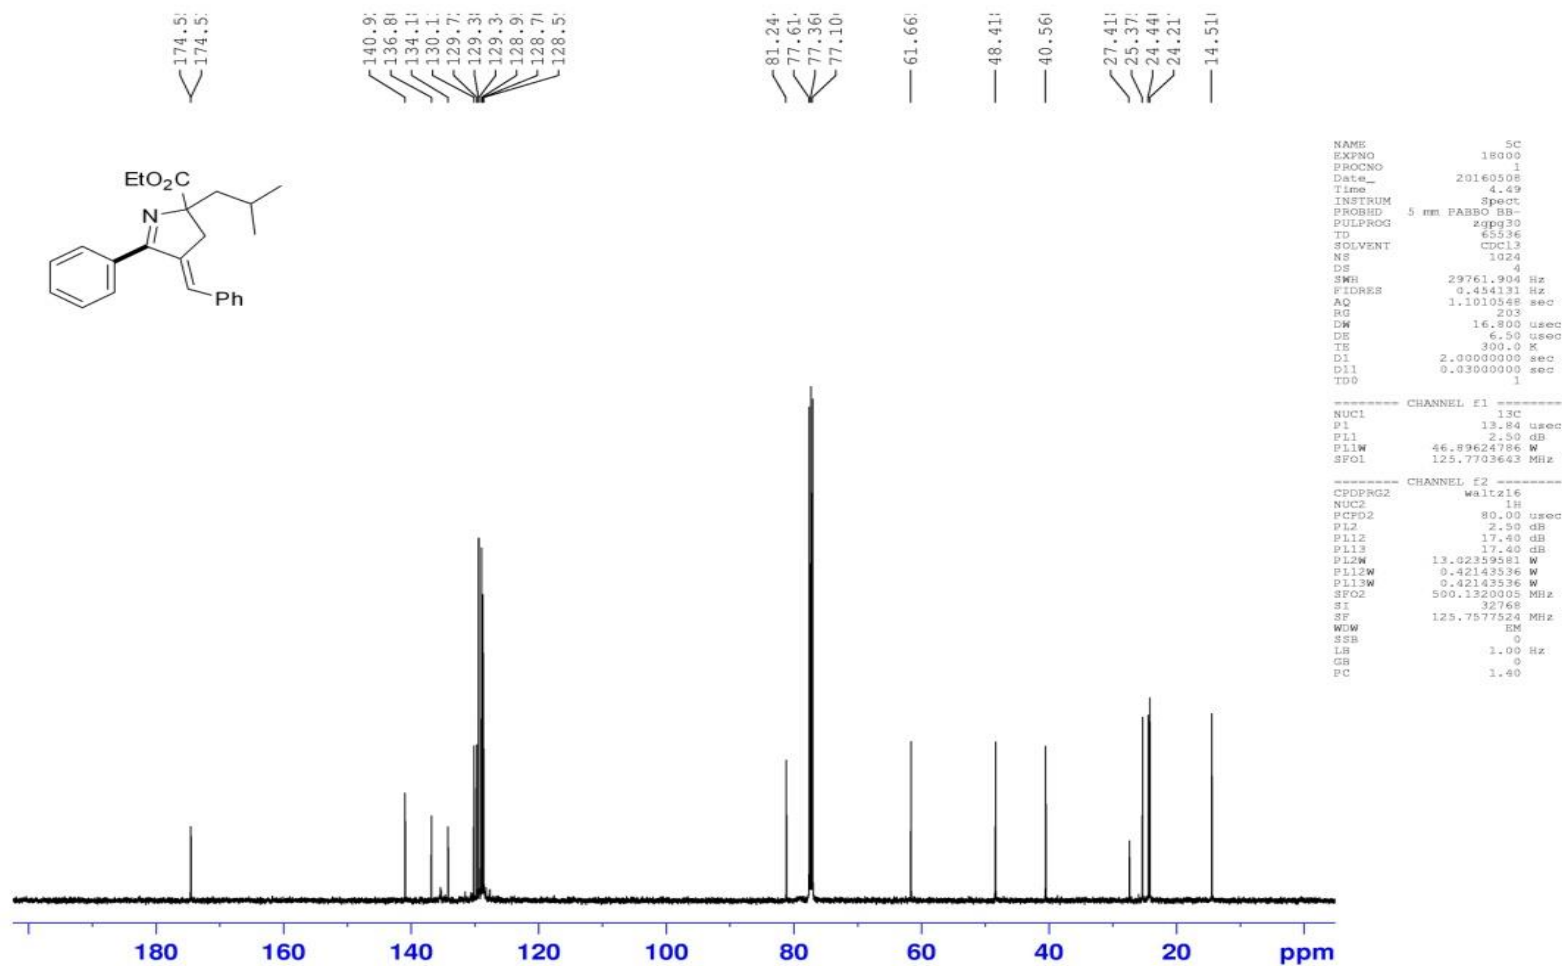

# 4i-HMBC

70060

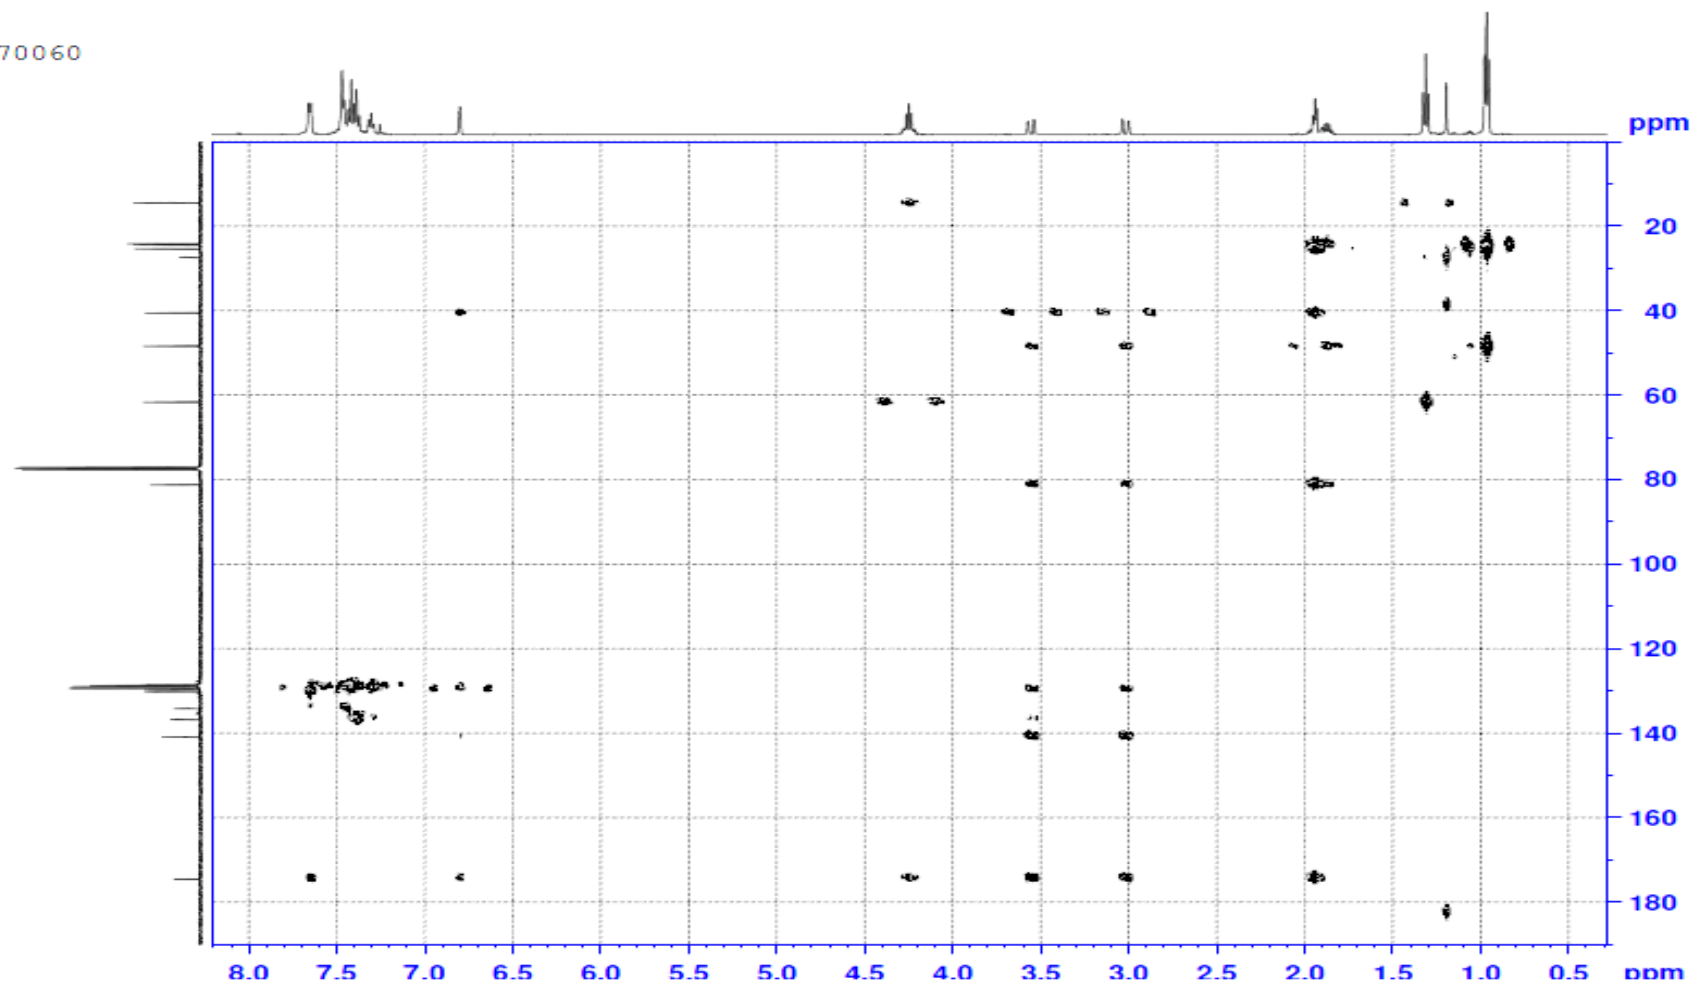

# 4i-NOE

70060

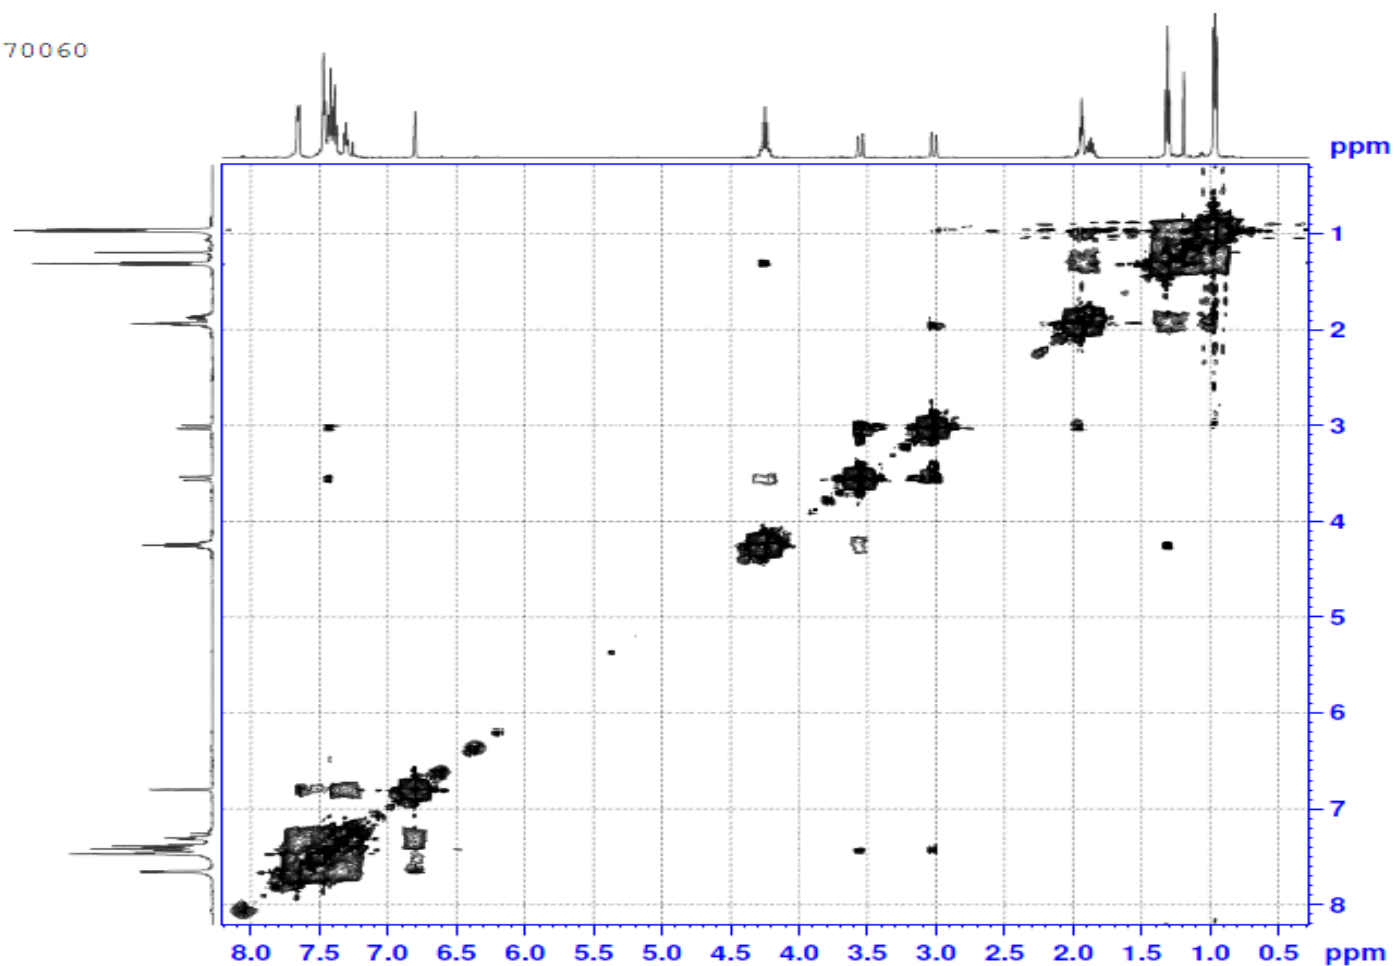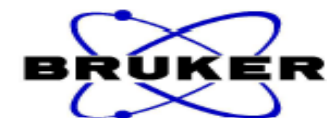

```

NAME          May10-2016
EXPNO         9
PROCNO        1
DATE_         20160510
TIME          22.24
INSTRUM       Spect
PROBHD        5 mm PABBO BB-
PULPROG       noesyph
TD            2648
SOLVENT       CDCl3
NS            32
DS            16
SWH           3968.254 Hz
FIDRES        1.937624 Hz
AQ            0.2580960 sec
RG            40.3
DW            126.000 usec
DE            6.50 usec
TE            298.1 K
D0            0.00010817 sec
D1            1.98566401 sec
DS            0.30000001 sec
IN0           0.00025200 sec

===== CHANNEL f1 =====
NUC1          1H
P1            14.00 usec
PL1           2.50 dB
PL1W          13.02359581 W
SFO1          500.1321480 MHz
WDW           1
GB            0
PC            1.00
MC2           State-TPP1
SF            500.1300258 MHz
WDW           QSIMM
SSB           2
LB            0.00 Hz
GB            0
PC            1.00
MC2           State-TPP1
SF            500.1300258 MHz
WDW           QSIMM
SSB           2
LB            0.00 Hz
GB            0
    
```
